# Supplementary material
Source: PubMed Central journal article supplement (PMC10956421)

## Supporting Information

### A Lewis Acid-Controlled Enantiodivergent Epoxidation of Aldehydes

Aliakbar Mohammadlou,<sup>§</sup> Chetan Joshi,<sup>‡</sup> Brendyn P. Smith,<sup>§</sup> Li Zheng,<sup>§</sup> Stephanie A. Corio,<sup>‡</sup> Virginia M. Canestraight,<sup>§</sup> Saeedeh Torabikohlbouni,<sup>§</sup> S. Maryamdokht Taimoory,<sup>†</sup> Babak Borhan,<sup>§</sup> Richard Staples,<sup>§</sup> Mathew J. Vetticatt,<sup>‡\*</sup> and William D. Wulff<sup>§\*</sup>.

<sup>§</sup>Department of Chemistry, Michigan State University, East Lansing, MI 48824.

<sup>†</sup>Department of Chemistry, University of Michigan, Ann Arbor, MI 48109

<sup>‡</sup>Department of Chemistry, Binghamton University, Binghamton, NY 13902

[vetticatt@binghamton.edu](mailto:vetticatt@binghamton.edu)

[wulff@chemistry.msu.edu](mailto:wulff@chemistry.msu.edu)

#### Table of Content

|                                                                                               |    |
|-----------------------------------------------------------------------------------------------|----|
| Supporting Information .....                                                                  | 1  |
| A Lewis Acid-Controlled Enantiodivergent Epoxidation of Aldehydes .....                       | 1  |
| 1. General Experimental.....                                                                  | 3  |
| 2. Optimization of the epoxidation of 3-silyloxypropanal 2 with the VANOL-Boron catalyst..... | 4  |
| 3. Epoxidation reaction catalyzed by aluminum-lithium-VANOL catalyst S-1 .....                | 5  |
| 4. Temperature optimization in the epoxidation of benzaldehyde 18.....                        | 6  |
| 5. Solvent and ligand optimization.....                                                       | 7  |
| 6. Optimization of catalyst loading and diazo compound.....                                   | 9  |
| 7. The effect of DMSO in aluminum catalyzed epoxidation of aldehyde 18.....                   | 10 |
| 8. General procedure 1: Asymmetric catalytic epoxidation reaction.....                        | 11 |

|                                                                                                  |    |
|--------------------------------------------------------------------------------------------------|----|
| 9. Deprotection of TBS-alcohol .....                                                             | 40 |
| 10. One pot alcohol tosylation and amide cyclization .....                                       | 41 |
| 11. General method for the crystal growth of compound (2 <i>S</i> , 3 <i>S</i> )-45 .....        | 42 |
| 12. PMB deprotection .....                                                                       | 43 |
| 13. General procedure 2: mono-protection of diol: <sup>10</sup> .....                            | 43 |
| 14. General procedure 3: Swern oxidation: .....                                                  | 45 |
| 15. Preparation of diazo compound .....                                                          | 48 |
| 16. Determining the absolute stereochemistry of epoxide 11 with host-guest system .....          | 48 |
| 17. Computational Methods .....                                                                  | 50 |
| 18. Brønsted Acid Assisted Lewis Acid Pathway for Boron .....                                    | 53 |
| 19. Brønsted Acid Pathway for Boron .....                                                        | 55 |
| 20. Brønsted Acid Assisted Lewis Acid Pathway for Aluminum .....                                 | 58 |
| 21. Brønsted Acid Pathway for Aluminum .....                                                     | 59 |
| 22. Alternate Structure of VANOL-derived Boron Catalyst .....                                    | 62 |
| 23. Pentacoordinated Aluminum .....                                                              | 66 |
| 24. Comparison of various computational methods .....                                            | 68 |
| 25. Analysis of key transition structures for selectivity-determining step for BLA pathway ..... | 73 |
| 26. Energetics for different possible conformations .....                                        | 78 |
| 27. References .....                                                                             | 84 |

## 1. General Experimental

All reactions were performed in flame-dried glassware under an atmosphere of nitrogen unless otherwise indicated. Unless otherwise specified, all solvents were strictly dried before use: dichloromethane were distilled over calcium hydride under nitrogen; tetrahydrofuran, and toluene were distilled from sodium and benzophenone. Hexanes and ethyl acetate were ACS grade and used as purchased.

Melting points were recorded on a Thomas Hoover capillary melting point apparatus and are uncorrected. Varian Unity Plus 500 MHz spectrometer was used to record the  $^1\text{H}$  NMR and  $^{13}\text{C}$  NMR spectra using  $\text{CDCl}_3$  as solvent. The residual peak of  $\text{CDCl}_3$  or TMS was used as the internal standard for both  $^1\text{H}$  NMR ( $\delta = 7.26$  ppm for  $\text{CDCl}_3$  or  $\delta = 0$  ppm for TMS) and  $^{13}\text{C}$  NMR ( $\delta = 77.0$  ppm). Chemical shifts were reported in parts per million (ppm). Analytical thin-layer chromatography (TLC) was performed on Silicycle silica gel plates with F-254 indicator. Visualization was by short wave (254 nm) and long wave (365 nm) ultraviolet light, or by staining with phosphomolybdic acid in ethanol. Column chromatography was performed with silica gel 60 (230 – 450 mesh). HPLC analyses were performed using Agilent 1100 or 1260 HPLC System with CHIRALCEL® OD-H and PIRKLE COVALENT (*R,R*) WHELK-O 1 columns. HPLC grade hexanes (mixture of isomers) and 2-propanol were used for HPLC analyses. Optical rotations were obtained at a wavelength of 589 nm (sodium D line) using a 1.0 decimeter cell with a total volume of 1.0 ml. Specific rotations are reported in degrees per decimeter at 20 °C and the concentrations are given in gram per 100 mL in spectral grad  $\text{CHCl}_3$  unless otherwise noted. IR spectra were

recorded on NaCl disc (for liquids) on a Nicolet IR/42 spectrometer. High Resolution Mass Spectrometry was performed in the Department of Chemistry at Michigan State University Mass Facility. Aldehydes were purchased from Sigma-Aldrich, Alfa-Aesar, Combi-Blocks or Oakwood and were purified by distillation or sublimation unless otherwise indicated. AlMe<sub>3</sub> was purchased from Sigma-Aldrich as a 2 M solution in toluene and was used as received. VANOL, VAPOL and their derivatives were made according to published procedures.<sup>1-4</sup>

## **2. Optimization of the epoxidation of 3-silyloxypropanal 2 with the VANOL-Boron catalyst**

Epoxidation with VANOL-boron catalyst was subjected to re-optimization involving changes in the catalyst loading, temperature and the amount of DMSO used in catalyst generation (Table S1). The results reveal that the yield could not be enhanced to any satisfactory level unless the catalyst loading was increased to 20 mol% (entries 6-8). Interestingly, increasing the temperature from –40 to 0 °C did not result in any significant change in the yield although the amount of the β-ketoamide side-product 15 doubled (entries 4 vs 5 and 6 vs 7). Removing the DMSO from the catalyst preparation did enhance the yield but the asymmetric induction dropped from 66% to 56% ee (entries 6 vs 8). The use of the VAPOL ligand 17 did not give a useful reaction (entry 11). The *t*-butyldiphenylsilyl substituted aldehyde 2b did give a reasonable yield at 10 mol% catalyst (entries 4 vs 12) but the yield and induction were not improved at 20 mol% catalyst (entries 8 vs 13).

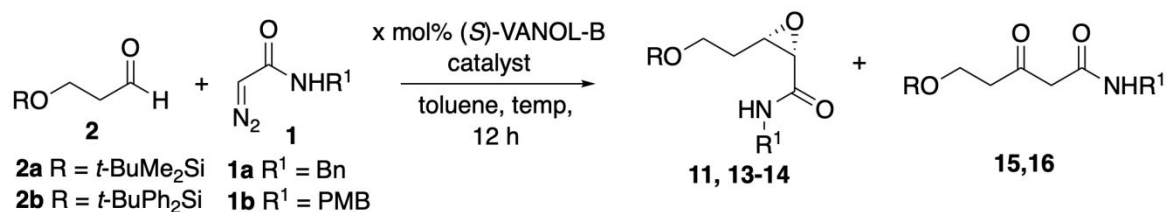

Optimization of the epoxidation of 3-silyloxypropanal **2** with the VANOL-Boron catalyst. <sup>a</sup>

| entry           | R     | R <sup>1</sup> | catalyst<br>(x mol%) | Me <sub>2</sub> SO<br>(2x mol%) | temp<br>(°C) | % conv <sup>b</sup> | epoxide   | % yield<br>epoxide <sup>c</sup> | %ee<br>epoxide | % yield<br><b>15,16</b> <sup>d</sup> |
|-----------------|-------|----------------|----------------------|---------------------------------|--------------|---------------------|-----------|---------------------------------|----------------|--------------------------------------|
| 1               | TBS   | Bn             | 5                    | 0                               | -40          | 15                  | <b>11</b> | (12)                            | nd             | nd                                   |
| 2               | TBS   | Bn             | 5                    | 10                              | -40          | 10                  | <b>11</b> | (<5)                            | nd             | nd                                   |
| 3               | TBS   | PMB            | 5                    | 0                               | -40          | 9                   | <b>13</b> | (<5)                            | nd             | nd                                   |
| 4               | TBS   | PMB            | 10                   | 20                              | 0            | 16                  | <b>13</b> | (11)                            | nd             | nd                                   |
| 5               | TBS   | PMB            | 10                   | 20                              | -40          | 9                   | <b>13</b> | (<5)                            | nd             | nd                                   |
| 6               | TBS   | PMB            | 20                   | 40                              | 0            | 99                  | <b>13</b> | 47                              | 66             | 34 <sup>e</sup>                      |
| 7               | TBS   | PMB            | 20                   | 40                              | -40          | 72                  | <b>13</b> | 51                              | 65             | 17 <sup>e</sup>                      |
| 8               | TBS   | PMB            | 20                   | 0                               | 0            | 90                  | <b>13</b> | 63                              | 78             | 4 <sup>e</sup>                       |
| 9 <sup>f</sup>  | TBS   | PMB            | 20                   | 0                               | 0            | 80                  | <b>13</b> | 47                              | 78             | 32 <sup>e</sup>                      |
| 10 <sup>g</sup> | TBS   | PMB            | 20                   | 0                               | 0            | 95                  | <b>13</b> | 46                              | 30             | 10 <sup>e</sup>                      |
| 11 <sup>h</sup> | TBS   | PMB            | 10                   | 0                               | 0            | 21                  | <b>13</b> | (19)                            | nd             | nd                                   |
| 12              | TBDPS | PMB            | 10                   | 20                              | 0            | 87                  | <b>14</b> | 44                              | 50             | 24 <sup>i</sup>                      |
| 13              | TBDPS | PMB            | 20                   | 0                               | 0            | 99                  | <b>14</b> | 65                              | 52             | 34 <sup>i</sup>                      |

<sup>a</sup> Unless otherwise specified, all reactions were carried out in toluene at 0.1 M in diazo compound **1** (0.5 mmol) with 1.2 equiv of **2**. The catalyst was prepared as indicated in Scheme 2. <sup>b</sup> Determined by <sup>1</sup>H NMR with Ph<sub>3</sub>CH as internal standard. <sup>c</sup> Isolated yield. <sup>d</sup> <sup>1</sup>H NMR yields are given in parenthesis with Ph<sub>3</sub>CH as internal standard. <sup>e</sup> Isolated yields. <sup>f</sup> Reaction with 4 equiv of **2a**. <sup>g</sup> Catalyst prepared from (*R*)-VAPOL **17** and *ent*-**13** was formed. <sup>h</sup> Catalyst prepared from (*S*)-VAPOL **17**. <sup>i</sup> Ketoamide **16**.

Table S1: Optimization of the epoxidation of 3-silyloxypropanal **2** with the VANOL-Boron catalyst.

### 3. Epoxidation reaction catalyzed by aluminum-lithium-VANOL catalyst S-1

Reacting 1.0 equiv of LiAlH<sub>4</sub> with 2.0 equiv of (*R*)-VANOL **10** produced heterobimetallic aluminum-lithium-VANOL complex (ALV) **S-1**. The BINOL version of this catalyst has been reported by Shibasaki to be effective in a number of asymmetric catalytic reactions.<sup>5,6</sup> Unfortunately, no product was observed after conducting the epoxidation of benzaldehyde with diazo acetamide **1c** the presence of 10 mol% ALV catalyst **S-1** (Scheme S1).

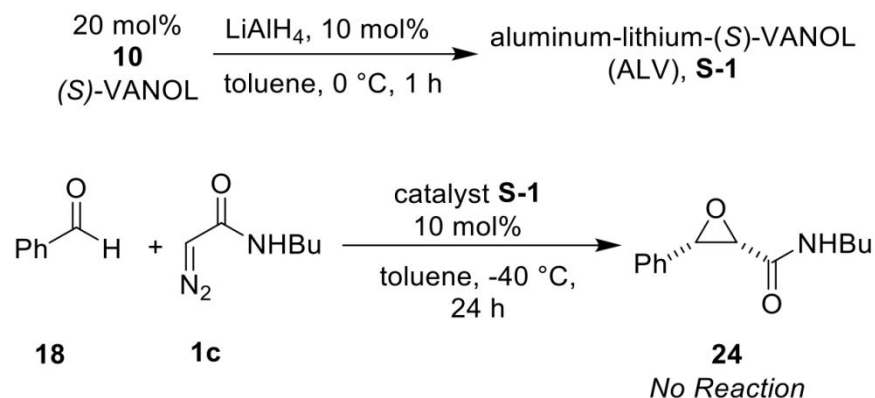

Scheme S1: Epoxidation reaction catalyzed by aluminum-lithium-(S)-VANOL

#### 4. Temperature optimization in the epoxidation of benzaldehyde **18**

Surprisingly, when the epoxidation reaction was performed with the aluminum catalyst **47** which was prepared from  $\text{AlMe}_3$  (1.0 equiv.) and VANOL **10** (2.0 equiv.), a 19% yield (NMR) was obtained of the desired epoxide **24** at  $-40 \text{ }^\circ\text{C}$  (Table S2, entry 1). Further optimization of the temperature revealed the optimum temperature for this reaction to be  $0 \text{ }^\circ\text{C}$  which gave the epoxide in 80% yield and 72% *ee* (Table S2, entry 3). Higher temperatures are detrimental to the yield of the reaction presumably due to a competing Roskamp reaction although a study of this was not pursued (entry 4). Interestingly, the enantiomeric excess of the epoxide was not affected by altering the temperature of the reaction.

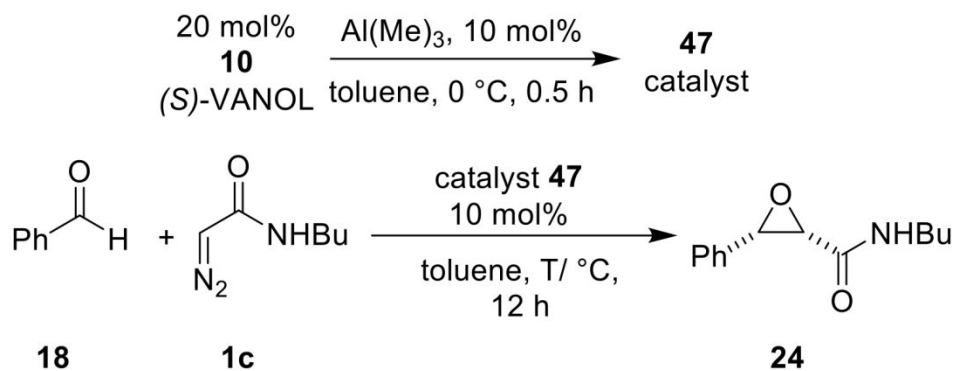

| entry | T/°C   | isolated yield% | ee%                   |
|-------|--------|-----------------|-----------------------|
| 1     | -40 °C | 19 <sup>1</sup> | <i>not determined</i> |
| 2     | -20 °C | 57              | 72                    |
| 3     | 0 °C   | 80              | 72                    |
| 4     | 25 °C  | 62              | 72                    |

Unless otherwise specified, all of the reactions were done in toluene at 0 °C for 12 h with 0.5 mmol of diazo compound **1c** and 0.6 mmol of aldehyde. 1. NMR yield

Table S2: Temperature optimization in aluminum catalyzed epoxidation reaction.

## 5. Solvent and ligand optimization

Next, we turned our attention to the optimization of the solvent system. CH<sub>2</sub>Cl<sub>2</sub> was as effective as toluene and produced epoxide **24** with comparable results (Table S3, entry 2). However, solvents containing heteroatoms such as THF and acetonitrile delivered the epoxide in poor yields (entry 3 and 4). These solvents are presumably coordinating to the catalyst and preventing the coordination of aldehyde, and thus stopping the reaction. BINOL did not perform well in this reaction and gave the epoxide in 60% yield and only 4% *ee* (entry 5). The catalyst generated from 7,7'-*t*Bu<sub>2</sub>VANOL **S-2** produced epoxide **24** in higher *ee* compared with VANOL but in moderate

yield (entry 1 vs 6). We were delighted to observe excellent yield and excellent *ee* while conducting the reaction with the catalyst derived from the VAPOL ligand **17** (entry 7). Ligand **S-3** also performed excellently and afforded the epoxide in 88% yield and 99% *ee* (entry 8).

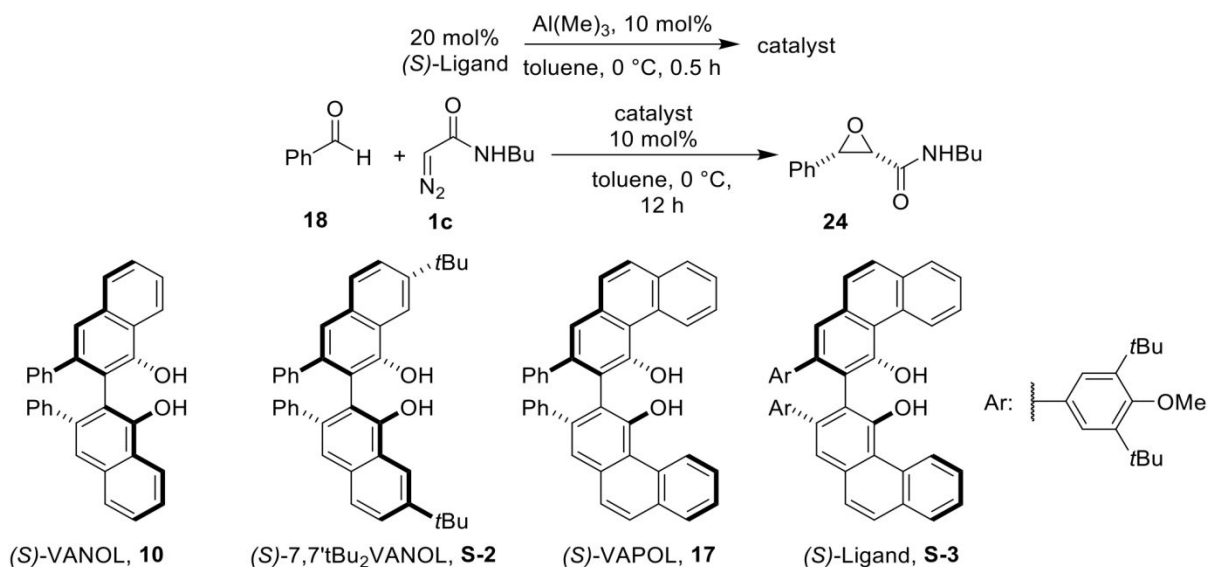

| entry | Ligand                                     | Solvent | isolated yield% | ee%         |
|-------|--------------------------------------------|---------|-----------------|-------------|
| 1     | (S)-VANOL, <b>10</b>                       | toluene | 80              | 72          |
| 2     | (S)-VANOL, <b>10</b>                       | DCM     | 80              | 72          |
| 3     | (S)-VANOL, <b>10</b>                       | THF     | 46              | 84          |
| 4     | (S)-VANOL, <b>10</b>                       | MeCN    | 6 <sup>1</sup>  | <i>N.D.</i> |
| 5     | (S)-BINOL                                  | toluene | 60              | 4           |
| 6     | (S)-7,7'tBu <sub>2</sub> VANOL, <b>S-2</b> | toluene | 46              | 84          |
| 7     | (S)-VAPOL, <b>17</b>                       | toluene | 81              | 98          |
| 8     | (S)-Ligand, <b>S-3</b>                     | toluene | 88              | 99          |

Unless otherwise specified, all of the reactions were done in toluene at 0 °C for 12 h with 0.5 mmol of diazo compound **1c** and 0.6 mmol of aldehyde. 1. NMR yield

Table S3: Optimization of the epoxidation of 3-silyloxypropanal **2** with the VANOL-Boron catalyst.



## 6. Optimization of catalyst loading and diazo compound

Decreasing the catalyst loading to 5 mol% produced similar results (Table S4, entry 1 vs 2). With 2.5 mol% catalyst loading, the reaction worked fine albeit with a slight deterioration in *ee* and yield (entry 3). However, conducting the reaction with 1 mol% catalyst loading resulted in only 30% NMR yield (entry 4).

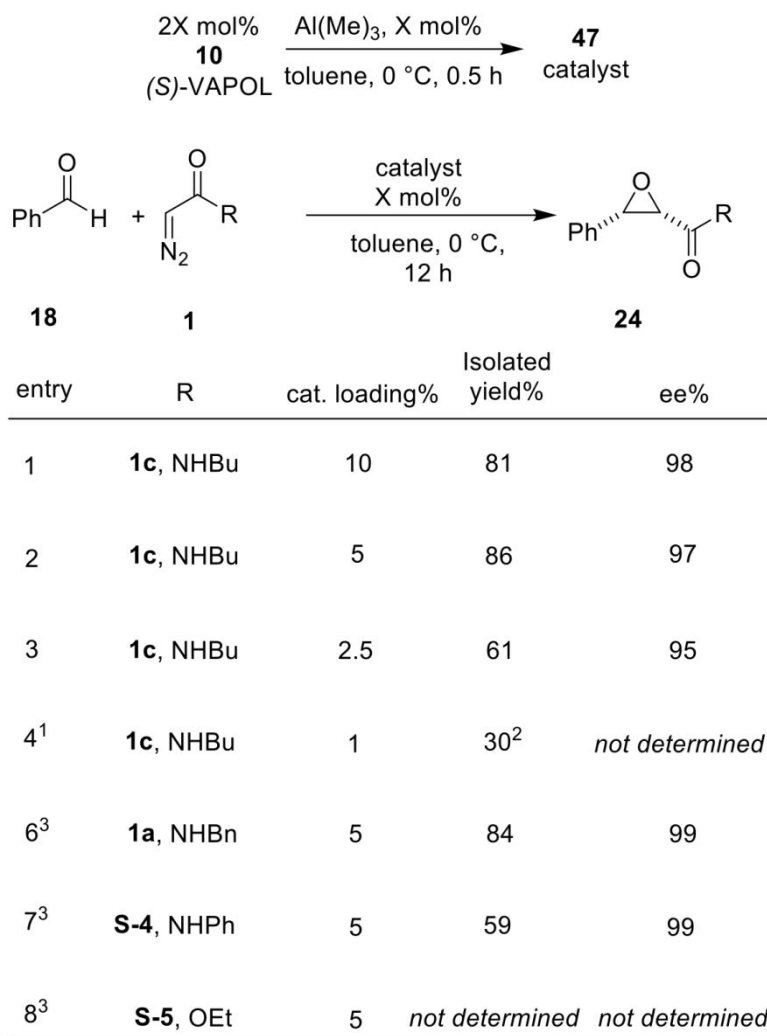

Unless otherwise specified, all of the reactions were done in toluene at 0 °C for 12 h with 0.5 mmol of diazo compound **1** and 0.6 mmol of aldehyde. 1. The reaction was quenched after 21 h. 2. NMR yield. 3. The reaction was quenched after 3 h

Table S4: Study of catalyst loading and diazo compound.

Different diazo compounds were also evaluated during the course of epoxidation and it turned out that the N-benzyl diazo acetamide **1a** is the optimum reagent (entry 6). The reaction with N-phenyl diazo acetamide **S-4** produced epoxide with high enantioinduction but with lower yield presumably because of its poor solubility in toluene (Table S4, entry 7). In contrast, no product was detected when the reaction was carried out with ethyl diazo acetate **S-5** instead the alkylated VAPOL ligand was observed in the crude mixture of the reaction.

### 7. The effect of DMSO in aluminum catalyzed epoxidation of aldehyde **18**

Previously, we have demonstrated that DMSO had a profound effect on the epoxidation of aldehydes with diazo acetamides. The effect of DMSO was also examined in epoxidation reaction catalyzed by aluminum catalyst (Scheme S2). The reaction was conducted in the presence of 10 mol% DMSO, interestingly, no change in the *ee* of the epoxide was observed although a slight decrease in yield was observed (Scheme S2, vs Table S3 entry 1).

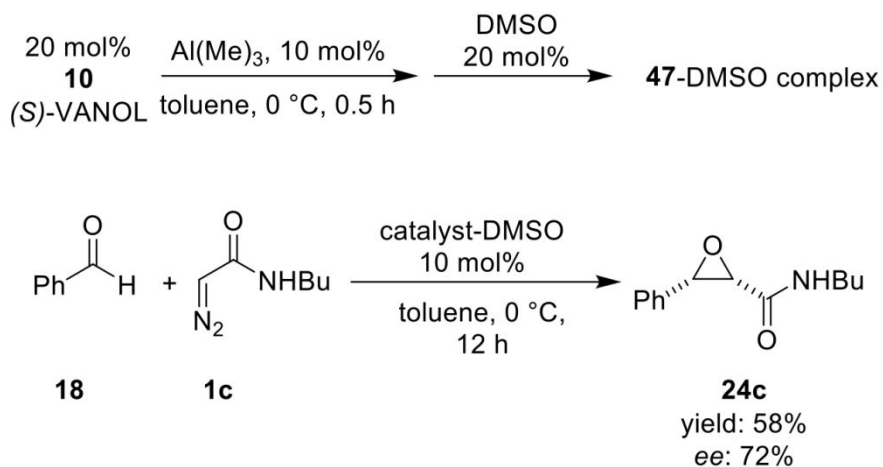

Scheme S2: Epoxidation reaction catalyzed by aluminum-VANOL-DMSO complex

## 8. General procedure 1: Asymmetric catalytic epoxidation reaction

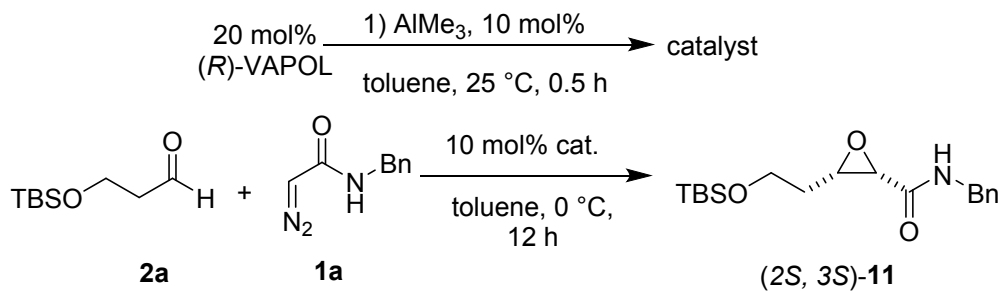

*General procedure for preparation of catalyst stock solution:* A flame dried 25 mL round bottom flask filled with nitrogen was charged with (*R*)-VAPOL (0.149 mmol, 82.0 mg) and toluene (3 mL). The resulting mixture was stirred at room temperature for 5 minutes until the ligand was fully dissolved then AlMe<sub>3</sub> (0.075 mmol, 38  $\mu$ L, 2M solution in toluene) was added and the reaction mixture was stirred at room temperature for 30 minutes.

*General procedure for the epoxidation reaction catalyzed with aluminum-VAPOL catalyst:*

*(2*S*, 3*S*)-3-(2-((*tert*-butyldimethylsilyl)oxy)ethyl)-*N*-benzyl-oxirane-2-carboxamide **11**:* Another flame dried round bottom flask filled with nitrogen was charged with *N*-benzyl diazo acetamide (0.49 mmol, 88 mg) **1a**, toluene (3 mL) and aldehyde 3-*t*-butyldimethylsilyloxypropanal (0.591 mmol, 127  $\mu$ L) **2a**. The obtained cloudy mixture and the catalyst stock solution prepared from (*S*)-VAPOL were cooled down to 0 °C and stirred at 0 °C for 10 min. Then 2 mL of catalyst stock solution was transferred to the round bottom flask containing the starting materials using syringe and the obtained mixture was stirred at 0 °C for 12 h. Then the reaction was quenched by adding 1 mL of methanol followed by transferring the crude mixture of reaction to a 50 mL round bottom flask and evaporating the solvent under reduced pressure. The crude epoxide was purified via column chromatography (20 x 250 mm, 3:1 to 1:1 hexane: ethyl acetate as eluent) and epoxide **11**

was obtained as a yellowish oil in 80% (0.399 mmol, 142 mg) isolated yield. The enantiomeric excess of epoxide **11** was determined to be 96% with chiral HPLC (PIRKLE COVALENT (*R,R*) WHELK-O 1 column, 94:6 hexane/2-propanol at 228 nm, flow-rate: 1 mL/min): retention times:  $R_t = 18.9$  min (major enantiomer, ent-**11**) and  $R_t = 21.6$  min (minor enantiomer, **11**).

Spectral data for epoxide **11**:  $^1\text{H}$  NMR (500 MHz, Chloroform-*d*)  $\delta$  0.05 (s, 6H), 0.89 (s, 9H), 1.64 (ddt,  $J = 14.2, 7.4, 5.8$  Hz, 1H), 1.81 (dtd,  $J = 14.3, 6.5, 4.9$  Hz, 1H), 3.36 (dt,  $J = 7.5, 4.8$  Hz, 1H), 3.57 (d,  $J = 4.8$  Hz, 1H), 3.76 (t,  $J = 6.2$  Hz, 2H), 4.39 – 4.52 (m, 2H), 6.49 (t,  $J = 6.1$  Hz, 1H), 7.21 – 7.32 (m, 3H), 7.28 – 7.37 (m, 2H).  $^{13}\text{C}\{^1\text{H}\}$  NMR (126 MHz, Chloroform-*d*)  $\delta$  -5.34, -5.31, 15.39, 18.35, 25.96, 31.19, 43.09, 55.10, 56.41, 60.00, 127.84, 128.01, 128.89, 137.67, 167.34. IR: 3305brs, 2928w, 1660s, 1096s, 881s, 775s, 729m, 698s. HRMS (ESI-TOF)  $m/z$  336.2039, [(M+H<sup>+</sup>); calcd for C<sub>18</sub>H<sub>30</sub>NO<sub>3</sub>Si: 336.1994].

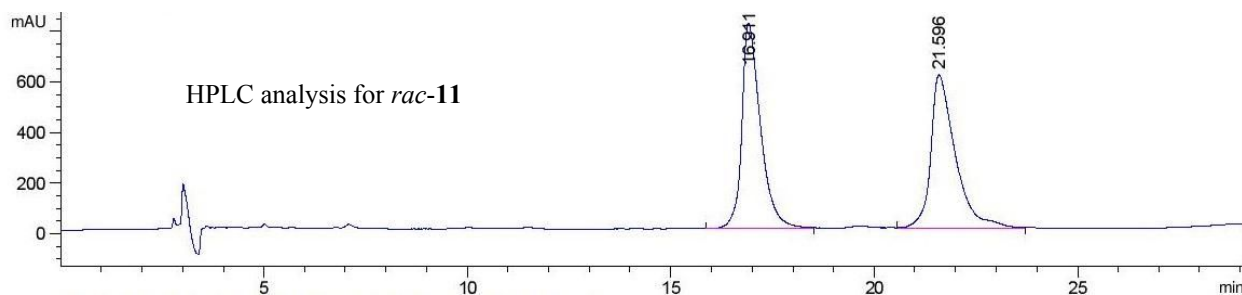

| Peak # | RetTime [min] | Type | Width [min] | Area [mAU*s] | Height [mAU] | Area %  |
|--------|---------------|------|-------------|--------------|--------------|---------|
| 1      | 16.911        | BV   | 0.4665      | 2.60566e4    | 811.68579    | 50.6110 |
| 2      | 21.596        | BV   | 0.5764      | 2.54275e4    | 604.91522    | 49.3890 |



Spectral data for epoxide **13**:  $^1\text{H}$  NMR (500 MHz, Chloroform-*d*)  $\delta$  0.03 (m, 6H), 0.88 (s, 9H), 1.61 (ddt,  $J = 14.2, 7.5, 5.8$  Hz, 1H), 1.71 – 1.84 (m, 1H), 3.34 (dt,  $J = 7.5, 4.8$  Hz, 1H), 3.55 (d,  $J = 4.8$  Hz, 1H), 3.71 – 3.81 (m, 5H), 4.38 (d,  $J = 5.9$  Hz, 2H), 6.40 (t,  $J = 6.2$  Hz, 1H), 6.82 – 6.89 (m, 2H), 7.15 – 7.23 (m, 2H).  $^{13}\text{C}\{^1\text{H}\}$  NMR (126 MHz, Chloroform-*d*)  $\delta$  -5.45, -5.42, 18.24, 25.85, 31.06, 42.43, 54.97, 55.27, 56.27, 59.89, 114.11, 129.25, 129.26, 129.64, 167.08. HRMS (ESI-TOF)  $m/z$  366.2136,  $[(\text{M}+\text{H}^+)]$ ; calcd for  $\text{C}_{19}\text{H}_{32}\text{NO}_4\text{Si}$ : 366.2100]. IR: 3310 brs, 2950w, 1654s, 1512s, 1247s, 1094s, 830s, 778s.  $[\alpha]^{20}_{\text{D}}$  ( $c$  1.0,  $\text{CHCl}_3$ ): 0.0481.

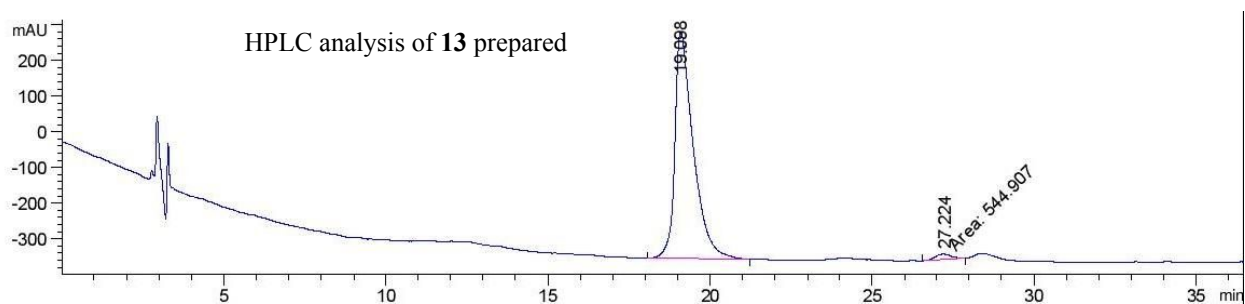

| Peak # | RetTime [min] | Type | Width [min] | Area [mAU*s] | Height [mAU] | Area %  |
|--------|---------------|------|-------------|--------------|--------------|---------|
| 1      | 19.100        | BB   | 0.5447      | 3385.00781   | 88.79678     | 97.9873 |
| 2      | 27.146        | MM   | 0.5293      | 69.52958     | 2.18919      | 2.0127  |

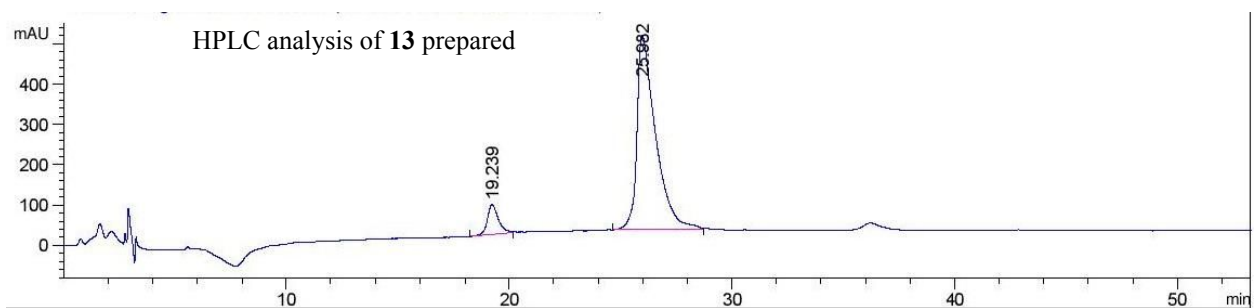

| Peak # | RetTime [min] | Type | Width [min] | Area [mAU*s] | Height [mAU] | Area %  |
|--------|---------------|------|-------------|--------------|--------------|---------|
| 1      | 19.239        | BV   | 0.4904      | 2550.96973   | 74.71109     | 8.2485  |
| 2      | 25.982        | VV   | 0.7682      | 2.83755e4    | 483.83984    | 91.7515 |

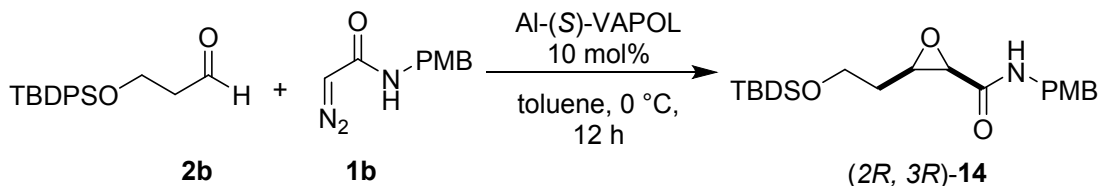

(2R,3R)-3-(2-((tert-butyl)diphenylsilyl)oxy)ethyl)-N-(4-methoxybenzyl)oxirane-2-carboxamide **14** (Table 1, entry 8): Epoxide **14** was synthesized from aldehyde **2b** (0.599 mmol, 188 mg) and diazo compound **1b** (0.499 mmol, 103 mg) catalyzed by aluminum-(S)-VAPOL catalyst prepared with the general procedure with a 12 h reaction time. The crude product was purified via column chromatography (20 x 250 mm, 3:1 to 1:1 hexane: ethyl acetate as eluent) and epoxide **14** was obtained as a yellowish oil in 77% (0.385 mmol, 188) isolated yield. The enantiomeric excess of epoxide **14** was determined to be 94% with chiral HPLC (PIRKLE COVALENT (R,R) WHELK-O 1 column, 93:7 hexane/2-propanol at 228 nm, flow-rate: 1 mL/min): retention times:  $R_t = 33.7$  min (minor enantiomer, ent-**14**) and  $R_t = 48.8$  min (major enantiomer, **14**).

Spectral data for epoxide **14**:  $^1\text{H}$  NMR (500 MHz, Chloroform-*d*)  $\delta$  1.07 (s, 9H), 1.07, 1.56 – 1.67 (m, 1H), 1.89 (dddd,  $J = 14.3, 7.1, 5.9, 4.5$  Hz, 1H), 3.40 – 3.54 (m, 1H), 3.57 (d,  $J = 4.8$  Hz, 1H), 3.78 (s, 3H), 3.77 – 3.87 (m, 2H), 4.37 (d,  $J = 5.9$  Hz, 2H), 6.37 (t,  $J = 5.9$  Hz, 1H), 6.81 – 6.90 (m, 2H), 7.14 – 7.21 (m, 2H), 7.36 – 7.43 (m, 4H), 7.40 – 7.48 (m, 2H), 7.63 – 7.70 (m, 4H).  $^{13}\text{C}\{^1\text{H}\}$  NMR (126 MHz, Chloroform-*d*)  $\delta$  15.41, 19.28, 26.90, 30.98, 42.52, 55.09, 55.37, 56.41, 60.96, 65.98, 114.23, 127.84, 127.85, 129.35, 129.75, 129.85, 129.87, 133.51, 133.54, 135.64, 159.24, 167.19. HRMS (ESI-TOF)  $m/z$  490.243, [(M+H) $^+$ ]; calcd for  $\text{C}_{29}\text{H}_{36}\text{NO}_4\text{Si}$ : 490.2413].  $[\alpha]_D^{20}$  ( $c$  1.0,  $\text{CHCl}_3$ ): -0.403.

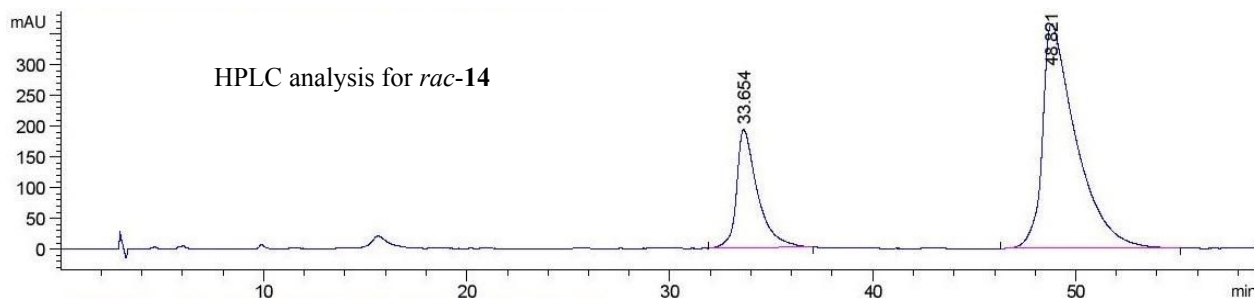

| Peak # | RetTime [min] | Type | Width [min] | Area [mAU*s] | Height [mAU] | Area %  |
|--------|---------------|------|-------------|--------------|--------------|---------|
| 1      | 33.654        | BB   | 1.0054      | 1.38466e4    | 192.46220    | 24.6439 |
| 2      | 48.821        | BB   | 1.4985      | 4.23401e4    | 366.29782    | 75.3561 |

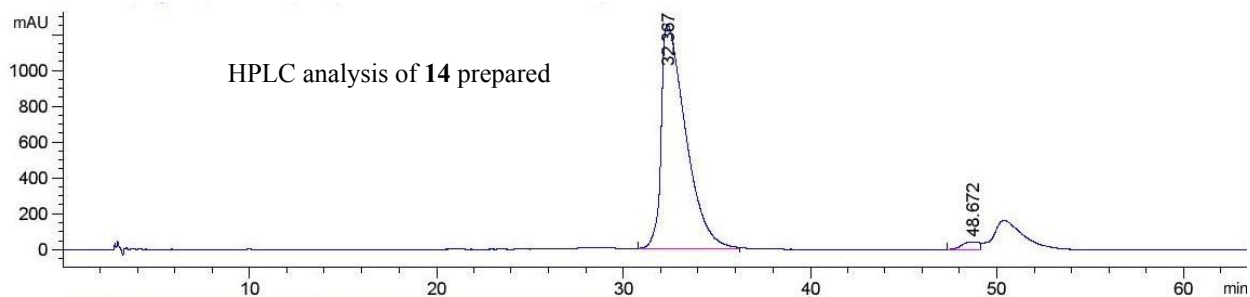

| Peak # | RetTime [min] | Type | Width [min] | Area [mAU*s] | Height [mAU] | Area %  |
|--------|---------------|------|-------------|--------------|--------------|---------|
| 1      | 32.367        | VV   | 1.0856      | 1.14078e5    | 1253.65527   | 97.7220 |
| 2      | 48.672        | BV   | 0.7357      | 2659.27246   | 42.51522     | 2.2780  |

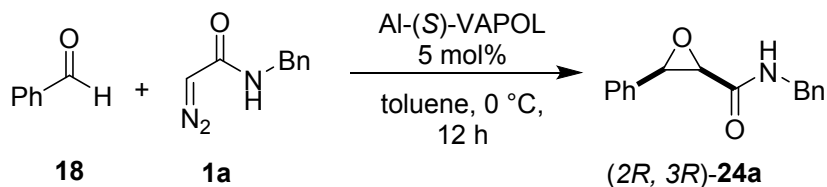

*(2R,3R)*-3-phenyl-*N*-benzyl-oxirane-2-carboxamide **24a**: Epoxide **24a** was synthesized from benzaldehyde **18** (0.59 mmol, 62  $\mu$ L) and diazo compound **1a** (0.49 mmol, 88 mg) catalyzed by aluminum-(*S*)-VAPOL catalyst prepared with the general procedure with a 12 h as the reaction



time. The crude product was purified via column chromatography (20 x 250 mm, 3:1 to 1:1 hexane: ethyl acetate as eluent) and epoxide **24a** was obtained as a white solid in 97% (0.485 mmol, 123 mg) isolated yield. The enantiomeric excess of epoxide **24a** was determined to be 99% with chiral HPLC (PIRKLE COVALENT (*R,R*) WHELK-O 1 column, 90:10 hexane/2-propanol at 228 nm, flow-rate: 1 mL/min): retention times:  $R_t = 31.4$  min (minor enantiomer, ent-**24a**) and  $R_t = 43.24$  min (major enantiomer, **24a**).

Spectral data for epoxide **24a**:  $^1\text{H}$  NMR (500 MHz, Chloroform-*d*)  $\delta$  7.40 – 7.27 (m, 5H), 7.24 – 7.13 (m, 3H), 6.75 – 6.69 (m, 2H), 6.19 (s, 1H), 4.38 – 4.27 (m, 2H), 4.07 (dd,  $J = 14.9, 4.9$  Hz, 1H), 3.85 (d,  $J = 4.8$  Hz, 1H).  $^{13}\text{C}\{^1\text{H}\}$  NMR (126 MHz, Chloroform-*d*)  $^{13}\text{C}$  NMR (126 MHz, Chloroform-*d*)  $\delta$  42.80, 56.46, 58.40, 126.67, 127.42, 127.53, 128.63, 128.66, 133.15, 137.11, 166.24. These spectral data are in good agreement with literature values.<sup>7</sup>

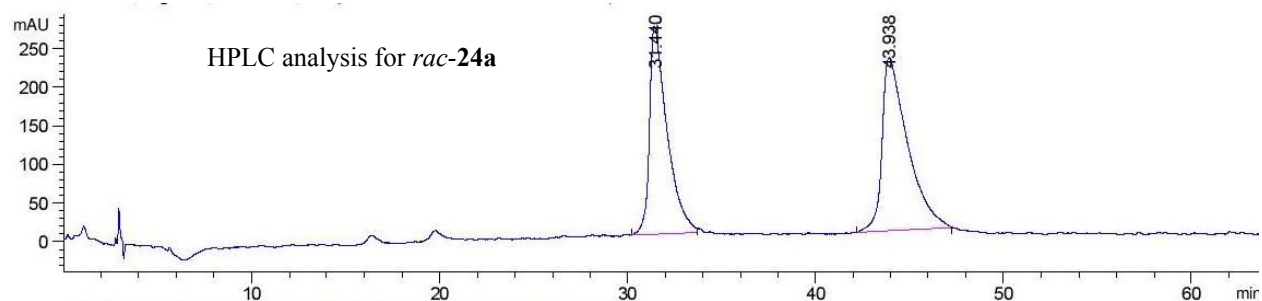

| Peak # | RetTime [min] | Type | Width [min] | Area [mAU*s] | Height [mAU] | Area %  |
|--------|---------------|------|-------------|--------------|--------------|---------|
| 1      | 31.440        | VV   | 0.8574      | 1.76355e4    | 269.50815    | 45.2891 |
| 2      | 43.938        | BV   | 1.1202      | 2.13044e4    | 224.28755    | 54.7109 |

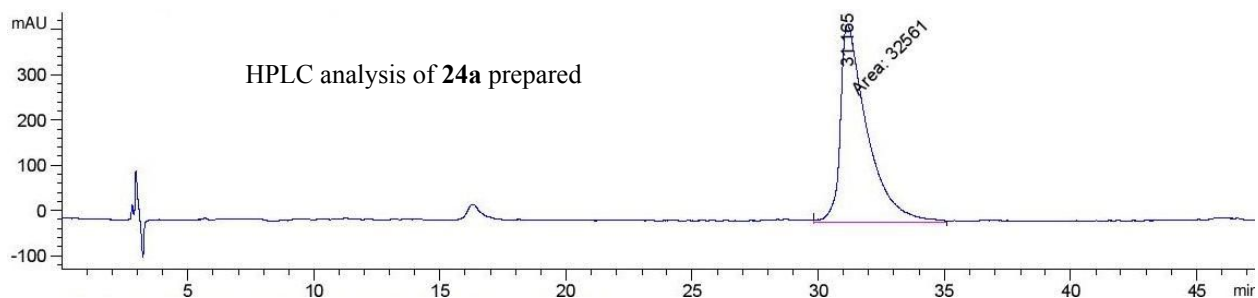

| Peak # | RetTime [min] | Type | Width [min] | Area [mAU*s] | Height [mAU] | Area %   |
|--------|---------------|------|-------------|--------------|--------------|----------|
| 1      | 31.165        | MM   | 1.2377      | 3.25610e4    | 438.44531    | 100.0000 |

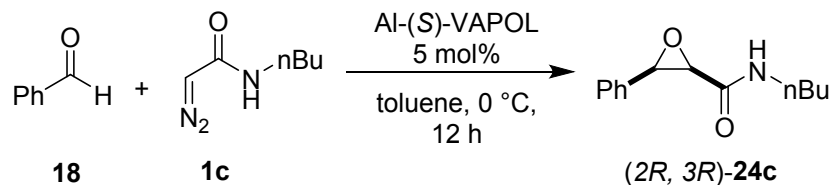

*(2R,3R)*-3-phenyl-*N*-(*n*-butyl)oxirane-2-carboxamide **24c**: Epoxide **24c** was synthesized from benzaldehyde **18** (0.59 mmol, 62  $\mu$ L) and diazo compound **1c** (0.50 mmol, 74 mg) catalyzed by aluminum-(*S*)-VAPOL catalyst prepared with the general procedure with a 12 h reaction time. The crude product was purified via column chromatography (20 x 250 mm, 3:1 to 1:1 hexane: ethyl acetate as eluent) and epoxide **24c** was obtained as a white solid in 86% (0.43 mmol, 94 mg) isolated yield. The enantiomeric excess of epoxide **24c** was determined to be 97% with chiral HPLC (PIRKLE COVALENT (*R,R*) WHELK-O 1 column, 93:7 hexane/2-propanol at 228 nm, flow-rate: 1 mL/min): retention times:  $R_t = 24.63$  min (minor enantiomer, ent-**24c**) and  $R_t = 31.46$  min (major enantiomer, **24c**).

Spectral data for epoxide **24c**:  $^1\text{H}$  NMR (500 MHz, Chloroform-*d*)  $\delta$  0.65 (t,  $J = 7.5$  Hz, 3H), 0.80-1.00 (m, 4H), 2.75-2.83 (m, 1H), 2.98-3.07 (m, 1H), 3.70 (d,  $J = 5.0$  Hz, 1H), 4.24 (d,  $J = 5.5$  Hz, 1H), 5.85 (brs, 1H), 7.20-7.32 (m, 5H);  $^{13}\text{C}\{^1\text{H}\}$  NMR (126 MHz, Chloroform-*d*)  $\delta$  13.62, 19.67, 31.23, 38.26, 56.34, 58.12, 126.54, 128.36, 128.43, 133.23, 166.02. These spectral data are in good agreement with literature values.<sup>7</sup>

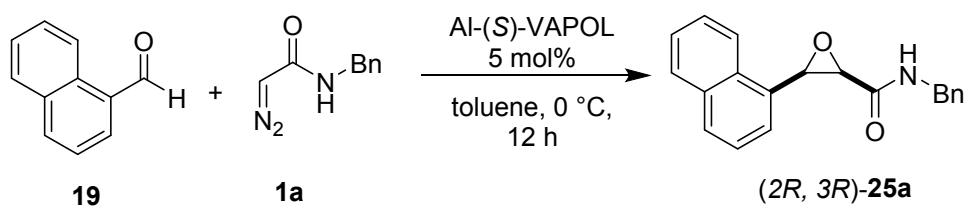

(*2R*, *3R*)-3-(naphthalene-1-yl)-*N*-benzyl-oxirane-2-carboxamide **25a**: Epoxide **25a** was synthesized from 1-naphthalenecarboxaldehyde **19** (0.60 mmol, 82  $\mu\text{L}$ ) and diazo compound **1a** (0.50 mmol, 88 mg) catalyzed by aluminum-(*S*)-VAPOL catalyst prepared with the general procedure with a 12 h reaction time. The crude product was purified via column chromatography (20 x 250 mm, 3:1 to 1:1 hexane: ethyl acetate as eluent) and epoxide **25a** was obtained as a white solid in 93% isolated yield (0.465 mmol, 141 mg). The enantiomeric excess of epoxide **25a** was determined to be 99% with chiral HPLC (PIRKLE COVALENT (*R,R*) WHELK-O 1 column, 85:15 hexane/2-propanol at 228 nm, flow-rate: 1 mL/min): retention times:  $R_t = 22.25$  min (minor enantiomer, ent-**25a**) and  $R_t = 64.47$  min (major enantiomer, **25a**). mp: 92-93  $^\circ\text{C}$ .

Spectral data for epoxide **25a**:  $^1\text{H}$  NMR (500 MHz, Chloroform-*d*)  $\delta$  3.94 (dd,  $J = 15.0, 4.9$  Hz, 1H), 4.10 (d,  $J = 4.7$  Hz, 1H), 4.22 (dd,  $J = 15.0, 7.1$  Hz, 1H), 4.72 (d,  $J = 4.7$  Hz, 1H), 6.06 (d,  $J = 6.1$  Hz, 1H), 6.43 – 6.49 (m, 2H), 6.98 – 7.05 (m, 2H), 7.07 – 7.14 (m, 1H), 7.33 (dd,  $J = 8.2, 7.0$  Hz, 1H), 7.48 (dt,  $J = 7.1, 1.2$  Hz, 1H), 7.56 (dddd,  $J = 19.5, 8.1, 6.8, 1.4$  Hz, 2H), 7.83 (dd,  $J$

= 8.3, 1.2 Hz, 1H), 7.87 – 7.93 (m, 1H), 8.10 – 8.16 (m, 1H).  $^{13}\text{C}\{^1\text{H}\}$ NMR (126 MHz, Chloroform-*d*)  $\delta$  42.66, 56.40, 57.75, 123.76, 124.66, 125.12, 126.58, 127.07, 127.18, 127.22, 128.46, 128.67, 129.16, 129.42, 131.18, 133.44, 137.05, 166.44. IR: 3334brs, 1651s, 1528s, 772m, 742s, 762s, 606s. HRMS (ESI-TOF)  $m/z$  304.1404, [(M+H) $^+$ ]; calcd for  $\text{C}_{20}\text{H}_{18}\text{NO}_2$ : 304.1337].  $[\alpha]_{\text{D}}^{20}$  (*c* 1.0,  $\text{CHCl}_3$ ): 1.2002.

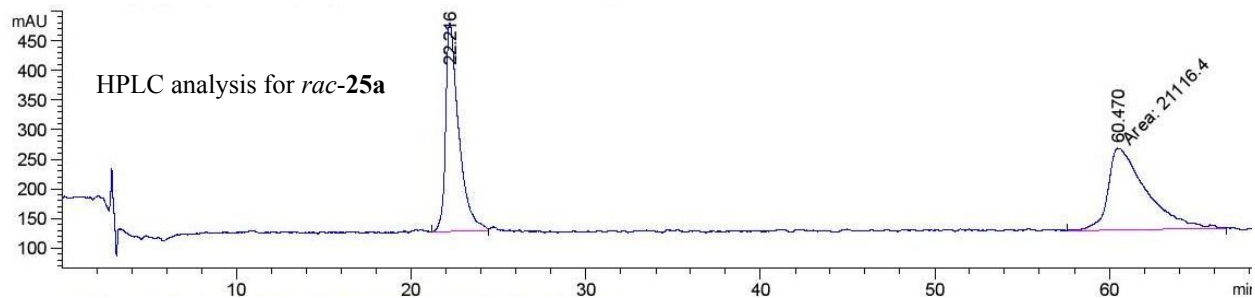

| Peak # | RetTime [min] | Type | Width [min] | Area [mAU*s] | Height [mAU] | Area %  |
|--------|---------------|------|-------------|--------------|--------------|---------|
| 1      | 22.216        | VV   | 0.6780      | 1.84987e4    | 352.62619    | 46.6960 |
| 2      | 60.470        | MM   | 2.5464      | 2.11164e4    | 138.21289    | 53.3040 |

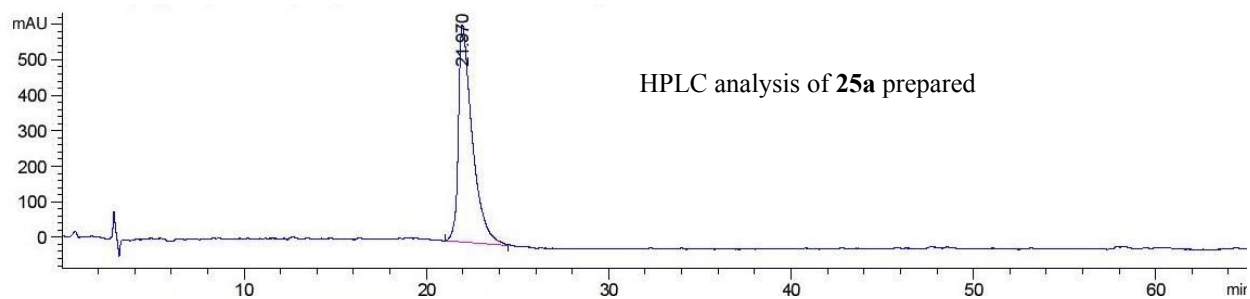

| Peak # | RetTime [min] | Type | Width [min] | Area [mAU*s] | Height [mAU] | Area %   |
|--------|---------------|------|-------------|--------------|--------------|----------|
| 1      | 21.970        | BV   | 0.7094      | 3.26369e4    | 612.77002    | 100.0000 |

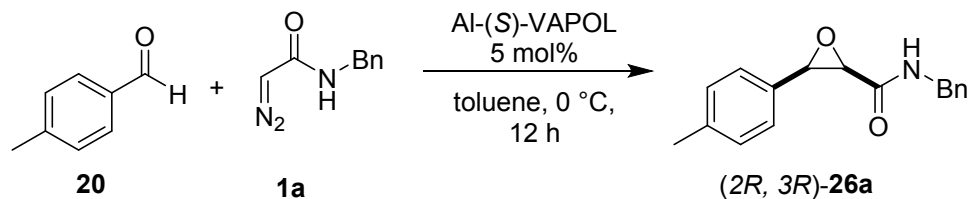

*(2R, 3R)*-3-(4-methyl-phenyl)-*N*-benzyl-oxirane-2-carboxamide **26a**: Epoxide **26a** was synthesized from aldehyde *para*-tolylaldehyde **20** (0.60 mmol, 71  $\mu$ L) and diazo compound **1a** (0.50 mmol, 88 mg) catalyzed by aluminum-(*S*)-VAPOL catalyst prepared with the general procedure with a 12 h reaction time. The crude product was purified via column chromatography (20 x 250 mm, 3:1 to 1:1 hexane: ethyl acetate as eluent) and epoxide **26a** was obtained as a white solid in 76% isolated yield (0.379 mmol 102 mg). The enantiomeric excess of epoxide **26a** was determined to be 99% with chiral HPLC (PIRKLE COVALENT (*R,R*) WHELK-O 1 column, 90:10 hexane/2-propanol at 228 nm, flow-rate: 1 mL/min): retention times:  $R_t = 30.45$  min (minor enantiomer, ent-**26a**) and  $R_t = 45.1$  min (major enantiomer, **26a**). mp: 76-77  $^\circ$ C.

Spectral data for epoxide **26a**:  $^1\text{H NMR}$  (500 MHz, Chloroform-*d*)  $\delta$  2.36 (s, 3H), 3.82 (d,  $J = 4.7$  Hz, 1H), 4.04 (dd,  $J = 14.9, 4.9$  Hz, 1H), 4.28 – 4.40 (m, 2H), 6.18 (t,  $J = 6.1$  Hz, 1H), 6.68 – 6.74 (m, 2H), 7.09 (d,  $J = 7.9$  Hz, 2H), 7.11 – 7.19 (m, 2H), 7.15 – 7.23 (m, 3H), 7.24 – 7.34 (m, 0H).  $^{13}\text{C}\{^1\text{H}\}$ NMR (126 MHz, Chloroform-*d*)  $\delta$  21.41, 42.77, 56.49, 58.36, 126.56, 127.33, 127.55, 127.91, 128.47, 128.79, 129.29, 130.11, 137.18, 138.33, 166.39. IR: 3290brs, 1659s, 1532s, 696s. HRMS (ESI-TOF)  $m/z$  268.1374, [(M+H) $^+$ ]; calcd for  $\text{C}_{17}\text{H}_{18}\text{NO}_2$ : 268.1337]  $[\alpha]^{20}_{\text{D}}$  (*c* 1.0,  $\text{CHCl}_3$ ): 0.273.

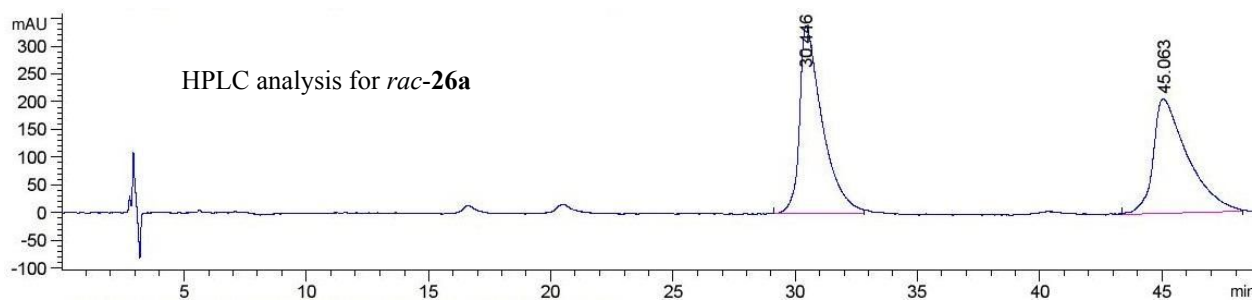

| Peak # | RetTime [min] | Type | Width [min] | Area [mAU*s] | Height [mAU] | Area %  |
|--------|---------------|------|-------------|--------------|--------------|---------|
| 1      | 30.446        | BV   | 0.8327      | 2.18385e4    | 338.48206    | 51.8648 |
| 2      | 45.063        | VV   | 1.1596      | 2.02681e4    | 206.76707    | 48.1352 |

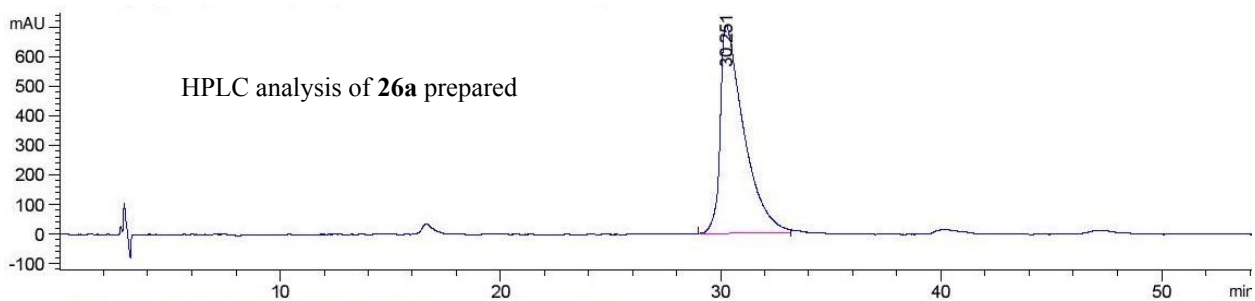

| Peak # | RetTime [min] | Type | Width [min] | Area [mAU*s] | Height [mAU] | Area %   |
|--------|---------------|------|-------------|--------------|--------------|----------|
| 1      | 30.251        | VV   | 0.8882      | 5.26027e4    | 706.88928    | 100.0000 |

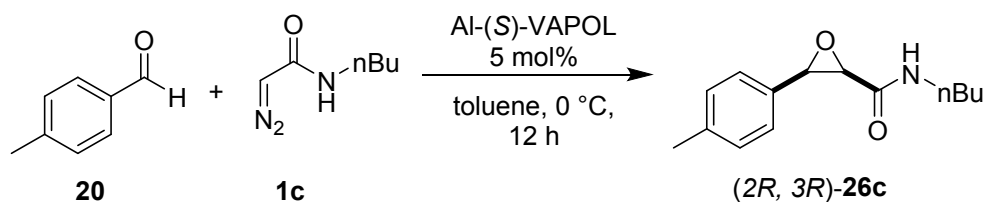

(2*R*, 3*R*)-3-(4-methyl-phenyl)-*N*-(*n*-butyl)-oxirane-2-carboxamide **26c**: Epoxide **26c** was synthesized from *para*-tolylaldehyde **20** (0.60 mmol, 71  $\mu$ L) and diazo compound **1c** (0.50 mmol, 74 mg) catalyzed by aluminum-(*S*)-VAPOL catalyst prepared with the general procedure with a

12 h reaction time. The crude product was purified via column chromatography (20 x 250 mm, 3:1 to 1:1 hexane: ethyl acetate as eluent) and epoxide **26c** was obtained as a white solid in 66% isolated yield (0.330 mmol, 79.3 mg). The enantiomeric excess of epoxide **26c** was determined to be 93% with chiral HPLC (PIRKLE COVALENT (*R,R*) WHELK-O 1 column, 93:7 hexane/2-propanol at 228 nm, flow-rate: 1 mL/min): retention times:  $R_t = 25.13$  min (minor enantiomer, ent-**26c**) and  $R_t = 37.54$  min (major enantiomer, **26c**).

Spectral data for epoxide **26c**:  $^1\text{H}$  NMR (500 MHz, Chloroform-*d*)  $\delta$  0.65 (t,  $J = 7.0$  Hz, 3H), 0.80-0.88 (m, 2H), 0.91-0.99 (m, 2H), 2.25 (s, 3H), 2.74-2.82 (m, 1H), 3.01-3.10 (m, 1H), 3.67 (d,  $J = 4.5$  Hz, 1H), 4.20 (d,  $J = 4.5$  Hz, 1H), 5.84 (brs, 1H), 7.06 (d,  $J = 7.5$  Hz, 2H), 7.16 (d,  $J = 8.0$  Hz, 2H);  $^{13}\text{C}\{^1\text{H}\}$  NMR (126 MHz, Chloroform-*d*)  $\delta$  13.66, 19.70, 21.20, 31.32, 38.29, 56.37, 58.11, 126.47, 129.02, 130.24, 138.21, 166.17. These spectral data are in good agreement with literature values.<sup>7</sup>

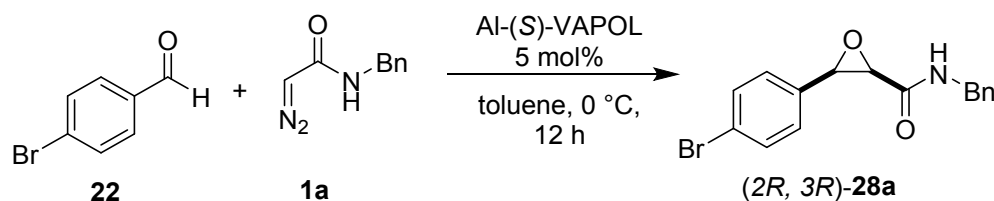

(*2R*, *3R*)-3-(4-bromo-phenyl)-*N*-benzyl-oxirane-2-carboxamide **28a**: Epoxide **28a** was synthesized from *para*-bromobenzaldehyde **22** (0.591 mmol, 111 mg) and diazo compound **1a** (0.50 mmol, 88 mg) catalyzed by aluminum-(*S*)-VAPOL catalyst prepared with the general procedure with a 12 h reaction time. The crude product was purified via column chromatography (20 x 250 mm, 3:1 to 1:1 hexane: ethyl acetate as eluent) and epoxide **28a** was obtained as a white solid in 90% isolated yield (0.395 mmol, 131 mg). The enantiomeric excess of epoxide **28a** was determined to be 99% with chiral HPLC (PIRKLE COVALENT (*R,R*) WHELK-O 1 column,

85:15 hexane/2-propanol at 228 nm, flow-rate: 1 mL/min): retention times:  $R_t = 21.26$  min (minor enantiomer, ent-**28a**) and  $R_t = 29.18$  min (major enantiomer, **28a**).

Spectral data for epoxide **28a**:  $^1\text{H}$  NMR (500 MHz, Chloroform-*d*)  $\delta$  3.85 (d,  $J = 4.8$  Hz, 1H), 4.00 (dd,  $J = 14.8, 4.6$  Hz, 1H), 4.28 (d,  $J = 4.8$  Hz, 1H), 4.44 (dd,  $J = 14.7, 7.5$  Hz, 1H), 6.15 (t,  $J = 5.9$  Hz, 1H), 6.70 – 6.76 (m, 2H), 7.16 – 7.29 (m, 5H), 7.36 – 7.43 (m, 2H).  $^{13}\text{C}\{^1\text{H}\}$  NMR (126 MHz, Chloroform-*d*)  $\delta$  42.84, 56.38, 57.78, 122.83, 127.60, 127.65, 128.36, 128.72, 131.83, 132.13, 137.07, 165.79. These spectral data are in good agreement with literature values.<sup>7</sup>

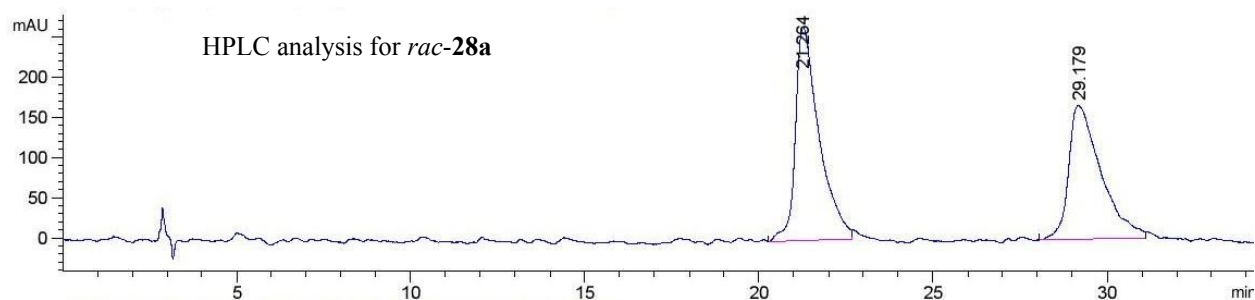

| Peak # | RetTime [min] | Type | Width [min] | Area [mAU*s] | Height [mAU] | Area %  |
|--------|---------------|------|-------------|--------------|--------------|---------|
| 1      | 21.264        | BV   | 0.6406      | 1.26518e4    | 266.14322    | 53.8332 |
| 2      | 29.179        | VV   | 0.7707      | 1.08500e4    | 166.84195    | 46.1668 |

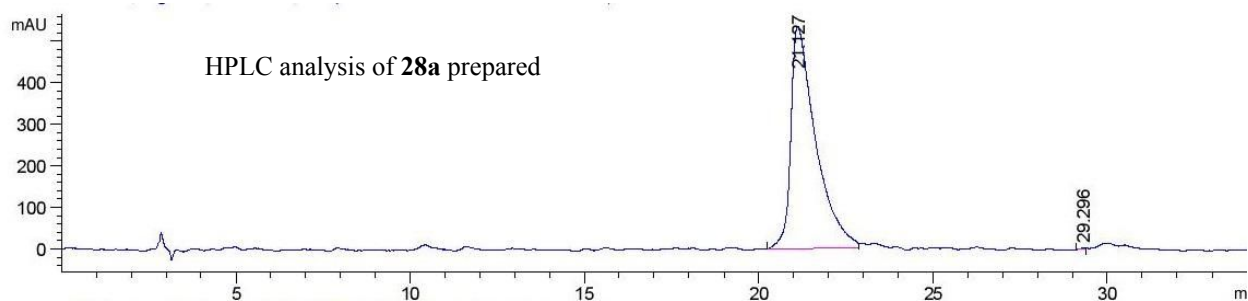



| Peak # | RetTime [min] | Type | Width [min] | Area [mAU*s] | Height [mAU] | Area %  |
|--------|---------------|------|-------------|--------------|--------------|---------|
| 1      | 21.127        | VV   | 0.6532      | 2.66842e4    | 535.65259    | 99.9119 |
| 2      | 29.296        | BV   | 0.1308      | 23.53535     | 2.43379      | 0.0881  |

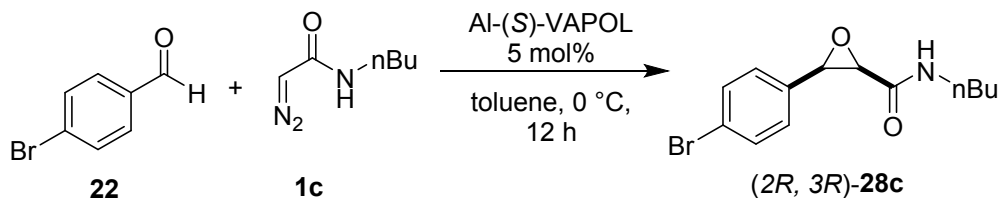

*(2R, 3R)*-3-(4-bromo-phenyl)-*N*-(*n*-butyl)-oxirane-2-carboxamide **28c**: Epoxide **28c** was synthesized from *para*-bromobenzaldehyde **22** (0.590 mmol, 111 mg) and diazo compound **1c** (0.50 mmol, 74 mg) catalyzed by aluminum-(*S*)-VAPOL catalyst prepared with the general procedure with a 12 h reaction time. The crude product was purified via column chromatography (20 x 250 mm, 3:1 to 1:1 hexane: ethyl acetate as eluent) and epoxide **28c** was obtained as a white solid in 77% isolated yield (0.385 mmol, 115 mg). The enantiomeric excess of epoxide **28c** was determined to be 85% with chiral HPLC (PIRKLE COVALENT (*R,R*) WHELK-O 1 column, 90:10 hexane/2-propanol at 228 nm, flow-rate: 1 mL/min): retention times:  $R_t = 18.05$  min (minor enantiomer, *ent*-**28c**) and  $R_t = 26.19$  min (major enantiomer, **28c**).

Spectral data for epoxide **28c**:  $^1\text{H}$  NMR (500 MHz, Chloroform-*d*)  $\delta$  0.70 (t,  $J = 7.5$  Hz, 3H), 0.86-0.95 (m, 2H), 0.99-1.06 (m, 2H), 2.77-2.85 (m, 1H), 3.02-3.12 (m, 1H), 3.71 (d,  $J = 4.5$  Hz, 1H), 4.19 (d,  $J = 4.0$  Hz, 1H), 5.87 (brs, 1H), 7.17 (d,  $J = 7.5$  Hz, 2H), 7.40 (d,  $J = 7.5$  Hz, 2H).  $^{13}\text{C}\{^1\text{H}\}$  NMR (126 MHz, Chloroform-*d*)  $\delta$  13.67, 19.73, 31.36, 38.34, 56.29, 57.50, 122.57, 128.30, 131.52, 132.30, 165.64. These spectral data are in good agreement with literature values.<sup>7</sup>

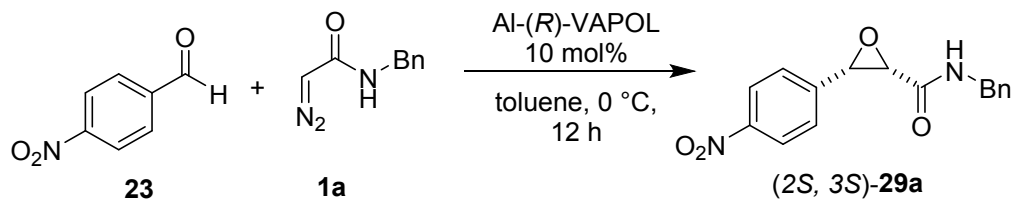

(*2S,3S*)-3-(4-nitro-phenyl)-*N*-benzyl-oxirane-2-carboxamide **29a**: Epoxide **29a** was synthesized from *para*-nitrobenzaldehyde **23** (0.590 mmol, 111 mg) and diazo compound **1a** (0.50 mmol, 74 mg) catalyzed by aluminum-(*R*)-VAPOL catalyst prepared with the general procedure with a 12 h reaction time. The crude product was purified via column chromatography (20 x 250 mm, 3:1 to 1:1 hexane: ethyl acetate as eluent) and epoxide **29a** was obtained as a white solid in 70% isolated yield (0.350 mmol, 105 mg). The enantiomeric excess of epoxide **29a** was determined to be 93% with chiral HPLC (PIRKLE COVALENT (*R,R*) WHELK-O 1 column, 85:15 hexane/2-propanol at 228 nm, flow-rate: 1 mL/min): retention times:  $R_t = 39.79$  min (major enantiomer, ent-**29a**) and  $R_t = 48.53$  min (minor enantiomer, **29a**). mp: 116-117 °C.

Spectral data for epoxide **29a**:  $^1\text{H NMR}$  (500 MHz, Chloroform-*d*)  $\delta$  3.89 – 3.99 (m, 2H), 4.38 (d,  $J = 4.9$  Hz, 1H), 4.44 (dd,  $J = 14.5, 7.9$  Hz, 1H), 6.17 (s, 1H), 6.77 – 6.83 (m, 2H), 7.13 (ddt,  $J = 8.3, 6.5, 1.4$  Hz, 2H), 7.15 – 7.23 (m, 1H), 7.40 – 7.47 (m, 2H), 7.99 – 8.06 (m, 2H).  $^{13}\text{C}\{^1\text{H}\}$ NMR (126 MHz, Chloroform-*d*)  $\delta$  42.82, 56.41, 57.38, 123.71, 127.53, 127.80, 127.87, 128.63, 137.20, 139.94, 147.99, 165.03. IR: 3314brs, 1665s, 1512s, 1342s, 743m, 668s. HRMS (ESI-TOF)  $m/z$  299.1056, [(M+H) $^+$ ]; calcd for  $\text{C}_{16}\text{H}_{15}\text{N}_2\text{O}_4$ : 299.1031  $[\alpha]^{20}_{\text{D}}$  (*c* 1.0,  $\text{CHCl}_3$ ): 0.9559.

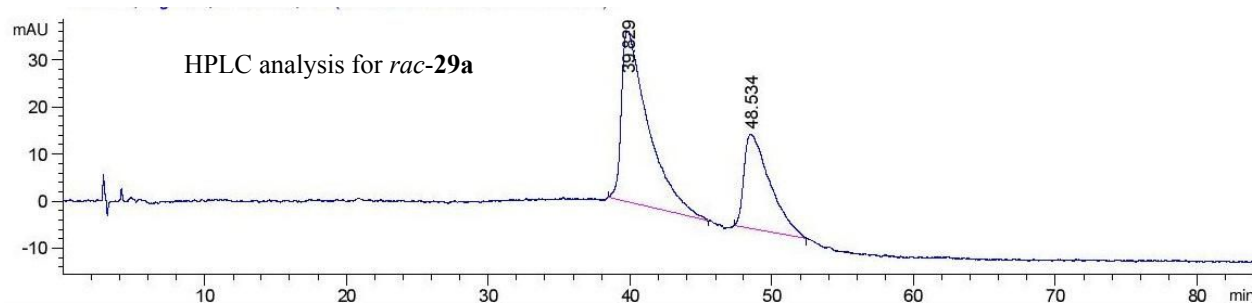

| Peak # | RetTime [min] | Type | Width [min] | Area [mAU*s] | Height [mAU] | Area %  |
|--------|---------------|------|-------------|--------------|--------------|---------|
| 1      | 39.829        | BB   | 1.5583      | 4810.85547   | 36.39244     | 65.2204 |
| 2      | 48.534        | BB   | 1.4993      | 2565.44922   | 20.15129     | 34.7796 |

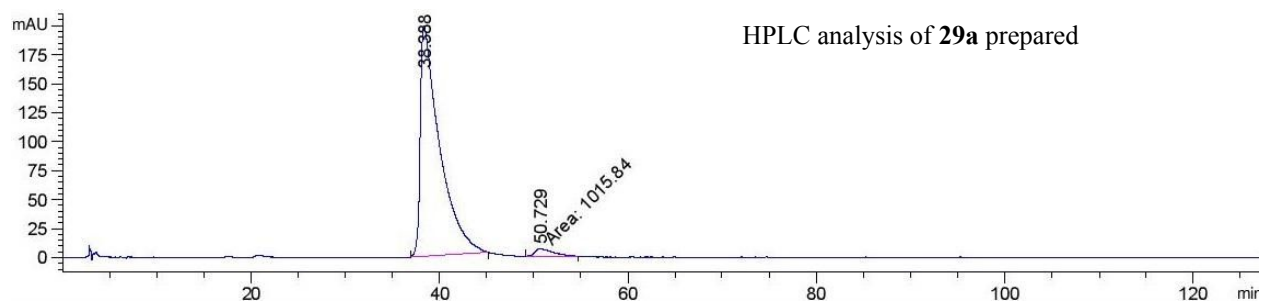

| Peak # | RetTime [min] | Type | Width [min] | Area [mAU*s] | Height [mAU] | Area %  |
|--------|---------------|------|-------------|--------------|--------------|---------|
| 1      | 38.388        | BB   | 1.8232      | 2.84159e4    | 199.09048    | 96.5485 |
| 2      | 50.729        | MM   | 2.5603      | 1015.84143   | 6.61275      | 3.4515  |

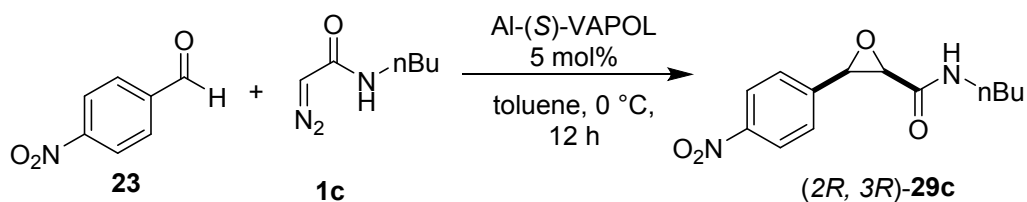

(2R, 3R)-3-(4-nitro-phenyl)-N-benzyl-oxirane-2-carboxamide **29c**: Epoxide **29c** was synthesized from *para*-nitrobenzaldehyde **23** (0.590 mmol, 111 mg) and diazo compound **1c** (0.50 mmol, 74



rate: 1 mL/min): retention times:  $R_t = 18.26$  min (minor enantiomer, ent-**36a**) and  $R_t = 22.08$  min (major enantiomer, **36a**).

Spectral data for epoxide **36a**:  $^1\text{H}$  NMR (500 MHz, Chloroform-*d*)  $\delta$  0.82 (t,  $J = 7.0$  Hz, 3H), 1.38 (m, 4H), 3.06 (d,  $J = 4.5$  Hz, 1H), 3.43 (d,  $J = 4.5$  Hz, 1H), 4.31 (dd,  $J = 14.5, 5.5$  Hz, 1H), 4.43 (dd,  $J = 14.5, 6.0$  Hz, 1H), 6.52 (brs, 1H), 7.17-7.25 (m, 5H).  $^{13}\text{C}\{^1\text{H}\}$  NMR (126 MHz, Chloroform-*d*)  $\delta$  13.95, 19.51, 29.77, 43.07, 55.36, 58.68, 127.85, 128.05, 128.89, 137.80, 167.45.

These spectral data are in good agreement with literature values.<sup>7</sup>

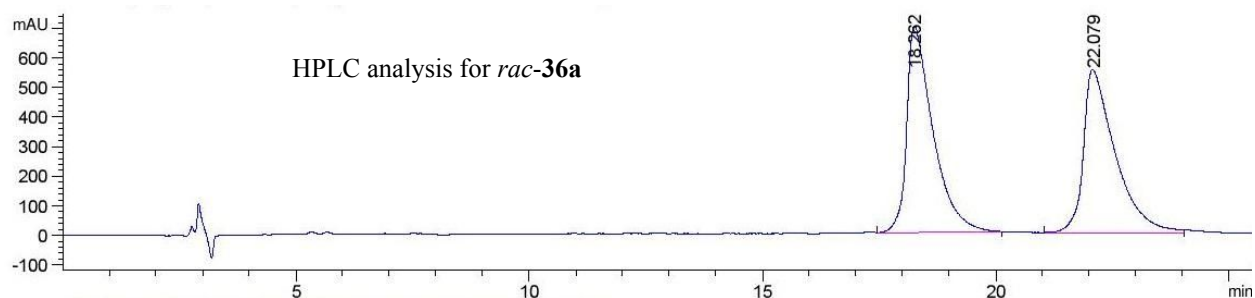

| Peak # | RetTime [min] | Type | Width [min] | Area [mAU*s] | Height [mAU] | Area %  |
|--------|---------------|------|-------------|--------------|--------------|---------|
| 1      | 18.262        | VV   | 0.5306      | 2.74908e4    | 699.40930    | 51.1894 |
| 2      | 22.079        | BV   | 0.6446      | 2.62133e4    | 551.46143    | 48.8106 |

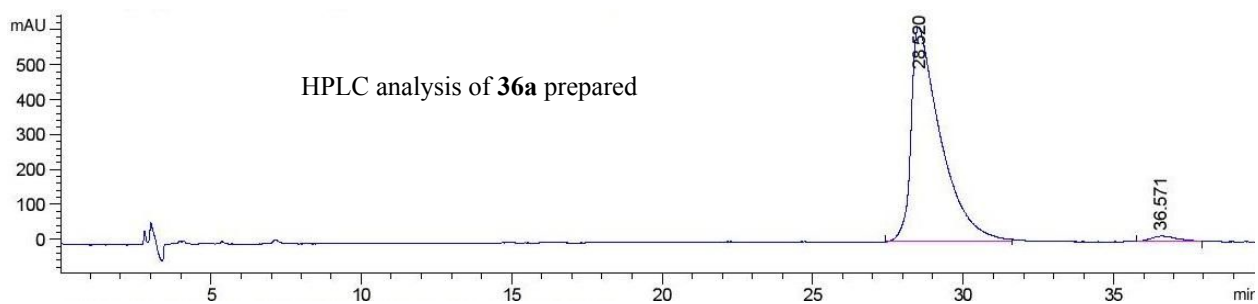



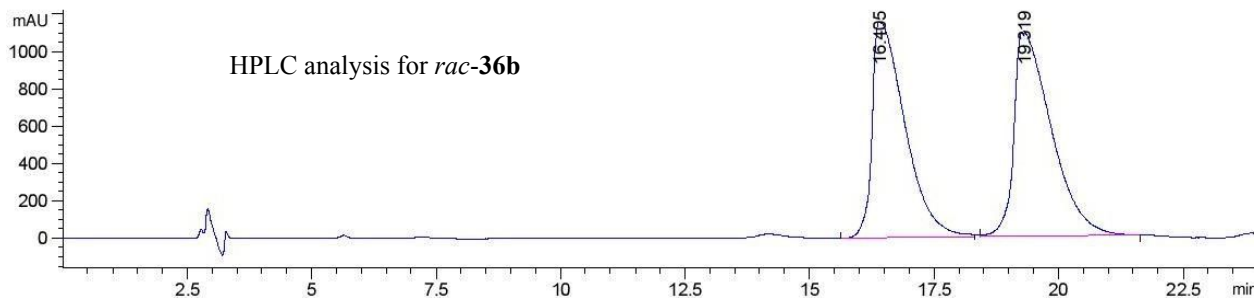

| Peak # | RetTime [min] | Type | Width [min] | Area [mAU*s] | Height [mAU] | Area %  |
|--------|---------------|------|-------------|--------------|--------------|---------|
| 1      | 16.405        | BV   | 0.5870      | 5.32234e4    | 1156.26392   | 48.0871 |
| 2      | 19.319        | VB   | 0.6284      | 5.74579e4    | 1098.17993   | 51.9129 |

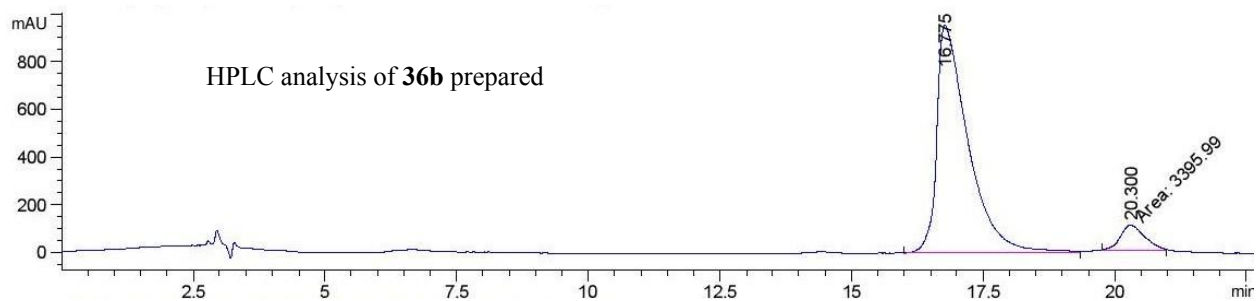

| Peak # | RetTime [min] | Type | Width [min] | Area [mAU*s] | Height [mAU] | Area %  |
|--------|---------------|------|-------------|--------------|--------------|---------|
| 1      | 16.775        | VV   | 0.5524      | 3.98856e4    | 956.76483    | 92.1537 |
| 2      | 20.300        | MM   | 0.5416      | 3395.99268   | 104.50947    | 7.8463  |

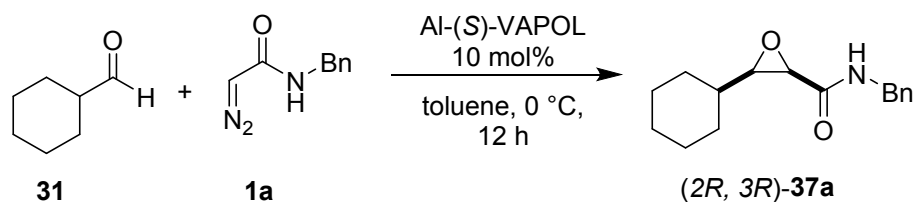

*(2R, 3R)*-3-cyclohexyl-*N*-benzyl-oxirane-2-carboxamide **37a**: Epoxide **37a** was synthesized from cyclohexanecarboxaldehyde **31** (0.60 mmol, 73  $\mu$ L) and diazo compound **1a** (0.50 mmol, 88 mg) catalyzed by aluminum-(*S*)-VAPOL catalyst prepared with the general procedure with a 12 h

reaction time. The crude product was purified via column chromatography (20 x 250 mm, 3:1 to 1:1 hexane: ethyl acetate as eluent) and epoxide **37a** was obtained as a white solid in 68% isolated yield (0.34 mmol, 89 mg). The enantiomeric excess of epoxide **37a** was determined to be 88% with chiral HPLC (PIRKLE COVALENT (*R,R*) WHELK-O 1 column, 90:10 hexane/2-propanol at 228 nm, flow-rate: 1 mL/min): retention times:  $R_t = 16.42$  min (minor enantiomer, ent-**37a**) and  $R_t = 19.29$  min (major enantiomer, **37a**).

Spectral data for epoxide **37a**:  $^1\text{H NMR}$  (500 MHz, Chloroform-*d*)  $\delta$  0.85-1.10 (m, 6H), 1.52-1.61 (m, 4H), 1.75 (d,  $J = 11.0$  Hz, 1H), 2.79 (s, 1H), 3.45 (d,  $J = 3.5$  Hz, 1H), 4.22 (dd,  $J = 14.5, 5.0$  Hz, 1H), 4.55 (dd,  $J = 14.5, 7.0$  Hz, 1H), 6.51 (brs, 1H), 7.18-7.25 (m, 5H).  $^{13}\text{C}\{^1\text{H}\}$ NMR (126 MHz, Chloroform-*d*)  $\delta$  25.32, 26.10, 28.49, 30.56, 36.79, 42.99, 55.37, 62.92, 127.82, 128.06, 128.90, 137.99, 167.52. (one  $\text{sp}^3$  carbon not located). These spectral data were in agreement with literature values.<sup>7</sup>

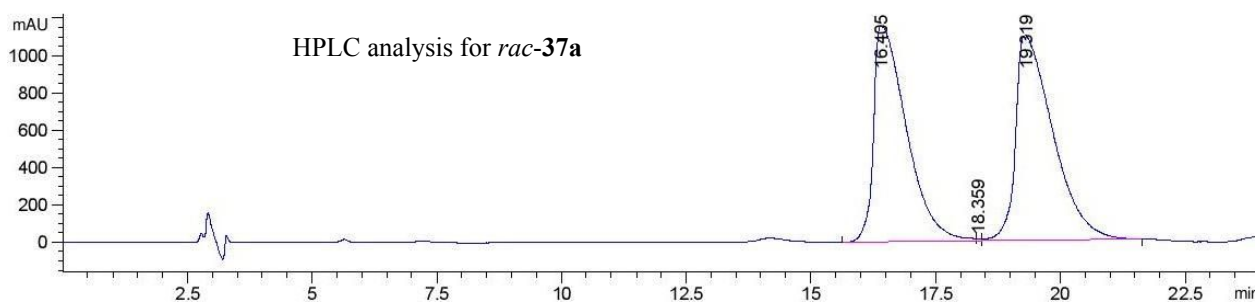

| Peak # | RetTime [min] | Type | Width [min] | Area [mAU*s] | Height [mAU] | Area %  |
|--------|---------------|------|-------------|--------------|--------------|---------|
| 1      | 16.405        | BV   | 0.5870      | 5.32234e4    | 1156.26392   | 48.0553 |
| 2      | 18.359        | VV   | 0.0819      | 73.07272     | 11.54043     | 0.0660  |
| 3      | 19.319        | VB   | 0.6284      | 5.74579e4    | 1098.17993   | 51.8787 |



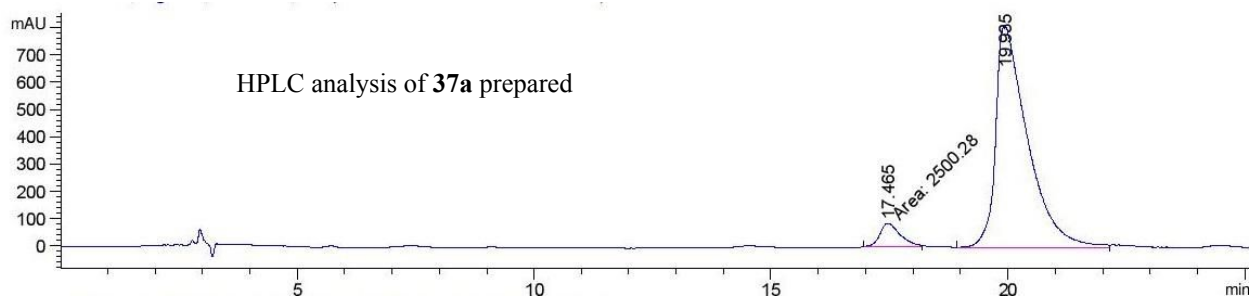

| Peak # | RetTime [min] | Type | Width [min] | Area [mAU*s] | Height [mAU] | Area %  |
|--------|---------------|------|-------------|--------------|--------------|---------|
| 1      | 17.465        | MM   | 0.4949      | 2500.28467   | 84.20614     | 6.1641  |
| 2      | 19.935        | BV   | 0.6226      | 3.80618e4    | 815.42004    | 93.8359 |

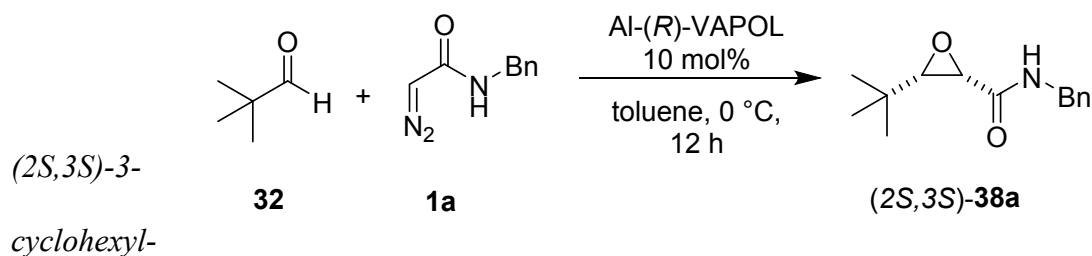

*N*-benzyl-oxirane-2-carboxamide **38a**: Epoxide **38a** was synthesized from 2,2-dimethylpropanal **32** (0.60 mmol, 65  $\mu$ L) and diazo compound **1a** (0.50 mmol, 88 mg) catalyzed by aluminum-(*R*)-VAPOL catalyst prepared under explained general procedure with a 12 h as the reaction time. The crude product was purified via column chromatography (20 x 250 mm, 3:1 to 1:1 hexane: ethyl acetate as eluent) and epoxide **38a** was obtained as a white solid in 50% isolated yield (0.250 mmol, 58.3 mg). The enantiomeric excess of epoxide **38a** was determined to be 99% with chiral HPLC (Daicel Chirapak OD-H column, 94:6 hexane/2-propanol at 228 nm, flow-rate: 1 mL/min): retention times:  $R_t = 7.14$  min (major enantiomer, ent-**38a**) and  $R_t = 13.32$  min (minor enantiomer, **38a**).

Spectral data for epoxide **38a**:  $^1\text{H}$  NMR (500 MHz, Chloroform-*d*)  $\delta$  0.89 (s, 9H), 1.47 (d,  $J = 5.0$  Hz, 1H), 1.37 (d,  $J = 5.0$  Hz, 1H), 4.20 (dd,  $J = 14.0, 5.0$  Hz, 1H), 4.48 (dd,  $J = 14.0, 6.0$  Hz, 1H), 6.45 (brs, 1H), 7.20-7.30 (m, 5H).  $^{13}\text{C}\{^1\text{H}\}$ NMR (126 MHz, Chloroform-*d*)  $\delta$  26.66, 31.97, 43.55, 56.13, 67.46, 127.94, 128.44, 128.91, 137.08, 167.41. These spectral data were in agreement with the literature values.<sup>7</sup>

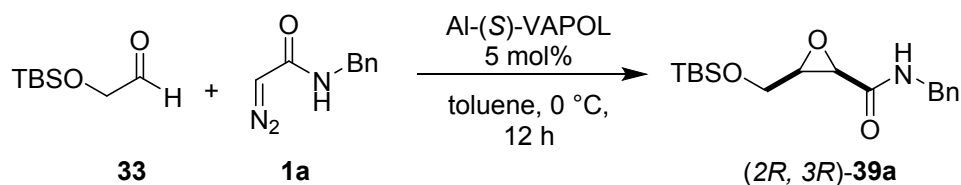

*(2R,3R)*-3-(2-((*tert*-butyldimethylsilyl)oxy)methyl)-*N*-benzyl-oxirane-2-carboxamide                      **39a**:

Epoxide **39a** was synthesized from 2-((*tert*-butyldimethylsilyl)oxy)acetaldehyde **33** (0.590 mmol, 115  $\mu\text{L}$ ) and diazo compound **1a** (0.50 mmol, 88 mg) catalyzed by aluminum-(*S*)-VAPOL catalyst prepared with the general procedure with a 12 h reaction time. The crude product was purified via column chromatography (20 x 250 mm, 3:1 to 1:1 hexane: ethyl acetate as eluent) and epoxide **39a** was obtained as a yellowish oil in 78% isolated yield (0.390 mmol, 125 mg). The enantiomeric excess of epoxide **39a** was determined to be 56% with chiral HPLC (PIRKLE COVALENT (*R,R*) WHELK-O 1 column, 90:10 hexane/2-propanol at 228 nm, flow-rate: 1 mL/min): retention times:  $R_t = 20.67$  min (minor enantiomer, ent-**39a**) and  $R_t = 22.98$  min (major enantiomer, **39a**).

Spectral data for epoxide **39a**:  $^1\text{H}$  NMR (500 MHz, Chloroform-*d*)  $\delta$  -0.02 (s, 6H), 0.86 (s, 9H), 3.32 – 3.39 (m, 1H), 3.43 – 3.51 (m, 1H), 3.59 (d,  $J = 4.8$  Hz, 1H), 3.88 (dd,  $J = 12.1, 3.2$  Hz, 1H), 4.36 (dd,  $J = 14.6, 5.6$  Hz, 1H), 4.53 (dd,  $J = 14.5, 6.5$  Hz, 1H), 6.48 (d,  $J = 6.3$  Hz, 1H), 7.23 – 7.33 (m, 3H), 7.30 – 7.37 (m, 2H).  $^{13}\text{C}\{^1\text{H}\}$ NMR (126 MHz, Chloroform-*d*)  $\delta$  -5.28, -5.26, 18.39, 25.91, 43.11, 54.16, 58.87, 61.35, 127.93, 128.08, 128.96, 137.56, 166.60. IR: 3299brs, 2930w,

1658s, 1512s, 1248s, 1092s, 1034m, 834s, 776m. HRMS (ESI-TOF)  $m/z$  322.1872, [(M+H)<sup>+</sup>];  
 calcd for C<sub>17</sub>H<sub>28</sub>NO<sub>3</sub>Si: 322.1838]. [ $\alpha$ ]<sup>20</sup><sub>D</sub> (*c* 1.0, CHCl<sub>3</sub>): 0.252.

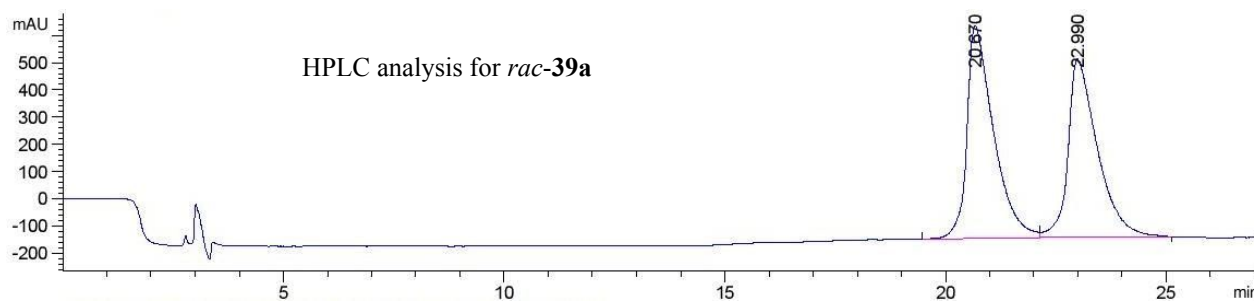

| Peak # | RetTime [min] | Type | Width [min] | Area [mAU*s] | Height [mAU] | Area %  |
|--------|---------------|------|-------------|--------------|--------------|---------|
| 1      | 20.669        | BB   | 0.5439      | 1214.69629   | 31.21845     | 51.6065 |
| 2      | 22.983        | BB   | 0.5867      | 1139.07019   | 25.61986     | 48.3935 |

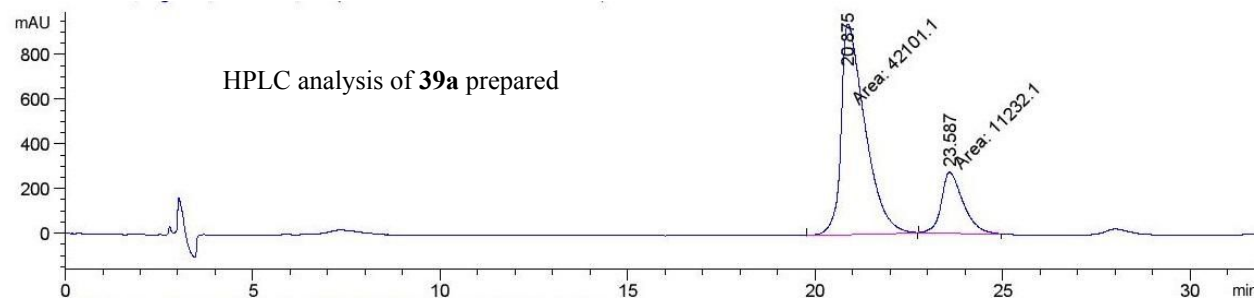

| Peak # | RetTime [min] | Type | Width [min] | Area [mAU*s] | Height [mAU] | Area %  |
|--------|---------------|------|-------------|--------------|--------------|---------|
| 1      | 20.875        | MM   | 0.7439      | 4.21011e4    | 943.29700    | 78.9397 |
| 2      | 23.587        | MM   | 0.6821      | 1.12321e4    | 274.46686    | 21.0603 |

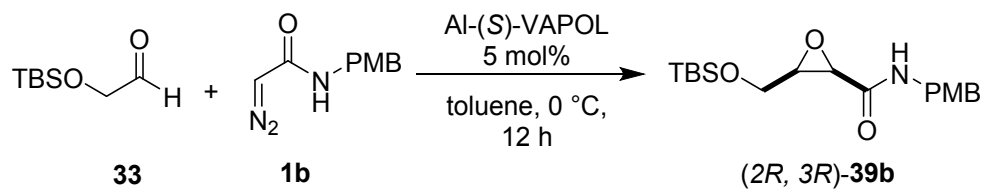

(2*R*,3*R*)-3-(2-((*tert*-butyldimethylsilyl)oxy)methyl)-*N*-(4-methoxy-phenyl)-oxirane-2-carboxamide

**39b**: Epoxide **39b** was synthesized from 2-((*tert*-butyldimethylsilyl)oxy)acetaldehyde **33** (0.590 mmol, 115  $\mu$ L) and diazo compound **1b** (0.490 mmol, 103 mg) catalyzed by aluminum-(*S*)-VAPOL catalyst prepared under explained general procedure with a 12 h as the reaction time. The crude product was purified via column chromatography (20 x 250 mm, 3:1 to 1:1 hexane: ethyl acetate as eluent) and epoxide **39b** was obtained as a yellowish oil in 73% isolated yield (0.365 mmol, 128 mg). The enantiomeric excess of epoxide **39b** was determined to be 50% with chiral HPLC (PIRKLE COVALENT (*R,R*) WHELK-O 1 column, 90:10 hexane/2-propanol at 228 nm, flow-rate: 1 mL/min): retention times:  $R_t = 19.69$  min (minor enantiomer, ent-**39b**) and  $R_t = 23.44$  min (major enantiomer, **39b**).

Spectral data for epoxide **39b**:  $^1\text{H}$  NMR (500 MHz, Chloroform-*d*)  $\delta$  0.03 (s, 6H), 0.86 (s, 9H), 3.30 – 3.37 (m, 1H), 3.40 – 3.50 (m, 1H), 3.56 (d,  $J = 4.8$  Hz, 1H), 3.79 (s, 2H), 3.86 (dd,  $J = 12.1$ , 3.1 Hz, 1H), 4.28 (dd,  $J = 14.4$ , 5.5 Hz, 1H), 4.46 (dd,  $J = 14.4$ , 6.5 Hz, 1H), 6.44 (t,  $J = 6.0$  Hz, 1H), 6.81 – 6.88 (m, 2H), 7.13 – 7.23 (m, 2H).  $^{13}\text{C}\{^1\text{H}\}$  NMR (126 MHz, Chloroform-*d*)  $\delta$  -5.27, -5.25, 18.40, 25.91, 42.56, 54.15, 55.39, 58.86, 61.34, 114.31, 129.46, 129.70, 159.33, 166.49. IR: 3299brs, 2928w, 1661s, 1092s, 834s, 777m, 731w, 697m. HRMS (ESI-TOF)  $m/z$  352.1964, [( $\text{M}+\text{H}^+$ ); calcd for  $\text{C}_{18}\text{H}_{30}\text{NO}_4\text{Si}$ : 352.1944].  $[\alpha]_D^{20}$  ( $c$  1.0,  $\text{CHCl}_3$ ): 0.1218.

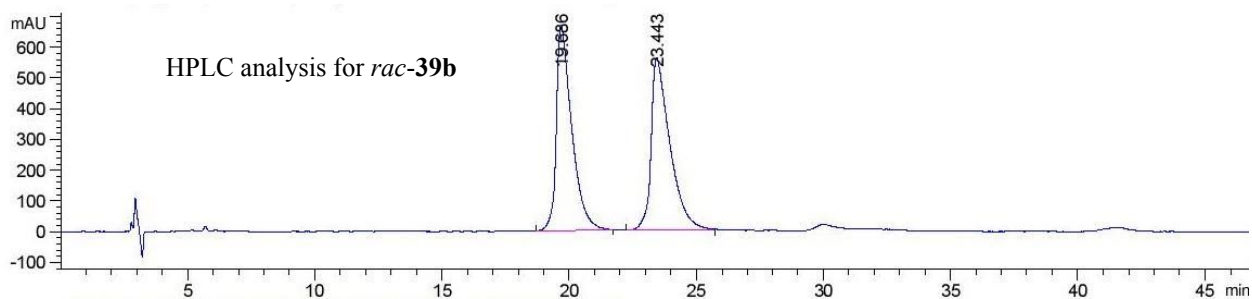

| Peak # | RetTime [min] | Type | Width [min] | Area [mAU*s] | Height [mAU] | Area %  |
|--------|---------------|------|-------------|--------------|--------------|---------|
| 1      | 19.686        | BV   | 0.5699      | 2.84904e4    | 670.26910    | 49.6251 |
| 2      | 23.443        | BV   | 0.6699      | 2.89209e4    | 560.55884    | 50.3749 |

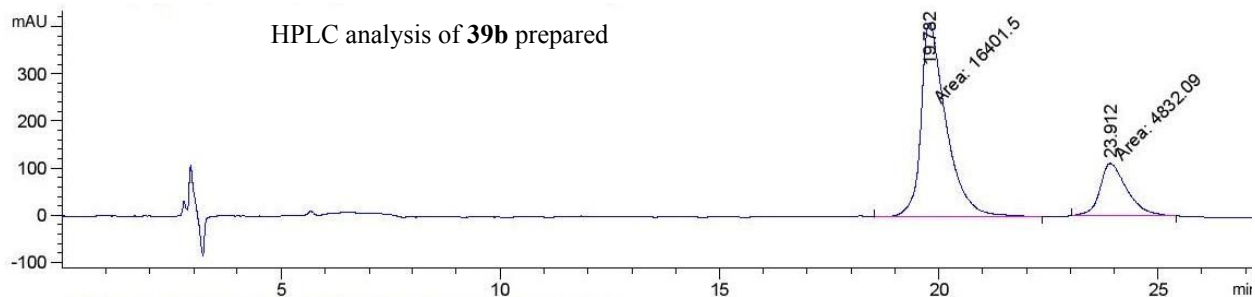

| Peak # | RetTime [min] | Type | Width [min] | Area [mAU*s] | Height [mAU] | Area %  |
|--------|---------------|------|-------------|--------------|--------------|---------|
| 1      | 19.782        | MM   | 0.6649      | 1.64015e4    | 411.10287    | 77.2432 |
| 2      | 23.912        | MM   | 0.7238      | 4832.08936   | 111.26319    | 22.7568 |

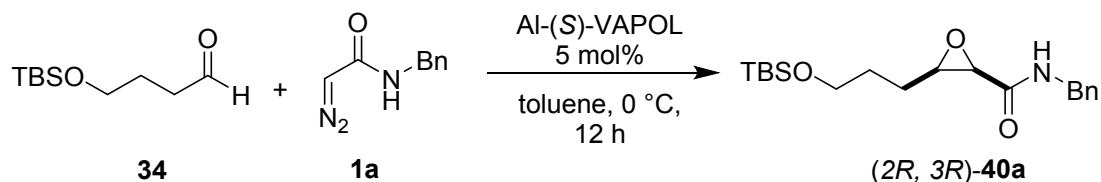

*(2R,3R)*-3-(2-((*tert*-butyldimethylsilyl)oxy)propyl)-*N*-benzyl-oxirane-2-carboxamide **40a**:

Epoxide **40a** was synthesized from 4-((*tert*-butyldimethylsilyl)oxy)butanal **34** (0.590 mmol, 135  $\mu$ L) and diazo compound **1b** (0.50 mmol, 88 mg) catalyzed by aluminum-(*S*)-VAPOL catalyst prepared with the general procedure with a 12 h reaction time. The crude product was purified via column chromatography (20 x 250 mm, 3:1 to 1:1 hexane: ethyl acetate as eluent) and epoxide **40a** was obtained as a yellowish oil in 84% isolated yield (0.420 mmol, 159 mg). The enantiomeric excess of epoxide **40a** was determined to be 50% with chiral HPLC (PIRKLE COVALENT (*R,R*))

WHELK-O 1 column, 90:10 hexane/2-propanol at 228 nm, flow-rate: 1 mL/min): retention times:  $R_t = 12.98$  min (minor enantiomer, ent-**40a**) and  $R_t = 15.55$  min (major enantiomer, **40a**).

Spectral data for epoxide **40a**:  $^1\text{H}$  NMR (500 MHz, Chloroform-*d*)  $\delta$  0.01 (s, 6H), 0.88 (s, 9H), 1.52 – 1.65 (m, 2H), 1.66 (tdd,  $J = 10.3, 6.0, 2.0$  Hz, 2H), 3.21 (td,  $J = 6.3, 4.8$  Hz, 1H), 3.52 – 3.66 (m, 3H), 4.45 (qd,  $J = 14.7, 6.0$  Hz, 2H), 6.48 (t,  $J = 6.2$  Hz, 1H), 7.23 – 7.37 (m, 5H).  $^{13}\text{C}\{^1\text{H}\}$  NMR (126 MHz, Chloroform-*d*)  $\delta$  -5.22, 18.41, 24.55, 26.04, 29.32, 43.09, 55.48, 58.68, 62.39, 127.86, 128.04, 128.90, 137.74, 167.38. IR: 3301brs, 2928w, 1660s, 1095s, 833s, 774s, 698w. HRMS (ESI-TOF)  $m/z$  350.2239, [(M+H<sup>+</sup>); calcd for C<sub>19</sub>H<sub>32</sub>NO<sub>3</sub>Si: 350.2151].

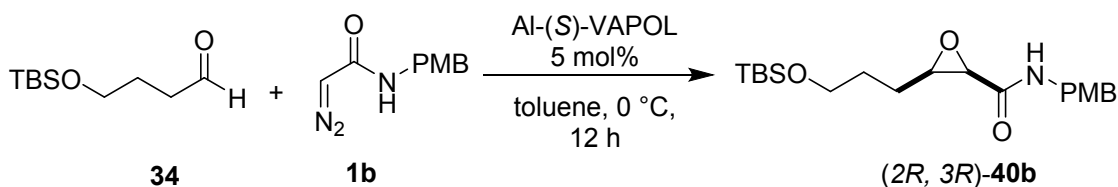

(2R,3R)-3-(2-((tert-butyldimethylsilyl)oxy)propyl)-N-(4-methoxybenzyl)-oxirane-2-carboxamide **40b**: Epoxide **40b** was synthesized from 4-((tert-butyldimethylsilyl)oxy)butanal **34** (0.599 mmol, 135  $\mu\text{L}$ ) and diazo compound **1b** (0.499 mmol, 103 mg) catalyzed by aluminum-(S)-VAPOL catalyst prepared with the general procedure with a 12 h reaction time. The crude product was purified via column chromatography (20 x 250 mm, 3:1 to 1:1 hexane: ethyl acetate as eluent) and epoxide **40b** was obtained as a yellowish oil in 67% isolated yield (0.335 mmol, 127 mg). The enantiomeric excess of epoxide **40b** was determined to be 51% with chiral HPLC (PIRKLE COVALENT (*R,R*) WHELK-O 1 column, 90:10 hexane/2-propanol at 228 nm, flow-rate: 1 mL/min): retention times:  $R_t = 30.97$  min (minor enantiomer, ent-**40b**) and  $R_t = 41.86$  min (major enantiomer, **40b**).

Spectral data for epoxide **40b**:  $^1\text{H}$  NMR (500 MHz, Chloroform-*d*)  $\delta$  0.01 (s, 6H), 0.87 (s, 9H), 1.50 – 1.62 (m, 2H), 1.59 – 1.70 (m, 2H), 3.20 (td,  $J = 6.3, 4.7$  Hz, 1H), 3.53 (d,  $J = 4.8$  Hz, 1H),

3.54 – 3.64 (m, 2H), 3.79 (s, 3H), 4.32 – 4.44 (m, 2H), 6.40 (t,  $J = 5.9$  Hz, 1H), 6.81 – 6.88 (m, 2H), 7.15 – 7.22 (m, 2H).  $^{13}\text{C}\{^1\text{H}\}$ NMR (126 MHz, Chloroform- $d$ )  $\delta$  -5.23, 18.40, 24.53, 26.03, 29.32, 42.53, 55.39, 55.46, 58.64, 62.40, 114.23, 129.39, 129.85, 159.26, 167.25. IR: 3309brs, 2928w, 1662s, 1512s, 1247s, 1095s, 1035w, 833s, 774s, 731w. HRMS (ESI-TOF)  $m/z$  380.2338,  $[(\text{M}+\text{H}^+)]$ ; calcd for  $\text{C}_{20}\text{H}_{34}\text{NO}_4\text{Si}$ : 380.2257]  $[\alpha]_D^{20}$  ( $c$  1.0,  $\text{CHCl}_3$ ): 0.054.

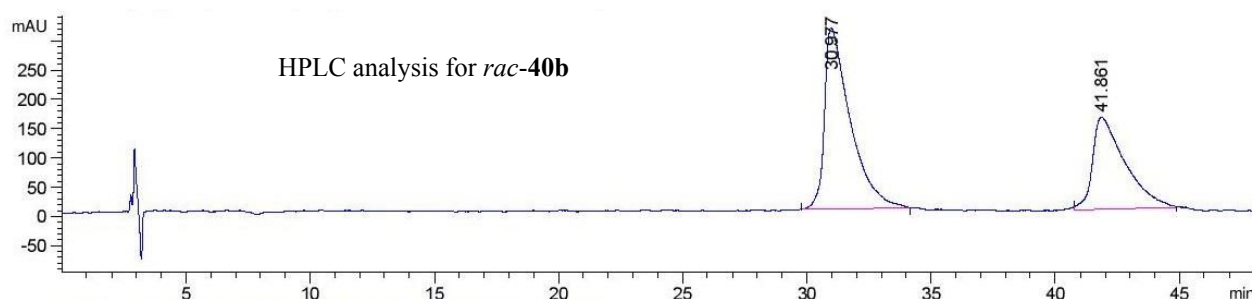

| Peak # | RetTime [min] | Type | Width [min] | Area [mAU*s] | Height [mAU] | Area %  |
|--------|---------------|------|-------------|--------------|--------------|---------|
| 1      | 30.985        | BB   | 0.9844      | 2.64967e4    | 365.23813    | 60.1958 |
| 2      | 41.866        | BB   | 1.2704      | 1.75208e4    | 181.46814    | 39.8042 |

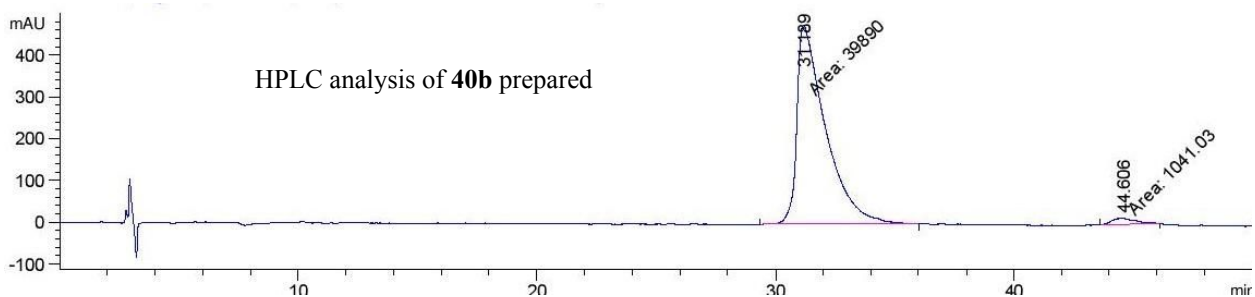

| Peak # | RetTime [min] | Type | Width [min] | Area [mAU*s] | Height [mAU] | Area %  |
|--------|---------------|------|-------------|--------------|--------------|---------|
| 1      | 31.189        | MM   | 1.3931      | 3.98900e4    | 477.21851    | 97.4566 |
| 2      | 44.606        | MM   | 1.1951      | 1041.03369   | 14.51785     | 2.5434  |

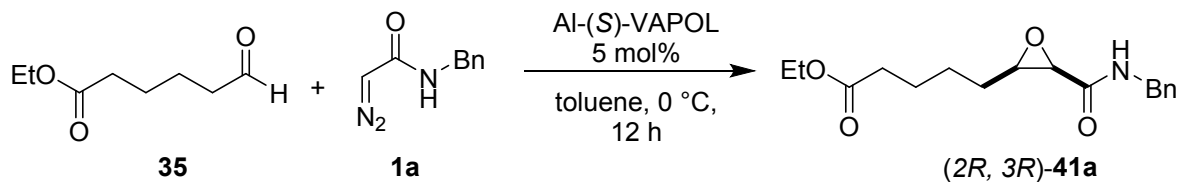

*Ethyl 5-((2S,3S)-3-(benzylcarbamoyl)oxiran-2-yl)pentanoate 41a*: Epoxide **41a** was synthesized from ethyl 6-oxohexanoate **35** (0.60 mmol, 95 mg) and diazo compound **1a** (0.50 mmol, 88 mg) catalyzed by 5 mol% aluminum-(*S*)-VAPOL catalyst prepared with the general procedure with a 12 h reaction time. The crude product was purified via column chromatography (20 x 250 mm, 3:1 to 1:1 hexane: ethyl acetate as eluent) and epoxide **41a** was obtained as a yellowish oil in 75% isolated yield (0.370 mmol, 113 mg). The enantiomeric excess of epoxide **41a** was determined to be 76% with chiral HPLC (PIRKLE COVALENT (*R,R*) WHELK-O 1 column, 85:15 hexane/2-propanol at 228 nm, flow-rate: 1 mL/min): retention times:  $R_t = 33.45$  min (minor enantiomer, ent-**41a**) and  $R_t = 39.6$  min (major enantiomer, **41a**).

Spectral data for epoxide **41a**:  $^1\text{H NMR}$  (500 MHz, Chloroform-*d*)  $\delta$  1.25 (t,  $J = 7.2$  Hz, 4H), 1.49 (qdt,  $J = 9.9, 7.5, 3.6$  Hz, 3H), 1.55 – 1.65 (m, 2H), 2.25 (t,  $J = 7.4$  Hz, 2H), 3.12 – 3.20 (m, 1H), 3.54 (d,  $J = 4.7$  Hz, 1H), 4.12 (q,  $J = 7.1$  Hz, 2H), 4.41 (dd,  $J = 14.6, 5.8$  Hz, 1H), 4.51 (dd,  $J = 14.6, 6.3$  Hz, 1H), 6.48 (t,  $J = 5.8$  Hz, 1H), 7.25 – 7.37 (m, 5H).  $^{13}\text{C}\{^1\text{H}\}$ NMR (126 MHz, Chloroform-*d*)  $\delta$  14.36, 24.63, 25.65, 27.51, 34.06, 43.07, 55.33, 58.46, 60.43, 127.87, 128.06, 128.91, 137.77, 167.28, 173.44. IR: 3325brs, 2930w, 1729s, 1662s, 1572s, 1162s, 699s. HRMS (ESI-TOF)  $m/z$  306.1732, [(M+H)<sup>+</sup>]; calcd for C<sub>17</sub>H<sub>24</sub>NO<sub>4</sub>: 306.1705] [ $\alpha$ ]<sup>20</sup><sub>D</sub> (*c* 1.0, CHCl<sub>3</sub>): 0.1193.



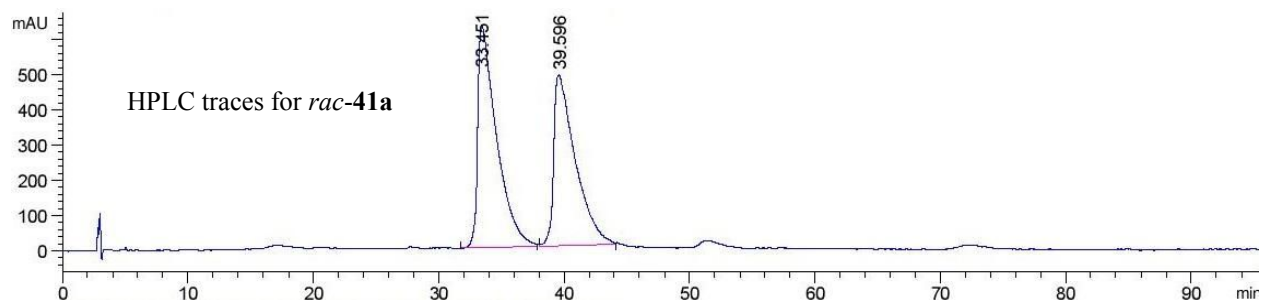

| Peak # | RetTime [min] | Type | Width [min] | Area [mAU*s] | Height [mAU] | Area %  |
|--------|---------------|------|-------------|--------------|--------------|---------|
| 1      | 33.451        | BV   | 1.2469      | 6.64301e4    | 633.74402    | 53.2155 |
| 2      | 39.596        | VV   | 1.4269      | 5.84022e4    | 485.67450    | 46.7845 |

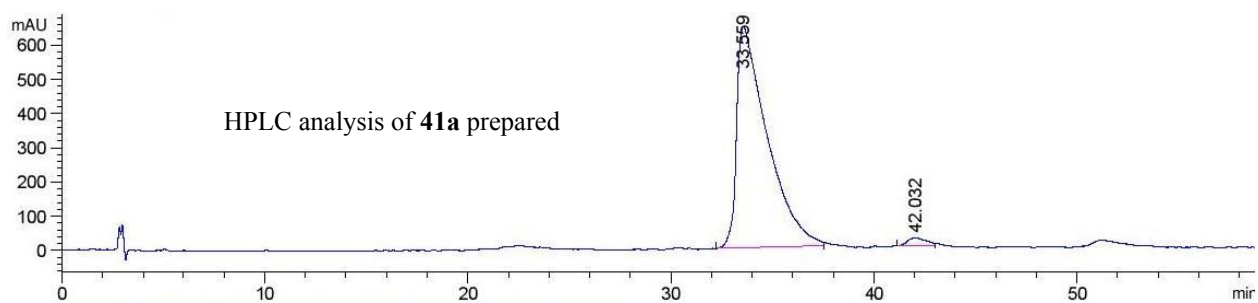

| Peak # | RetTime [min] | Type | Width [min] | Area [mAU*s] | Height [mAU] | Area %  |
|--------|---------------|------|-------------|--------------|--------------|---------|
| 1      | 33.559        | BV   | 1.3327      | 6.79210e4    | 647.01331    | 97.8536 |
| 2      | 42.032        | BV   | 0.7346      | 1489.84741   | 23.92212     | 2.1464  |

## 9. Deprotection of TBS-alcohol

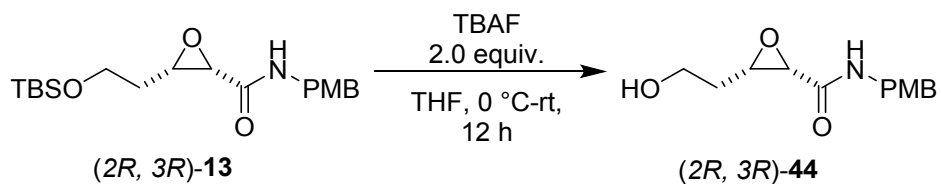

*(2R,3R)*-3-(2-hydroxyethyl)-*N*-(4-methoxybenzyl)oxirane-2-carboxamide **13**: To a solution of epoxide **13** (0.490 mmol, 183 mg) in 5 mL THF in a 25 mL round bottom flask at 0 °C was added tetrabutylammonium fluoride (1 mmol, 1M solution in THF, 1 mL) and the resulting solution was

stirred at room temperature for 12 h. After removing the solvent under reduced pressure the resulting crude mixture was purified via column chromatography (20 x 250 mm, 1:1 hexane: ethyl acetate, pure ethyl acetate and 19:1 ethyl acetate: methanol) and compound **44** was obtained as a white solid in 84% yield (0.420 mmol, 106 mg). mp: 75-76 °C.

Spectral data for compound **44**:  $^1\text{H}$  NMR (500 MHz, Chloroform-*d*)  $\delta$  1.70 – 1.82 (m, 2H), 3.34 (td,  $J = 6.4, 4.8$  Hz, 1H), 3.57 (d,  $J = 4.8$  Hz, 1H), 3.80 (s, 3H), 3.75 – 3.87 (m, 2H), 4.32 – 4.45 (m, 2H), 6.44 (s, 1H), 6.83 – 6.90 (m, 2H), 7.14 – 7.25 (m, 2H).  $^{13}\text{C}\{^1\text{H}\}$  NMR (126 MHz, Chloroform-*d*)  $\delta$  30.91, 42.67, 54.93, 55.45, 56.62, 59.86, 114.30, 129.48, 129.68, 159.35, 167.33. IR: 3259brs, 1646s, 1511s, 1249s, 1031s, 806s, 572m. HRMS (ESI-TOF)  $m/z$  274.1138,  $[(\text{M}+\text{Na}^+)]$ ; calcd for  $\text{C}_{13}\text{H}_{17}\text{NO}_4\text{Na}$ : 273.0977],  $[\alpha]^{20}_{\text{D}}$  ( $c$  1.0,  $\text{CHCl}_3$ ): 0.0161.

## 10. One pot alcohol tosylation and amide cyclization

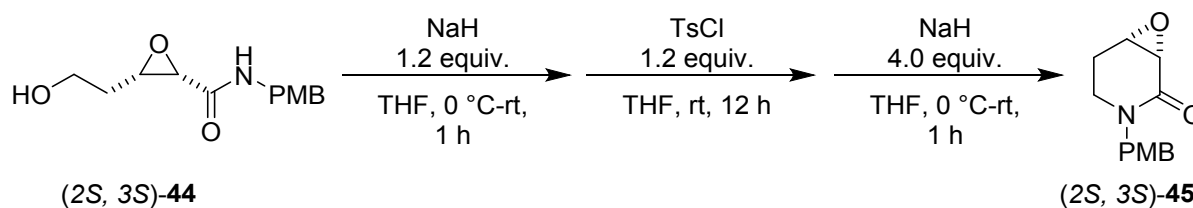

*(1S,6S)*-3-(4-methoxybenzyl)-7-oxa-3-azabicyclo[4.1.0]heptan-2-one **45**: A flamed dried 25 mL round bottom flask was charged with compound **44** (0.499 mmol, 126 mg), and 5 mL THF. Then the resulting solution was cooled down to 0 °C, followed by addition of NaH (0.5 mmol, 60% dispersed in mineral oil, 20 mg). The reaction was warmed up to room temperature and stirred for an additional 1 h. Next, the reaction vessel was cooled down to 0 °C and freshly purified 4-toluenesulfonyl chloride (0.590 mmol, 115 mg) was slowly added. The resulting solution was warmed up to room temperature and stirred for another hour. After cooling down the temperature of the reaction to 0 °C, NaH (2.0 mmol, 60% dispersed in mineral oil, 80 mg) was added slowly

followed by gradual warming up to room temperature and stirring at ambient temperature for 1 h. Then, the reaction was quenched with careful addition of saturated aq NH<sub>4</sub>Cl. The aqueous layer was separated and extracted three times with ethyl acetate. The combined organic layer was washed with brine, dried over Na<sub>2</sub>SO<sub>4</sub> and purified via column chromatography (20 x 250 mm, 2:1 to 0:1 hexane: ethyl acetate). Compound **45** was obtained as pure white solid in 67% yield (0.33 mmol, 78 mg). The structure of this compound was confirmed unequivocally with x-ray structural analysis (CCDC number: 1972358). mp: 67-68 °C. mp of crystal: 68-69 °C.

Spectral data for compound **45**: <sup>1</sup>H NMR (500 MHz, Chloroform-*d*) δ 1.90 (ddd, *J* = 14.4, 12.7, 6.1 Hz, 1H), 2.23 (dq, *J* = 14.6, 2.7, 2.2 Hz, 1H), 2.86 – 2.95 (m, 1H), 3.28 (td, *J* = 12.6, 4.3 Hz, 1H), 3.53 (d, *J* = 4.1 Hz, 1H), 3.58 (t, *J* = 3.4 Hz, 1H), 3.78 (d, *J* = 2.0 Hz, 3H), 4.38 (d, *J* = 14.6 Hz, 1H), 4.59 (d, *J* = 14.5 Hz, 1H), 6.81 – 6.87 (m, 2H), 7.11 – 7.18 (m, 2H). <sup>13</sup>C{<sup>1</sup>H}NMR (126 MHz, Chloroform-*d*) δ 24.22, 39.97, 49.91, 51.10, 53.17, 55.38, 114.16, 128.67, 129.39, 159.19, 166.79. IR: 1641s, 1512m, 1246s, 811m, 588m. HRMS (ESI-TOF) *m/z* 234.1153, [(M+H<sup>+</sup>); calcd for C<sub>13</sub>H<sub>16</sub>NO<sub>3</sub>: 234.1130], [α]<sup>20</sup><sub>D</sub> (*c* 1.0, CHCl<sub>3</sub>): 0.3521.

### 11. General method for the crystal growth of compound (2*S*, 3*S*)-**45**

The crystal of compound **II-186** was grown under following condition: 20 mg of compound **II-186** was dissolved in 5 mL of anhydrous diethylether in a 20 mL vial. Then the vial was covered with an aluminum foil which had holes in it. Slow evaporation of diethyl ether induced the subsequent crystal growth. CCDC number: 1972358.

### 12. PMB deprotection

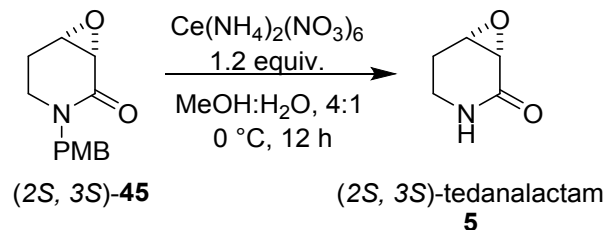

*(-)-tedanalactam 5*: To the stirring solution of compound **45** (0.490 mmol, 117 mg) in 12.5 mL methanol: water (4:1) at 0 °C was added  $\text{Ce}(\text{NH}_4)_2(\text{NO}_3)_6$  (0.590 mmol, 329 mg) and the resulting mixture was stirred at 0 °C for 12 hour. The reaction was quenched with the addition of saturated  $\text{NH}_4\text{Cl}$ . The aqueous layer was separated and extracted three times with ethyl acetate. The combined organic layer was washed with brine, dried over  $\text{Na}_2\text{SO}_4$  and purified via column chromatography (20 x 250 mm, 2:1 to 0:1 hexane: ethyl acetate then 19:1 ethyl acetate: methanol). Compound **5** was obtained as a yellow oil in 75% yield (0.375 mmol, 42.1 mg).

Spectral data for compound **5**:  $^1\text{H}$  NMR (500 MHz, Chloroform-*d*)  $\delta$  1.95 – 2.07 (m, 1H), 2.28 (dddd,  $J = 14.6, 4.3, 2.8, 1.2$  Hz, 1H), 3.03 (dtt,  $J = 12.3, 6.1, 1.4$  Hz, 1H), 3.27 – 3.46 (m, 2H), 3.58 – 3.63 (m, 1H), 6.66 (s, 1H).  $^{13}\text{C}\{^1\text{H}\}$  NMR (126 MHz, Chloroform-*d*)  $\delta$  23.64, 35.39, 50.78, 53.26, 169.28. HRMS (ESI-TOF)  $m/z$  114.0584, [(M+H)<sup>+</sup>]; calcd for  $\text{C}_5\text{H}_7\text{NO}_2$ : 114.0555],  $[\alpha]^{20}_{\text{D}}$  (0.1 M, MeOH): -7.1. Literature value:  $[\alpha]^{20}_{\text{D}}$  (0.1 M, MeOH): -7.9 These data matched with literature values.<sup>8,9</sup>

### 13. General procedure 2: mono-protection of diol:<sup>10</sup>

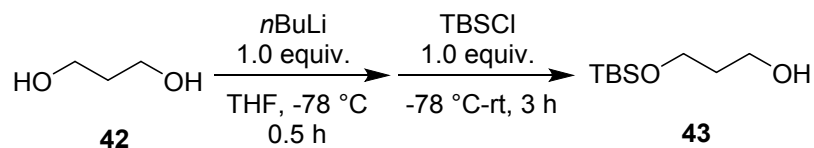

*3-((tert-butyl-dimethylsilyl)oxy)propan-1-ol 43*: To a stirring solution of 1,3-propan-diol **42** (42 mmol, 3.0 mL) in 80 mL of THF at -78 °C was added *n*-BuLi (42 mmol, 2.5 M in hexane, 17 mL) and the resulting solution was stirred at the same temperature for 30 minutes. Then a solution of *t*BuMe<sub>2</sub>SiCl (42.1 mmol, 6.33 g) in 10 mL THF was added to the stirring solution at -78 °C followed by warming up the reaction vessel to room temperature and stirring it at ambient temperature for 3 h. The reaction was quenched by slow addition of saturated NH<sub>4</sub>Cl. Then the aqueous layer was separated, extracted three times with diethyl ether. The combined organic layer was washed with brine and dried over Na<sub>2</sub>SO<sub>4</sub>. After removing the solvent under reduced pressure, the crude mixture was purified via column chromatography (20 x 250 mm, 5:1 to 2:1 hexane: ethyl acetate) and the desired product **43** was obtained as a colorless oil in 90% isolated yield (38 mmol, 7.2 g). <sup>1</sup>H NMR (500 MHz, Chloroform-*d*) δ -0.02 (s, 6H), 0.86 (s, 9H), 1.73 (p, *J* = 5.7 Hz, 2H), 3.73 (m, 2H) 3.75 (dt, *J* = 5.2 Hz, 2H). <sup>13</sup>C {<sup>1</sup>H}NMR (126 MHz, Chloroform-*d*) δ -5.51, 18.17, 25.86, 34.13, 62.47, 62.97. These data are in agreement with the literature values.<sup>10</sup>

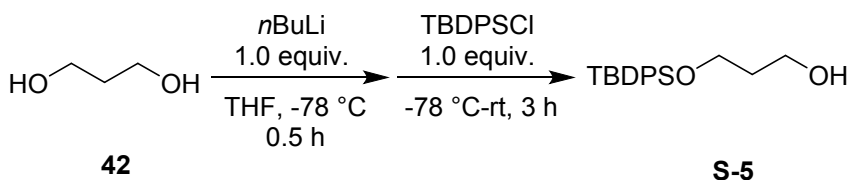

*3-((tert-butyl-diphenylsilyl)oxy)propan-1-ol S-5*: Compound **S-5** was synthesized from 1,3-propan-diol **42** (42 mmol, 3.1 mL) and *t*BuPh<sub>2</sub>SiCl (42.01 mmol, 11.54 g) with the general procedure 2. The resulting alcohol **S-5** was purified via column chromatography (20 x 250 mm, 5:1 to 2:1 hexane: ethyl acetate) and a white solid was afforded as the pure product in 87% yield (36.54 mmol, 11.49 g).

Spectral data for compound **S-5**:  $^1\text{H}$  NMR (500 MHz, Chloroform-*d*)  $\delta$  1.07 (s, 9H), 1.83 (p,  $J$  = 5.7 Hz, 2H), 2.42 (s, 1H), 3.86 (t,  $J$  = 5.6 Hz, 4H), 7.37 – 7.45 (m, 4H), 7.42 – 7.49 (m, 2H), 7.67 – 7.75 (m, 4H).  $^{13}\text{C}\{^1\text{H}\}$ NMR (126 MHz, Chloroform-*d*)  $\delta$  19.09, 26.83, 34.20, 62.06, 63.37, 127.77, 129.80, 133.20, 135.55. These data are in agreement with the literature values.<sup>11</sup>

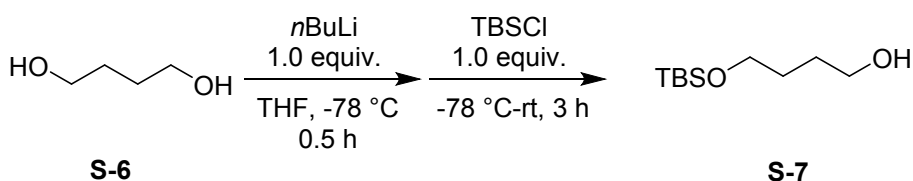

*4-((tert-butyldimethylsilyl)oxy)butan-1-ol S-7*: Compound **S-7** was synthesized from 1,3-butanediol (34 mmol, 3.0 mL) and *t*BuMe<sub>2</sub>SiCl (34 mmol, 5.1 g) with the general procedure 2. The resulting alcohol **S-7** was purified via column chromatography (20 x 250 mm, 5:1 to 2:1 hexane: ethyl acetate) and a colorless oil was afforded as the pure product in 76% yield (25.8 mmol, 5.28 g).

Spectral data for compound **S-7**:  $^1\text{H}$  NMR (500 MHz, Chloroform-*d*)  $\delta$  0.06 (s, 6H), 0.89 (s, 9H), 1.57 – 1.70 (m, 4H), 3.60 – 3.69 (m, 4H).  $^{13}\text{C}\{^1\text{H}\}$ NMR (126 MHz, Chloroform-*d*)  $\delta$  -5.42, 18.28, 25.88, 29.88, 30.24, 62.74, 63.34. These data are in agreement with the literature values.<sup>12</sup>

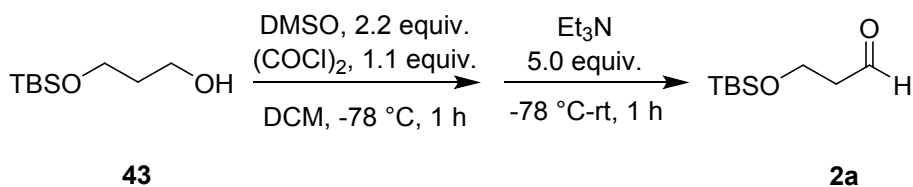

#### 14. General procedure 3: Swern oxidation:

*3-((tert-butyldimethylsilyl)oxy)propanal 2a*: In a flamed dried 500 mL round bottom flask under N<sub>2</sub>, DMSO (33 mmol, 2.3 mL) and CH<sub>2</sub>Cl<sub>2</sub> (100 mL) were added. Then the reaction vessel was

cooled down to  $-78\text{ }^{\circ}\text{C}$  and a solution of oxalyl chloride (16.5 mmol, 1.01 mL) in 10 mL  $\text{CH}_2\text{Cl}_2$  was slowly added. After 10 minutes, alcohol **43** (15 mmol, 2.8 g) as a solution in 7.5 mL of  $\text{CH}_2\text{Cl}_2$  was added slowly and the reaction mixture was stirred at  $-78\text{ }^{\circ}\text{C}$  for 1 h. The reaction mixture was warmed up to room temperature after the addition of  $\text{Et}_3\text{N}$  (75 mmol, 10 mL) and it was quenched by the addition of saturated  $\text{NH}_4\text{Cl}$ . The organic layer was separated and washed with saturated  $\text{CuSO}_4$  solution and brine. The resulting solution was dried over  $\text{Na}_2\text{SO}_4$  and the solvent was removed under reduced pressure. Simple distillation (b.p.  $65\text{ }^{\circ}\text{C}$ , 1 mmHg) afforded pure aldehyde **2a** as a colorless oil in quantitative yield (15 mmol, 2.8 g).

Spectral data for compound **2a**:  $^1\text{H}$  NMR (500 MHz, Chloroform-*d*)  $\delta$  0.06 (s, 6H), 0.86 (t,  $J = 1.2$  Hz, 9H), 2.57 (tdd,  $J = 6.0, 2.2, 0.9$  Hz, 2H), 3.97 (td,  $J = 6.0, 0.9$  Hz, 2H), 9.78 (td,  $J = 2.0, 0.8$  Hz, 1H).  $^{13}\text{C}\{^1\text{H}\}$  NMR (126 MHz, Chloroform-*d*)  $\delta$  -5.47, 18.19, 25.78, 46.53, 57.37, 202.01. These data are in good agreement with literature values.<sup>13</sup>

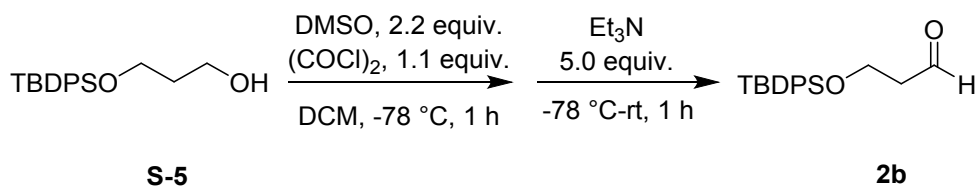

*3-((tert-butyldiphenylsilyloxy)propanal 2b*: Aldehyde **2b** was prepared from alcohol **S-5** (9.5 mmol, 3.1 g) with the general procedure 3 and purified via column chromatography (20 x 250 mm, 19:1 to 9:1 hexane: ethyl acetate) which afforded a white solid as the pure product in 78% yield (7.41 mmol, 2.32 g).

Spectral data for compound **2b**:  $^1\text{H}$  NMR (500 MHz, Chloroform-*d*)  $\delta$  1.04 (s, 9H), 2.61 (td,  $J = 6.0, 2.2$  Hz, 2H), 4.03 (t,  $J = 6.0$  Hz, 2H), 7.36 – 7.44 (m, 4H), 7.41 – 7.49 (m, 2H), 7.63 – 7.70 (m, 4H), 9.83 (t,  $J = 2.2$  Hz, 1H).  $^{13}\text{C}\{^1\text{H}\}$  NMR (126 MHz, Chloroform-*d*)  $\delta$  19.13, 26.74, 46.37,

58.27, 127.76, 129.81, 133.21, 135.53, 201.95. These data are in agreement with the literature values.<sup>14</sup>

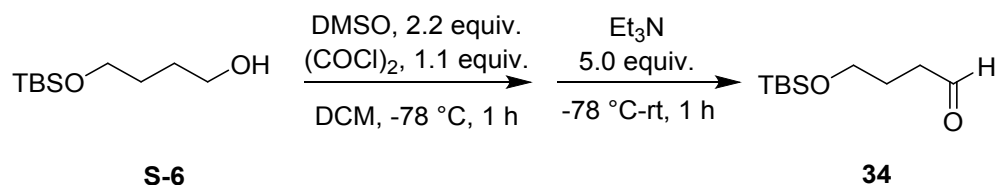

*4-((tert-butyldimethylsilyl)oxy)butanal 34*: Aldehyde **34** was prepared from alcohol **S-6** (14.7 mmol, 3.01 g) with the general procedure 3 and purified via column chromatography (20 x 250 mm, 19:1 to 9:1 hexane: ethyl acetate) which afforded a colorless oil as the pure product in quantitative yield (14.7 mmol, 2.97 g).

Spectral data for compound **34**: <sup>1</sup>H NMR (500 MHz, Chloroform-*d*) δ 0.03 (s, 6H), 0.89 (s, 9H), 1.86 (tt, *J* = 7.0, 6.0 Hz, 2H), 2.51 (td, *J* = 7.1, 1.7 Hz, 2H), 3.65 (t, *J* = 6.0 Hz, 2H), 9.79 (t, *J* = 1.7 Hz, 1H). These data are in agreement with the literature values.<sup>12</sup>

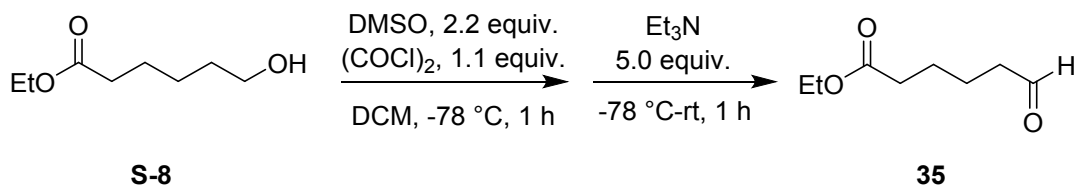

*ethyl 6-oxohexanoate 35*: Aldehyde **35** was prepared from ethyl 6-hydroxyhexanoate **S-8** (18 mmol, 3.0 mL) with the general procedure 3 and purified via simple distillation which afforded the pure product as a colorless oil in 80% yield (14.72 mmol, 2.328 g).

Spectral data for compound **35**: <sup>1</sup>H NMR (500 MHz, Chloroform-*d*) δ 1.21 (t, *J* = 7.1 Hz, 3H), 1.57 – 1.69 (m, 4H), 2.24 – 2.33 (m, 2H), 2.39 – 2.47 (m, 2H), 4.08 (q, *J* = 7.2 Hz, 2H), 9.73 (t, *J* = 1.6 Hz, 1H). <sup>13</sup>C{<sup>1</sup>H}NMR (126 MHz, Chloroform-*d*) δ 14.19, 21.44, 24.32, 33.92, 43.46, 60.29, 173.18, 202.06. These data are in agreement with the literature value.<sup>15</sup>



## 15. Preparation of diazo compound

All diazo compounds were synthesized via standard procedure developed in our lab and the spectral data of these compounds were in agreement with the reported data in the literature.<sup>7</sup>

Spectral data for 2-diazo-N-(4-methoxybenzyl)acetamide **1a**: <sup>1</sup>H NMR (500 MHz, Chloroform-d) δ 5.16 (s, 1H), 6.95 (t, J = 7.5 Hz, 1H), 7.19 (t, J = 8.0 Hz, 2H), 7.55 (d, J = 8.0 Hz, 2H), 8.98 (s, 1H). <sup>13</sup>C{<sup>1</sup>H}NMR (126 MHz, Chloroform-d) δ 13.69, 19.97, 32.03, 39.83, 46.92, 165.32.

Spectral data for 2-diazo-N-(4-methoxybenzyl)acetamide **1b**: <sup>1</sup>H NMR (500 MHz, Chloroform-d) δ 3.79 (s, 3H), 4.38 (d, J = 5.7 Hz, 2H), 4.72 (s, 1H), 5.44 (s, 1H), 6.79 – 6.89 (m, 2H), 7.16 – 7.23 (m, 2H). <sup>13</sup>C{<sup>1</sup>H}NMR (126 MHz, Chloroform-d) δ 43.68, 47.35, 55.45, 114.24, 129.29, 130.48, 159.22.

Spectral data for 2-diazo-N-(4-methoxybenzyl)acetamide **1c**: <sup>1</sup>H NMR (500 MHz, Chloroform-d) δ 0.89 (t, J = 7.3 Hz, 3H), 1.32 (dq, J = 14.7, 7.3 Hz, 2H), 1.46 (p, J = 7.3 Hz, 2H), 3.25 (brs, 2H), 4.73 (brs, 1H), 5.38 (brs, 1H); <sup>13</sup>C{<sup>1</sup>H}NMR (126 MHz, Chloroform-d) δ 13.69, 19.97, 32.03, 39.83, 46.92, 165.32.

## 16. Determining the absolute stereochemistry of epoxide **11** with host-guest system

In Borhan group, several studies have proved that epoxide oxygen and amide functionalities can have binding interaction with porphyrin tweezers.<sup>16</sup> Tweezer C5-Zn-TPFP was employed for determination of absolute stereochemistry of substrate **11** (Figure S1). A proposed binding model was proposed to predict the helicity of the tweezers and therefore, the ECCD signal. It was assumed

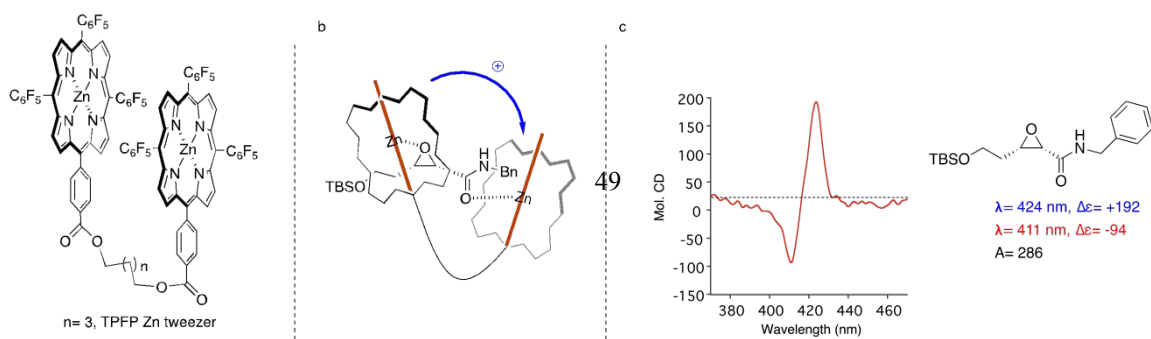

of the porphyrins binds to one of the pair electrons of epoxide from the same side of two hydrogens; therefore, the other porphyrin approaches to second binding site, carbonyl of amide, opposite side of the first porphyrin to avoid steric interaction (Figure S1-b). This binding approach between porphyrins and (*S,S*)-substrate **11** led to clockwise helical conformation and positive ECCD signal which is in agreement with the observed ECCD signals (Figure S1-c).

Figure S1: Structure of C5-Zn-TPFP. (b). binding model of substrate **11** and tweezer. (c). ECCD spectra.

### 16.1. Procedure for ECCD Measurement:

To hexanes (1 mL) in a 1.0 cm cell, 1  $\mu$ L of a 1 mM stock solution of zinc porphyrin tweezer (C5-Zn-TPFP-Tz) in anhydrous  $\text{CH}_2\text{Cl}_2$  was added to provide a 1  $\mu$ M tweezer solution. The background spectrum was recorded from 480 nm to 350 nm at a scan rate of 100 nm/min at room temperature. Chiral guest molecule **11** was dissolved in anhydrous  $\text{CH}_2\text{Cl}_2$  to afford a 10 mM solution then 0.2 to 100  $\mu$ L of this solution was added to the cell with the tweezer solution affording the host-guest complex. CD spectra of samples measured with 10 accumulations, was subtracted from background and normalized based on the concentration to obtain the molecular CD (Mol. CD).

## 17. Computational Methods

All density functional theory (DFT) calculations presented in the manuscript were performed using M06-2X<sup>18</sup>/6-311++G\*\*/PCM<sup>19</sup>//B3LYP<sup>20</sup>-D3<sup>21</sup>/6-31G\*<sup>22</sup> (solvent = toluene) level of theory as implemented in *Gaussian 16*.<sup>17</sup> Ground state geometry optimization and transition structures (TSs) were located at the B3LYP-D3/6-31G\* level of theory. All starting materials and intermediates were verified as true minima, and all the transition structures were characterized by one imaginary frequency. Single point energy calculations were performed using the M06-2X functional, a triple- $\zeta$  basis set 6-311++G\*\*, and a PCM solvent model for toluene. Gibbs free energies were estimated at reaction temperatures, namely 233 K and 273 K for the boron-catalyzed and aluminum-catalyzed epoxidation of aldehydes, respectively. The Gibbs free energies were further corrected using Grimme's quasi-RRHO<sup>23</sup> approach. Intermediates along the reaction coordinate were located by performing a quick reaction coordinate analysis (QRC) from the respective transition structures (**Figure 1** in the manuscript). Cartesian coordinates of all computed starting materials, intermediates, and transition structures are included in the attached xyz file.

Extensive conformational analysis was conducted on the appropriate transition states in evaluation of the stereoselectivity-determining step. The lowest energy conformations of these transition states in both the boron-catalyzed and aluminum-catalyzed operational BLA pathways were modeled using B3LYP-D3/6-31G\* and M06-2X/6-31G\* to ensure an unbiased interpretation of the free energy differences. Single point energy calculations were performed using M06-2X/6-311++G\*\* with a PCM solvent model for toluene. The relative energies between the modeled enantiomers remain almost consistent for each method employed.

For a systematic search on the enantiodivergent epoxidation of aldehydes, we utilized a reaction between **18** and **1a** (from the manuscript) as the model substrates. Various transition structures were explored for each of the different steps involved in the reaction pathway using B3LYP-D3/6-31G\* level of theory, as implemented in *Gaussian 16*. The array of structures arises from the possibilities of (1) different arrangements of the catalyst's phenyl rings, (2) variable hydrogen bonding interaction between the hydroxyl group of one ligand to the oxygen atom of another ligand of the catalyst, and 3) various arrangements of the phenyl ring of aldehyde (**18**) and diazoacetamide (**1a**) (Figure S2 and Figure S3). Overall, 141 unique transition structures and intermediates were identified for this reaction.

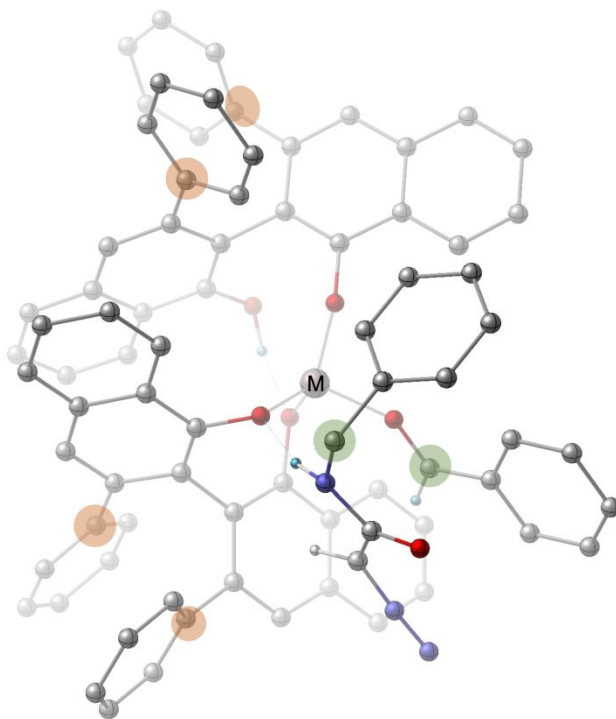

Figure S2: Showing rotatable bonds about which conformational search was performed for the BLA mechanism (M = B, Al).

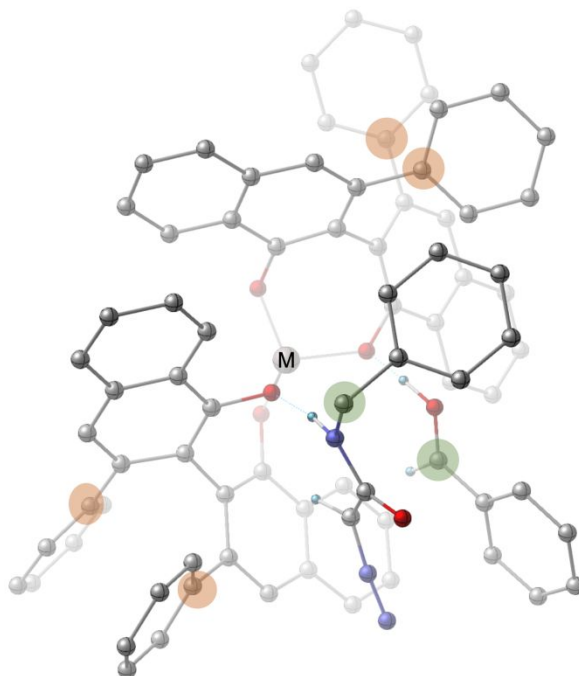

Figure S3: Showing rotatable bonds about which conformational search was performed for the BA mechanism (M = B, Al).

### 18. Brønsted Acid Assisted Lewis Acid Pathway for Boron

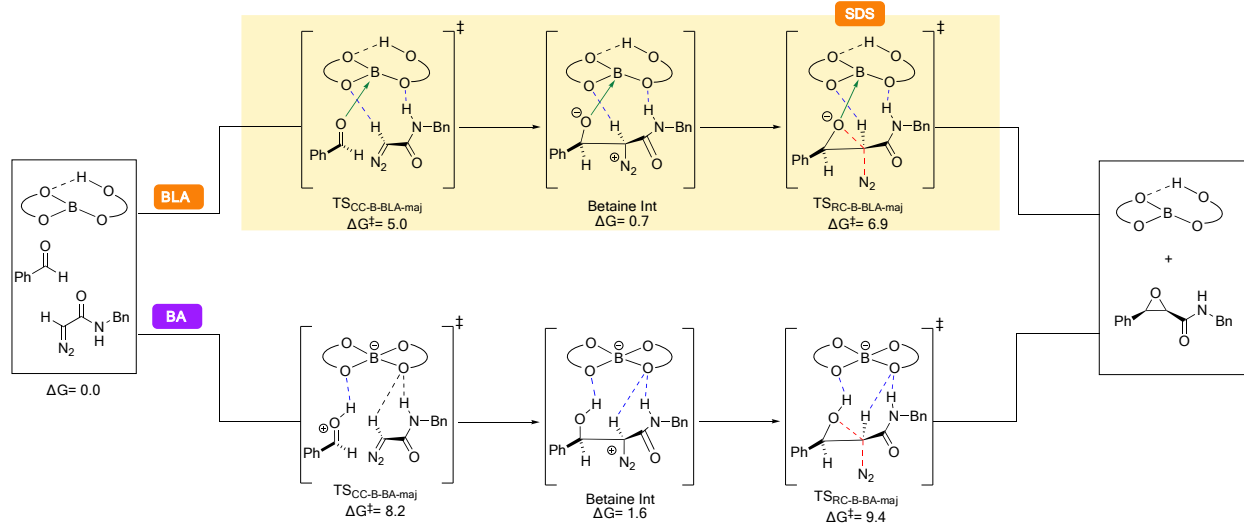

Figure S4: Free energies of key stationary points in the reaction coordinate leading to the major enantiomer of *cis*-epoxide **24a** for the reaction catalyzed by the (*R*)-VANOL boron catalyst computed at M06-2x/6-311++G\*\* PCM (toluene)// B3LYP-D3/6-31G\*. The BLA pathway is highlighted in yellow, and the selectivity-determining step (SDS) is indicated. All the reported energies for each transition state and intermediate are relative to the pre-reactive complex of the respective catalyst with benzaldehyde (**18**) and diazoacetamide **1a** in the BLA pathway, which is the lowest energy stationary point in either pathway for the catalyst.

To identify the rate- and selectivity-determining steps in the boron-catalyzed epoxidation of aldehydes, we modeled the key carbon-carbon bond forming and ring closing steps for the BLA pathway. The lowest-lying transition structures for the selectivity determining step of the BLA pathway are shown in **Figure 2** in the manuscript. The carbon-carbon bond forming distance is similar in the lowest-lying transition structures leading to major and minor enantiomers, specifically 1.85 Å in  $\text{TS}_{\text{CC-B-BLA-maj}}$  and 1.91 Å in  $\text{TS}_{\text{CC-B-BLA-min}}$ . Both the TSs benefit from similar interactions: (a) a strong intramolecular hydrogen bonding interaction present between the hydroxyl group and oxygen atom of another ligand of the catalyst; (b) an intermolecular hydrogen bonding interaction present between the NH of diazo and the oxygen atom of the catalyst and (c)

a weaker non-covalent interaction present between the  $\alpha$ -CH of diazo and the oxygen atom of the catalyst – shown in Figure S5.

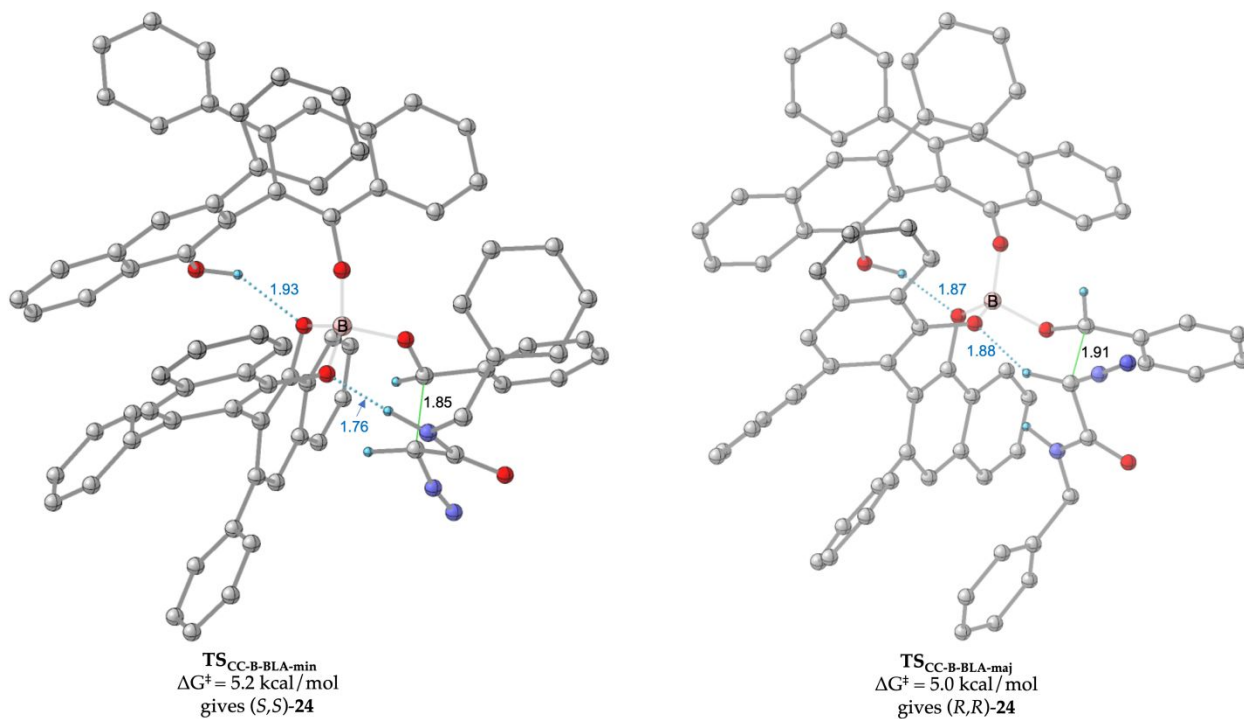

Figure S5: Lowest-lying transition structure for carbon-carbon bond formation (TS<sub>CC-B-BLA</sub>) for BLA pathway for (*R*)-VANOL boron catalyst.

## 19. Brønsted Acid Pathway for Boron

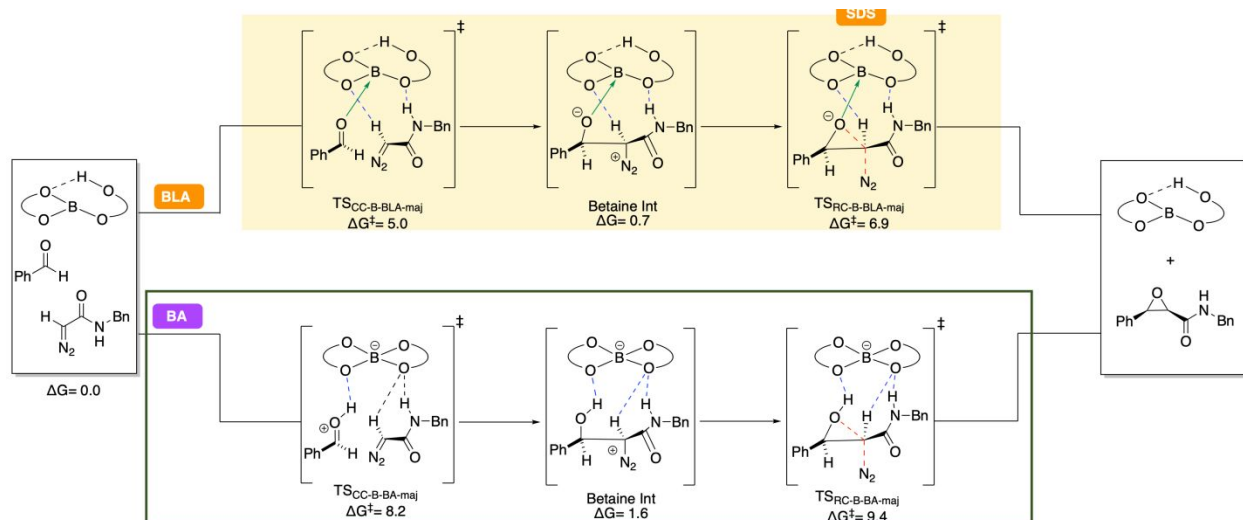

Figure S6: Free energies of key stationary points in the reaction coordinate leading to the major enantiomer of *cis*-epoxide **24a** for the reaction catalyzed by the (*R*)-VANOL boron catalyst computed at M06-2x/6-311++G\*\* PCM (toluene)// B3LYP-D3/6-31G\*. The BA pathway is highlighted in the green box, and the selectivity-determining step (SDS) is indicated. All the reported energies for each transition state and intermediate are relative to the pre-reactive complex of the respective catalyst with benzaldehyde (**18**) and diazoacetamide **1a** in the BLA pathway, which is the lowest energy stationary point in either pathway for the catalyst.

We initiated our DFT investigations by locating the transition structures for the key carbon-carbon bond-making ( $\text{TS}_{\text{CC}}$ ) and ring-closing step ( $\text{TS}_{\text{RC}}$ ) for the nucleophilic attack of **1a** to **18** for BLA, BA, and LA pathways. After careful analysis, BLA was found to be the operational pathway in the epoxidation reaction of the aldehydes, as described in the manuscript. The Brønsted acid (BA) pathway for the epoxidation of aldehydes was also explored (Figure S6-BA). It was expected that the catalyst structure would be comprised of a tetracoordinated boron along with protonated aldehyde coordinated to the oxygen atom of one ligand (**Scheme 4 in the manuscript**). A similar mechanism to BLA was proposed for this pathway, involving initiation via the nucleophilic attack of the diazo acetamide to the aldehyde, followed by an  $\text{S}_{\text{N}}2$ -like ring closure.



Key transition structures  $\text{TS}_{\text{CC}}$  and  $\text{TS}_{\text{RC}}$  were modeled for the major and minor enantiomers of the *cis*-epoxide. The extent of the carbon-carbon bond forming distance was indistinguishable in both the modeled transition structures for the key carbon-carbon bond-making step (1.97 Å in  $\text{TS}_{\text{CC-B-BA-maj}}$  and 2.01 Å in  $\text{TS}_{\text{CC-B-BA-min}}$ ). A strong intermolecular hydrogen bonding interaction between NH and the oxygen atom of the catalyst (1.87 Å in  $\text{TS}_{\text{CC-B-BA-maj}}$  and 1.89 Å in  $\text{TS}_{\text{CC-B-BA-min}}$ ) and a non-covalent interaction present between  $\alpha$ -CH and the oxygen atom the catalyst (2.22 Å in  $\text{TS}_{\text{CC-B-BA-maj}}$  and 2.36 Å in  $\text{TS}_{\text{CC-B-BA-min}}$ ) were observed in both the TSs (Figure S7). The lowest-lying TSs for the successive ring-closing step ( $\text{TS}_{\text{RC-B-BA-maj}}$  and  $\text{TS}_{\text{RC-B-BA-min}}$ ) retained similar interactions as their corresponding carbon-carbon bond-forming TSs (Figure S8). The C-O bond-forming distance (2.08 Å in  $\text{TS}_{\text{RC-B-BA-maj}}$  and 2.11 Å in  $\text{TS}_{\text{RC-B-BA-min}}$ ) and C-N bond-breaking distance (1.82 Å in  $\text{TS}_{\text{RC-B-BA-maj}}$  and 1.84 Å in  $\text{TS}_{\text{RC-B-BA-min}}$ ) were comparable in both the TSs. Given that the free energy barriers for the key TSs in the formation of the major enantiomer ( $\text{TS}_{\text{CC-B-BA-maj}}$  and  $\text{TS}_{\text{RC-B-BA-min}}$ ) were found to be significantly higher in energy compared to the lowest-lying TSs for the BLA pathway, this pathway was eliminated (Figure S6).

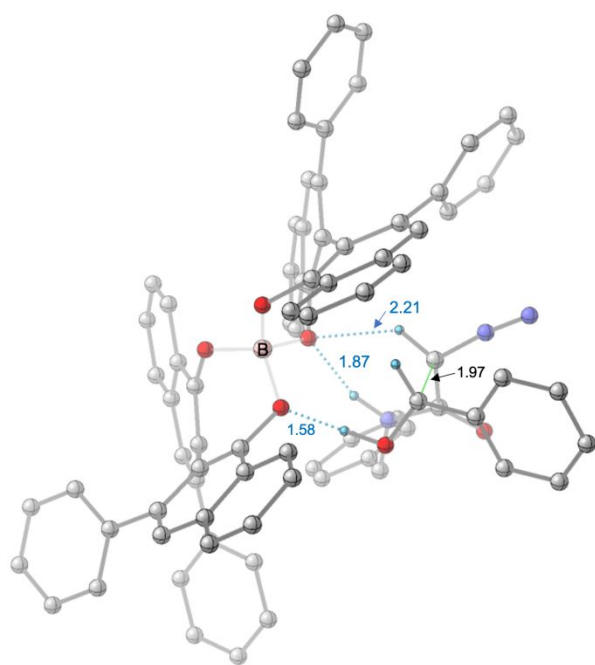

**TS<sub>CC-B-BA-min</sub>**  
 $\Delta G^\ddagger = 7.2$  kcal/mol  
 gives (*S,S*)-24

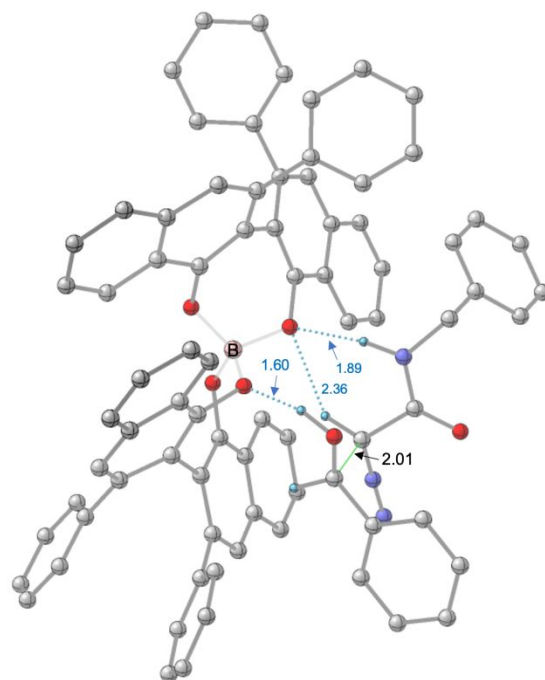

**TS<sub>CC-B-BA-maj</sub>**  
 $\Delta G^\ddagger = 8.2$  kcal/mol  
 gives (*R,R*)-24

Figure S7: Lowest-lying transition structure for carbon-carbon bond formation (TS<sub>CC-B-BA</sub>) for BA pathway for (*R*)-VANOL boron catalyst.

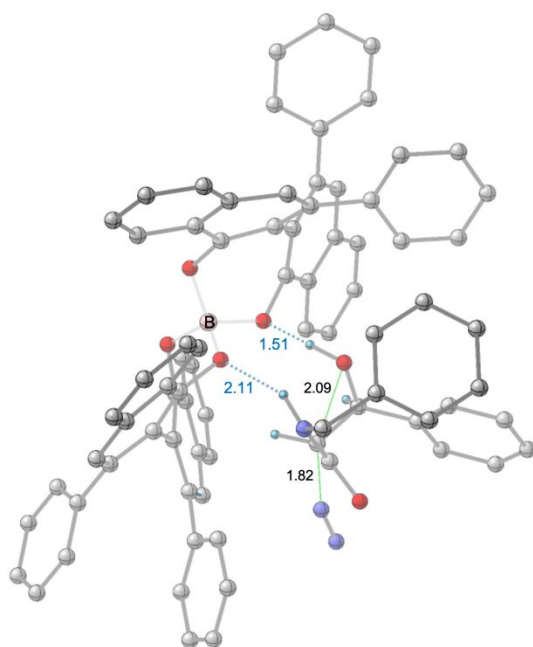

**TS<sub>RC-B-BA-min</sub>**  
 $\Delta G^\ddagger = 9.2$  kcal/mol  
 gives (*S,S*)-24

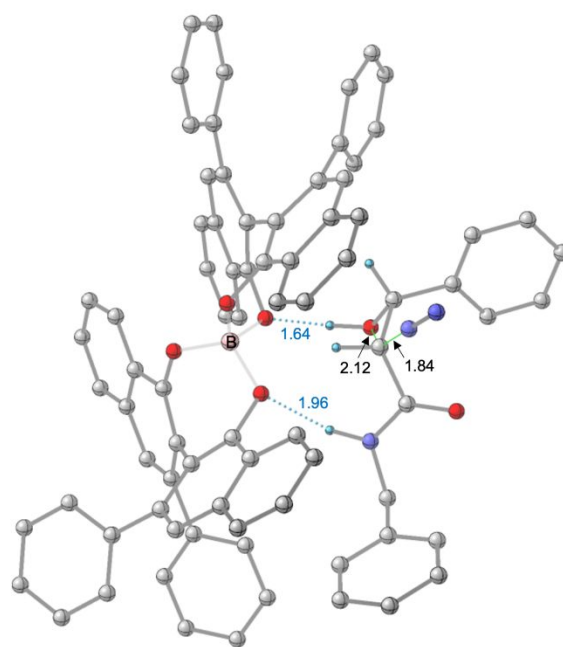

**TS<sub>RC-B-BA-maj</sub>**  
 $\Delta G^\ddagger = 9.4$  kcal/mol  
 gives (*R,R*)-24

Figure S8: Lowest-lying transition structure for ring-closing step ( $\text{TS}_{\text{RC-B-BA}}$ ) for BA pathway for (*R*)-VANOL boron catalyst.

## 20. Brønsted Acid Assisted Lewis Acid Pathway for Aluminum

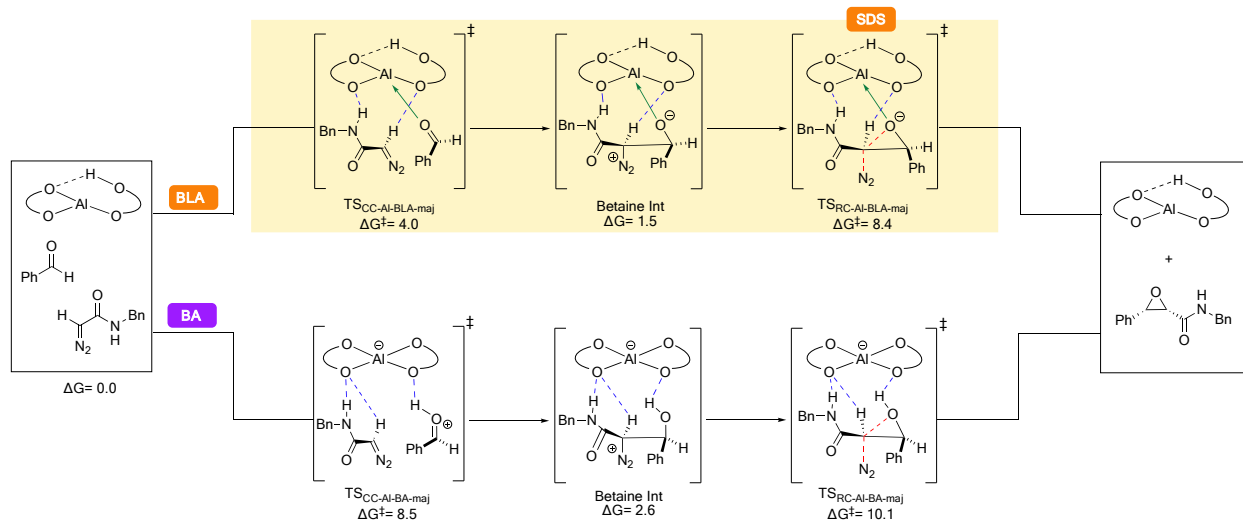

Figure S9: Free energies of key stationary points in the reaction coordinate leading to the major enantiomer of *cis*-epoxide **24a** for the reaction catalyzed by the (*R*)-VANOL aluminium catalyst computed at M06-2x/6-311++G\*\* PCM (toluene)// B3LYP-D3/6-31G\*. The BLA pathway is highlighted in yellow, and the selectivity-determining step (SDS) is indicated. All the reported energies for each transition state and intermediate are relative to the pre-reactive complex of the respective catalyst with benzaldehyde (**18**) and diazoacetamide **1a** in the BLA pathway, which is the lowest energy stationary point in either pathway for the catalyst.

To identify the rate- and selectivity-determining steps in the aluminum-catalyzed epoxidation of aldehydes, we modeled the key carbon-carbon bond forming and ring-closing steps for the BLA pathway. The lowest-lying transition structures for the selectivity determining step of the BLA pathway are shown in (**Figure 3 in the manuscript**). The carbon-carbon bond forming distance was found to be almost similar in the lowest-lying transition structures leading to the major and minor enantiomers, specifically 1.89 Å in  $\text{TS}_{\text{CC-Al-BLA-maj}}$  and 1.87 Å in  $\text{TS}_{\text{CC-Al-BLA-min}}$ .

Both the TSs benefit from similar interactions: (a) a strong intramolecular hydrogen bonding interaction present between the hydroxyl group and oxygen atom of another ligand of the catalyst; (b) an intermolecular hydrogen bonding interaction present between the NH of diazo and the oxygen atom of the catalyst and (c) a weaker non-covalent interaction present between the  $\alpha$ -CH of diazo and the oxygen atom of the catalyst – shown in Figure S10.

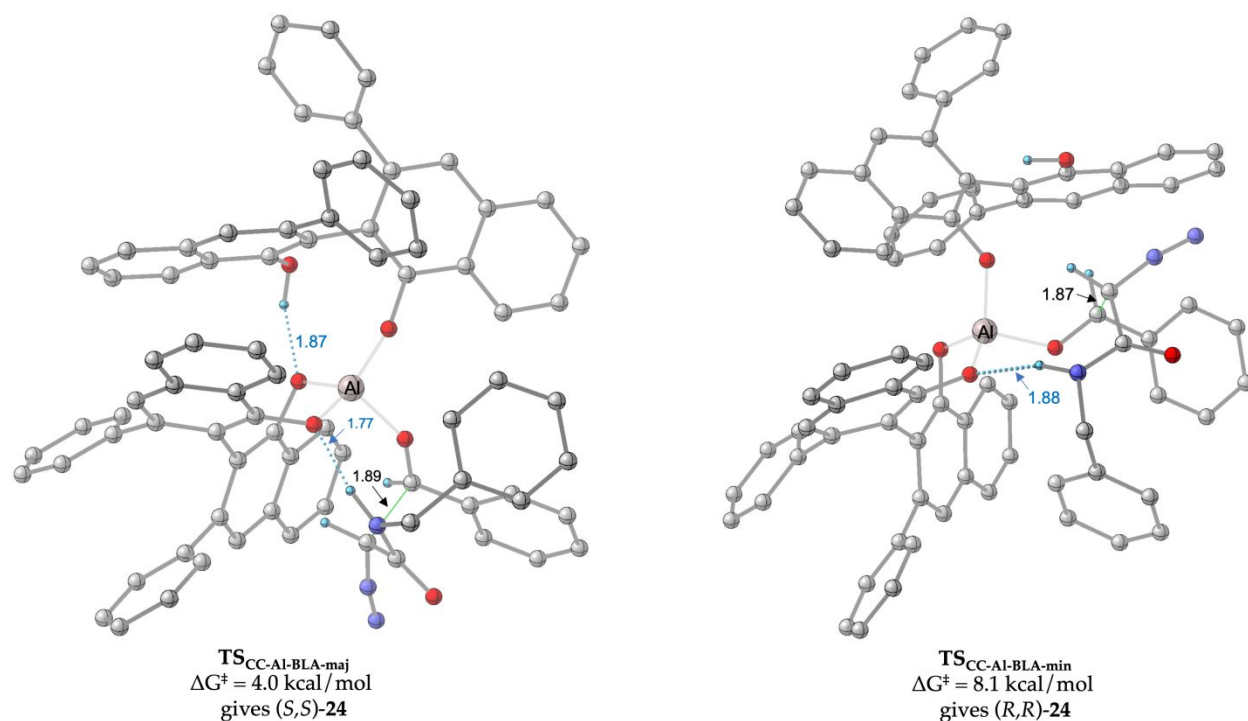

Figure S10: Lowest-lying transition structure for carbon-carbon bond formation (TS<sub>CC-Al-BLA</sub>) for BLA pathway for (*R*)-VANOL aluminum catalyst.

## 21. Brønsted Acid Pathway for Aluminum

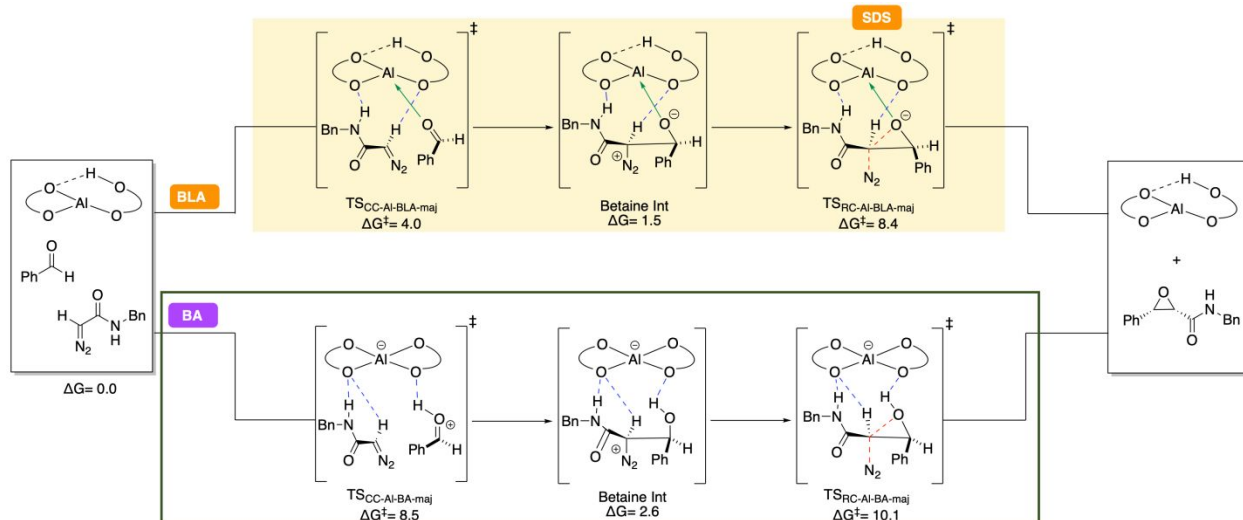

Figure S11: Free energies of key stationary points in the reaction coordinate leading to the major enantiomer of *cis*-epoxide **24a** for the reaction catalyzed by the (*R*)-VANOL aluminum catalyst computed at M06-2x/6-311++G\*\* PCM (toluene)// B3LYP-D3/6-31G\*. The BA pathway is highlighted in the green box, and the selectivity-determining step (SDS) is indicated. All the reported energies for each transition state and intermediate are relative to the pre-reactive complex of the respective catalyst with benzaldehyde (**18**) and diazoacetamide **1a** in the BLA pathway, which is the lowest energy stationary point in either pathway for the catalyst.

We initiated our DFT investigations by locating the transition structures for the key carbon-carbon bond-making ( $\text{TS}_{\text{CC}}$ ) and ring-closing step ( $\text{TS}_{\text{RC}}$ ) for the nucleophilic attack of **1a** to **18** for BLA, BA, and LA pathways. After careful analysis, BLA was found to be the operational pathway in the epoxidation reaction of the aldehydes, as described in the manuscript. The Brønsted acid (BA) pathway for the epoxidation of aldehydes was also explored. It was expected that the structure would be comprised of a tetracoordinated aluminium along with a protonated aldehyde coordinated to the oxygen atom of one ligand (Scheme 4 in the manuscript). A similar

mechanism to BLA was proposed for this pathway, involving initiation via the nucleophilic attack of the diazo acetamide to the aldehyde, followed by an  $S_N2$ -like ring closure (Figure S11-BA).

Key transition structures  $TS_{CC}$  and  $TS_{RC}$  were modeled for the major and minor enantiomers of the *cis*-epoxide. The extent of the carbon-carbon bond forming distance in  $TS_{CC-Al-BA-maj}$  is 2.03 Å whereas 1.96 in  $TS_{CC-Al-BA-min}$ . A strong intermolecular hydrogen bonding interaction between NH and the oxygen atom of the catalyst (1.81 Å in  $TS_{CC-Al-BA-maj}$  and 1.82 Å in  $TS_{CC-Al-BA-min}$ ) and a weak non-covalent interaction present between  $\alpha$ -CH and the oxygen atom of the catalyst (2.44 Å in  $TS_{CC-Al-BA-maj}$  and 2.38 Å in  $TS_{CC-Al-BA-min}$ ) were observed in both TSs. The lowest-lying TSs for the successive ring-closing step ( $TS_{RC-Al-BA-maj}$  and  $TS_{RC-Al-BA-min}$ ) retained similar interactions as their corresponding carbon-carbon bond-forming TSs (Figure S12). The C-O bond-forming distance (2.10 Å in  $TS_{RC-Al-BA-maj}$  and 2.11 Å in  $TS_{RC-Al-BA-min}$ ) and C-N bond-breaking distance (1.86 Å in  $TS_{RC-Al-BA-maj}$  and 1.83 Å in  $TS_{RC-Al-BA-min}$ ) were comparable in both the TSs (Figure S13). Given that the free energy barriers for the key TSs in the formation of the major enantiomer ( $TS_{CC-Al-BA-maj}$  and  $TS_{RC-Al-BA-min}$ ) were found to be significantly higher in energy compared to the lowest-lying TSs for the BLA pathway, this pathway was eliminated.

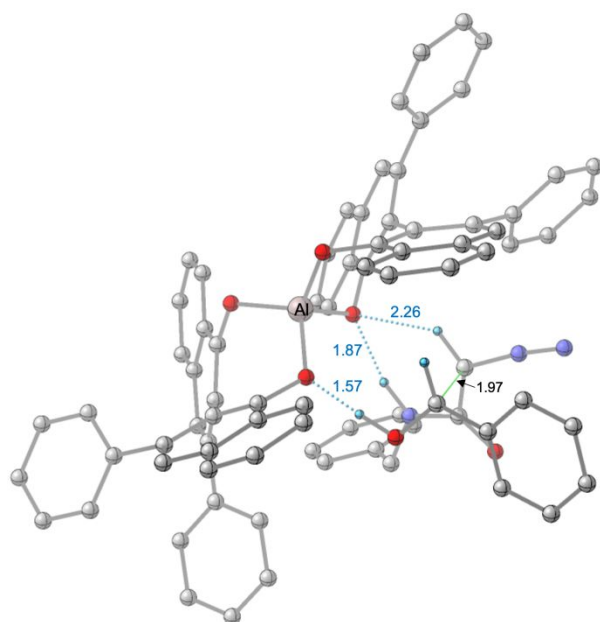

**TS<sub>CC-Al-BA-maj</sub>**  
 $\Delta G^\ddagger = 8.5$  kcal/mol  
 gives (S,S)-24

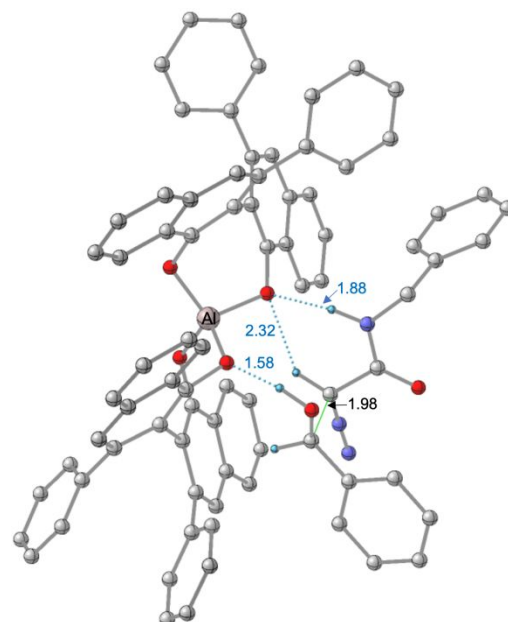

**TS<sub>CC-Al-BA-min</sub>**  
 $\Delta G^\ddagger = 8.9$  kcal/mol  
 gives (R,R)-24

Figure S12: Lowest-lying transition structure for carbon-carbon bond formation (TS<sub>CC-Al-BA</sub>) for BA pathway for (*R*)-VANOL aluminum catalyst.

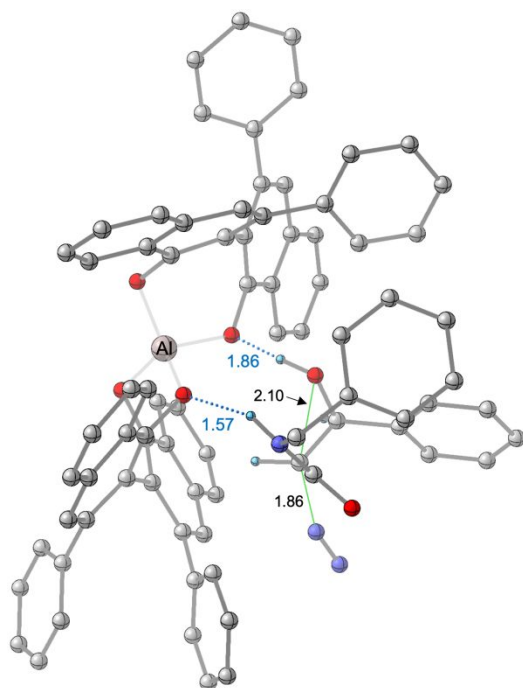

**TS<sub>RC-Al-BA-maj</sub>**  
 $\Delta G^\ddagger = 10.1$  kcal/mol  
 gives (S,S)-24

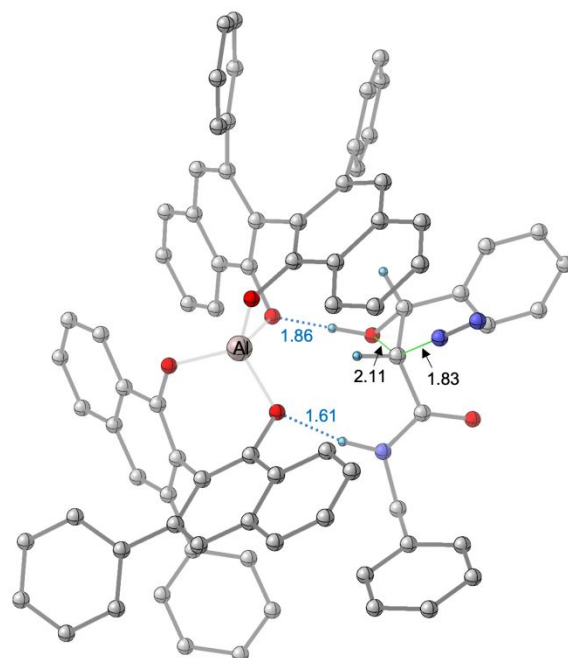

**TS<sub>RC-Al-BA-min</sub>**  
 $\Delta G^\ddagger = 10.9$  kcal/mol  
 gives (R,R)-24

Figure S13: Lowest-lying transition structure for ring-closing step ( $TS_{RC-Al-BA}$ ) for BA pathway for (*R*)-VANOL aluminum catalyst.

## 22. Alternate Structure of VANOL-derived Boron Catalyst

An alternate conformation of the VANOL-derived boron catalyst was also explored. The proposed structure of the catalyst contains two tri-coordinated borons (VANOL-B-2). It is anticipated that the hydrogen-bearing oxygen atom in VANOL-B protonates the diazo acetamide in the reaction and further coordinates with another boron-ligated VANOL moiety to generate the catalyst with a 3:2 ratio of VANOL to boron (Figure S14).

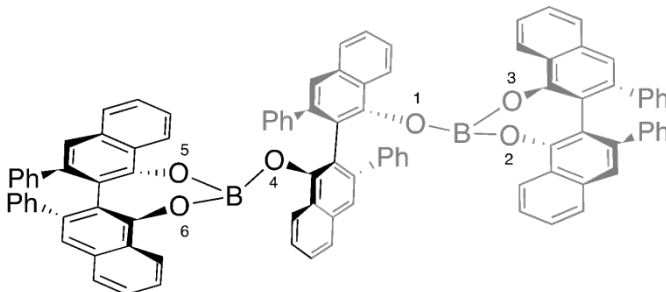

Figure S14: Proposed structure of 3:2 complex of VANOL-B-2 catalyst.

We modeled the carbon-carbon bond forming and ring-closing steps for the major enantiomer utilizing the VANOL-B-2 catalyst to establish the rate- and selectivity-determining steps. All the transition structures presented in this section for the (*R*)-VANOL-B-2 catalyzed reaction of **18** and **1a** were calculated using ONIOM(B3LYP/6-31+G\*:AM1), as implemented in *Gaussian 16*. High-level single-point energy calculations were performed using M06-2X/6-



311++G\*\* PCM (toluene). The division of layers for the ONIOM calculations is shown in Figure S15.

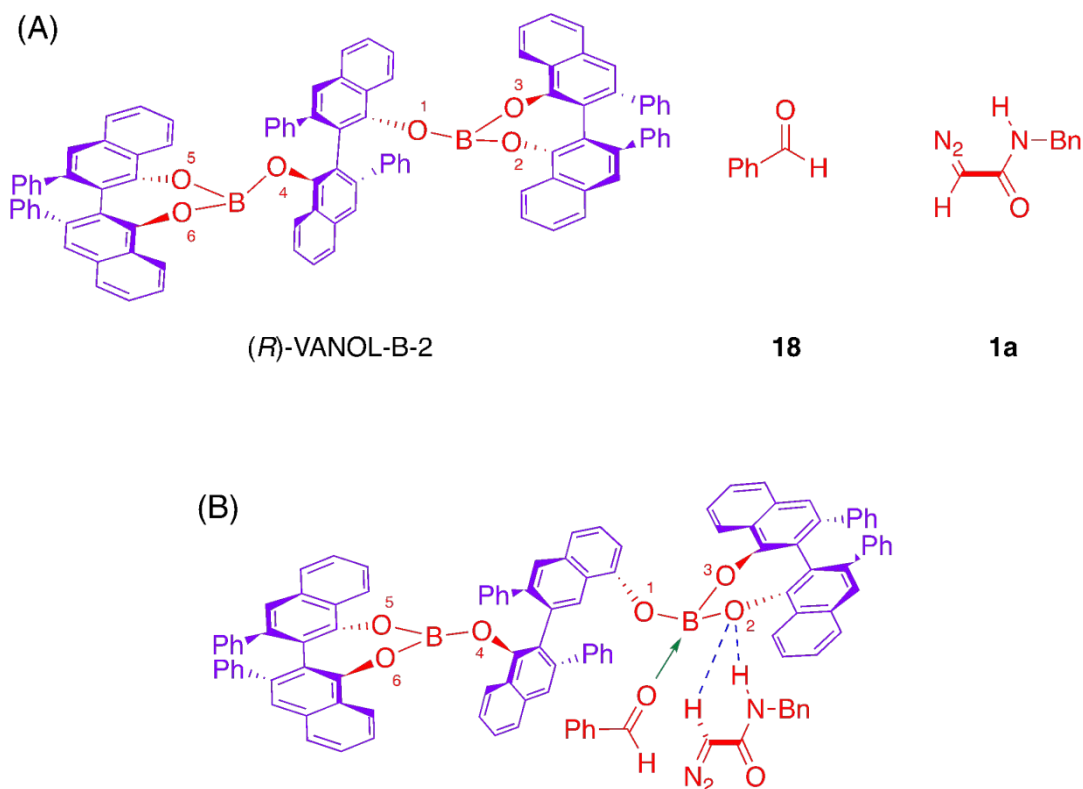

Figure S15: (A) Division of layers for ONIOM calculation. The portions highlighted in red are modeled using DFT calculation and portions highlighted in blue are calculated using the semi-empirical method (B) Interaction of VANOL-B-2 with aldehyde **18** and diazo acetamide **1a** in transition structure.

$\text{TS}_{\text{CC-B-2-maj}}$  and  $\text{TS}_{\text{RC-B-2-maj}}$  are the lowest energy transition structures located for the major enantiomer for the carbon-carbon bond forming and ring-closing steps, respectively. Both the TSs experience similar interactions with the VANOL-B-2 catalyst. A hydrogen bonding interaction between NH of **1a** and O2 of the catalyst (2.01 Å in  $\text{TS}_{\text{CC-B-2-maj}}$  and 2.05 Å in  $\text{TS}_{\text{RC-}}$

**B-2-maj**), an  $\alpha$ -CH of **1a** and O3 (2.19 Å in **TS<sub>CC-B-2-maj</sub>** and 2.23 Å in **TS<sub>RC-B-2-maj</sub>**), and an additional non-covalent interaction between the  $\alpha$ -CH of **18** and O3 (2.45 Å in **TS<sub>CC-B-2-maj</sub>** and 2.57 Å in **TS<sub>RC-B-2-maj</sub>**) are present, and more enhanced, in **TS<sub>CC-B-2-maj</sub>** compared to **TS<sub>RC-B-2-maj</sub>**. This facilitates the stabilization and lowering of the barrier for catalysis for the respective transition structure. **TS<sub>RC-B-2-maj</sub>** is found to be 7.0 kcal/mol higher in energy than **TS<sub>CC-B-2-maj</sub>** and serves as the rate- and selectivity-determining step (Figure S16). Having established the selectivity-determining step, we modeled both the observed *cis*-epoxides for the ring-closing step (Figure S17). The extent of C-O bond formation (2.15 Å in **TS<sub>RC-B-2-min</sub>** and 2.09 Å in **TS<sub>RC-B-2-maj</sub>**) and C-N bond breaking (1.86 Å in **TS<sub>RC-B-2-min</sub>** and 1.82 Å in **TS<sub>RC-B-2-maj</sub>**) are almost indistinguishable. There is a similar degree of hydrogen bonding present between NH of **1a** and O2 (1.93 Å in **TS<sub>RC-B-2-min</sub>** and 2.04 Å in **TS<sub>RC-B-2-maj</sub>**) in both the lowest lying transition structures located for the *cis*-epoxides. A stronger non-covalent interaction between  $\alpha$ -CH of **1a** and O2 (2.23 Å) was observed in **TS<sub>RC-B-2-maj</sub>** compared to **TS<sub>RC-B-2-min</sub>** (2.48 Å). The computed free energy difference between the two competing *cis* enantiomers was found to be 1.0 kcal/mol, favoring **TS<sub>RC-B-2-maj</sub>** leading to the experimentally observed enantiomer. A 79% ee at 233 K was predicted for these transition states, which is slightly lower than the experimentally observed ee of 99% for this reaction. Previously reported experimental studies on the Lewis acid boron complex does not support the formation of this catalyst conformation in the reaction.<sup>7</sup>

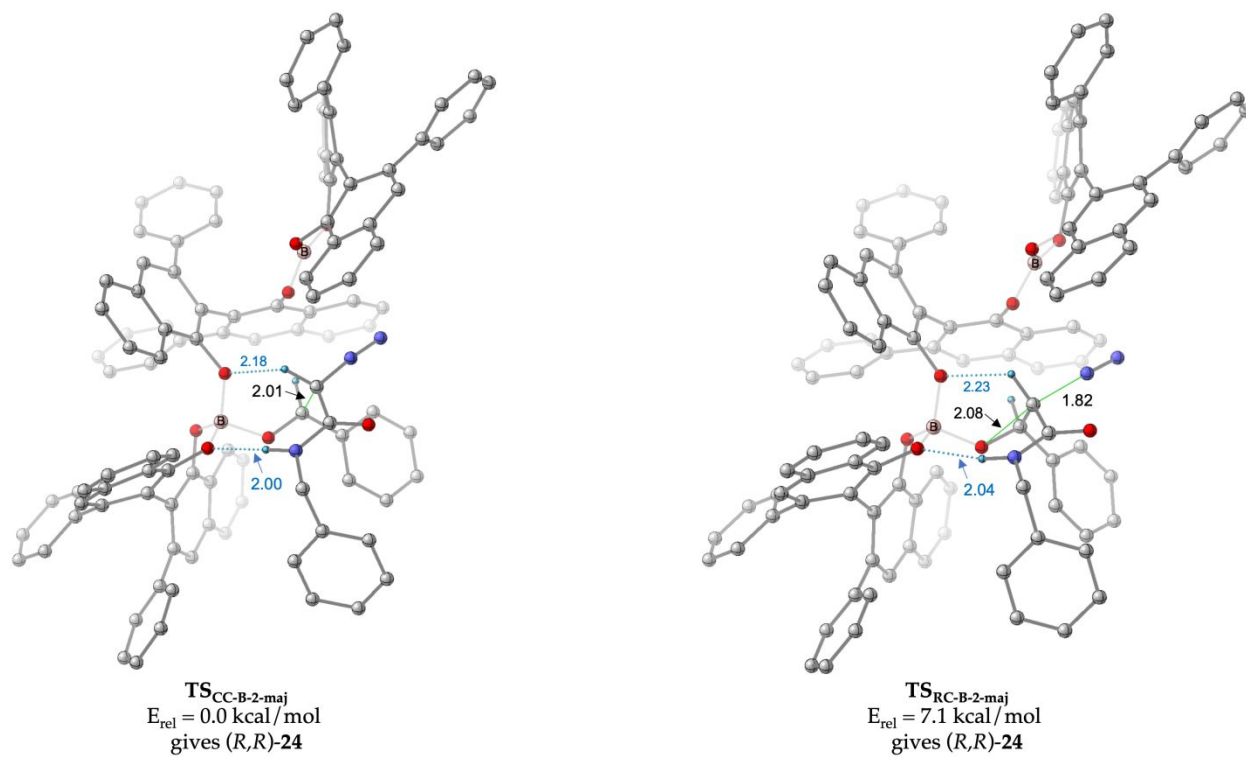

Figure S16: Determination of rate- and selectivity determining step. Lowest-lying transition structure for carbon-carbon bond forming and ring-closing TS for (*R*)-VANOL-B-2 catalyst.

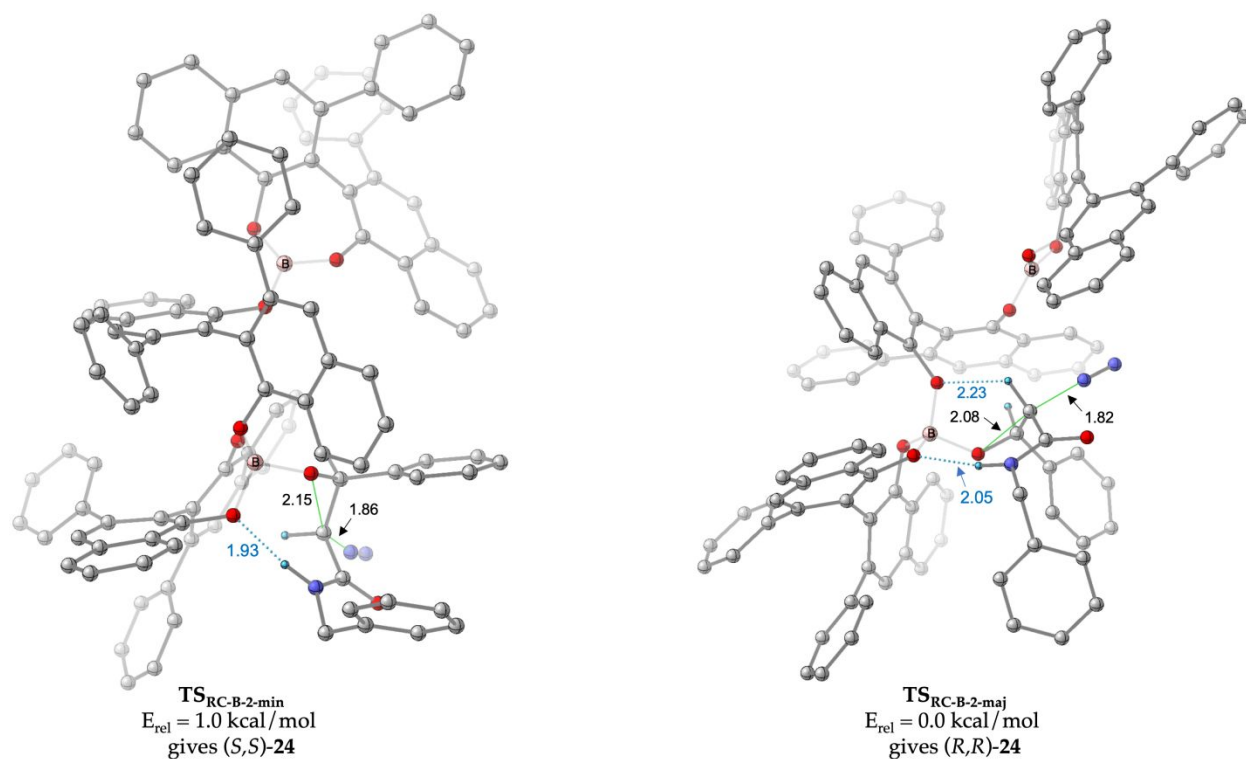

Figure S17: Lowest-lying transition structures for ring-closing step for (*R*)-VANOL-B-2 catalyst.

### 23. Pentacoordinated Aluminum

Another catalyst conformation of aluminum was also explored (Figure S18). This new conformation is comprised of a tetracoordinated aluminum with a protonated oxygen atom of one ligand. The aluminum was found in a nearly tetrahedral geometry in the located transition structures for the major enantiomer, with three of the Al-O bonds ranging from 1.78-1.83 Å and the hydrogen-bearing oxygen at 2.11 Å. All attempts to locate a similar conformation for boron resulted in a catalyst structure resembling that of the Brønsted Acid-assisted Lewis Acid pathway. The modeled TSs for the key carbon-carbon bond forming and ring-closing step experience similar stabilizing interactions between the reactant and catalyst compared to the TSs for the BLA pathway, as discussed earlier. A strong intermolecular hydrogen bonding interaction between the NH of diazo and the oxygen atom of the catalyst and a weak non-covalent interaction between the

$\alpha$ -CH of diazo and the oxygen atom of the catalyst was noted. Another intermolecular hydrogen bonding interaction between the hydrogen-bearing oxygen of the ligand and the carbonyl oxygen atom of the aldehyde was also observed. However, the free energy barriers for the lowest-lying transition structures for carbon-carbon bond formation and the subsequent ring-closing step were found significantly higher in energy compared to the lowest-energy carbon-carbon bond formation TS in the operational BLA pathway ( $\text{TS}_{\text{CC-Al-2-maj}} = 12.3$  kcal/mol and  $\text{TS}_{\text{RC-Al-2-maj}} = 18.2$  kcal/mol relative to the lowest transition structure located for  $\text{TS}_{\text{CC-Al-BLA-maj}}$ ). The key features and bond distances for the modeled TSs of this pathway are shown in Figure S19.

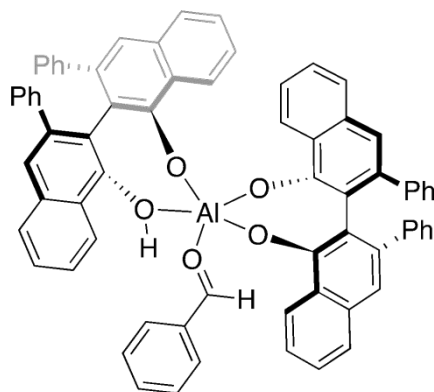

Figure S18: Modeled catalyst conformation for (*R*)-VANOL-Al-2 catalyst.

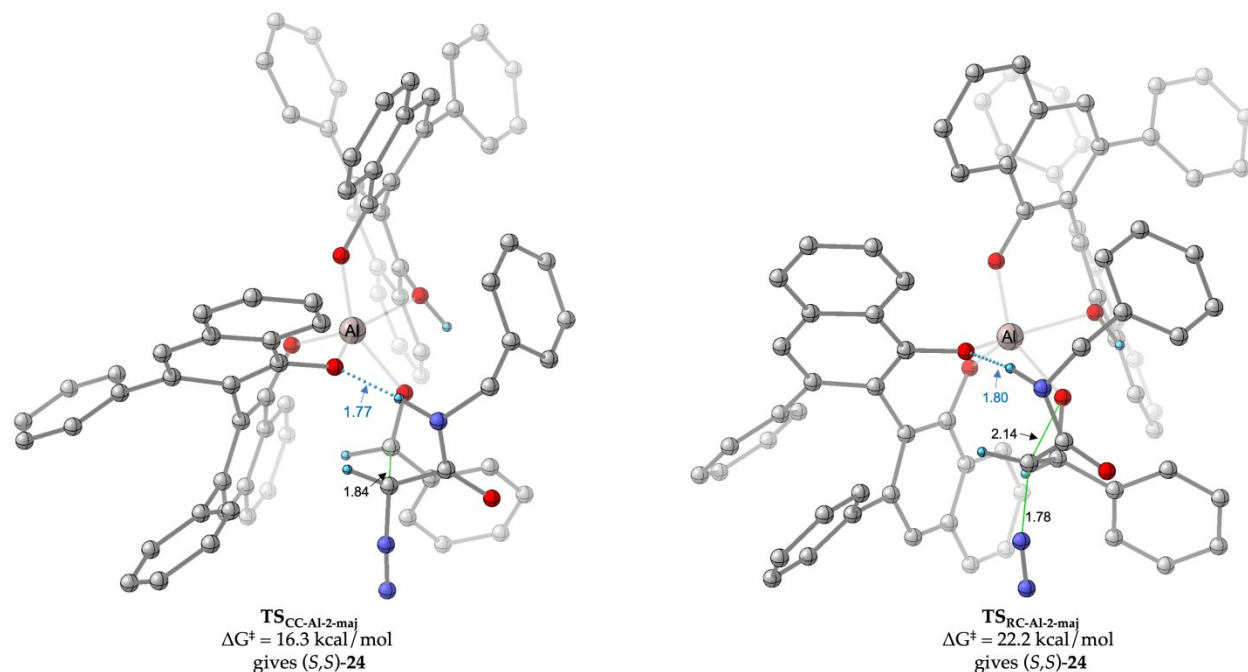

Figure S19: Lowest-lying transition structure for carbon-carbon bond forming and ring-closing step for major enantiomer.

## 24. Comparison of various computational methods

To ensure an unbiased interpretation of the relative free energy differences ( $\Delta\Delta G^\ddagger$ ) between the calculated transition structures for the selectivity-determining step, the lowest energy conformations for VANOL-derived boron and aluminum catalyzed epoxidation reactions were modeled using both B3LYP-D3/6-31G\* and M06-2X/6-31G\*. Single point energy calculations for these transition states along the BLA pathway were performed using M06-2X/6-311++G\*\* and a PCM solvent model for toluene. The relative energies between the modeled enantiomers for the selectivity-determining step remain almost consistent for each metal employed. The  $\Delta\Delta G^\ddagger$  between the VANOL-derived aluminum catalyzed epoxidation transition structures was found to be 0.6 kcal/mol. This corresponds to a predicted ee of 50%, slightly lower than the experimentally observed ee of 81%, however an extensive conformational search was not performed with this

level of theory (Figure S20). The computed free energy difference ( $\Delta\Delta G^\ddagger$ ) between the transition structures of the two enantiomers for the VANOL-derived boron catalyzed epoxidation was found to be 3.1 kcal/mol, predicting an ee > 99% - a value qualitatively consistent with the experimentally observed ee of 96% (Figure S21).

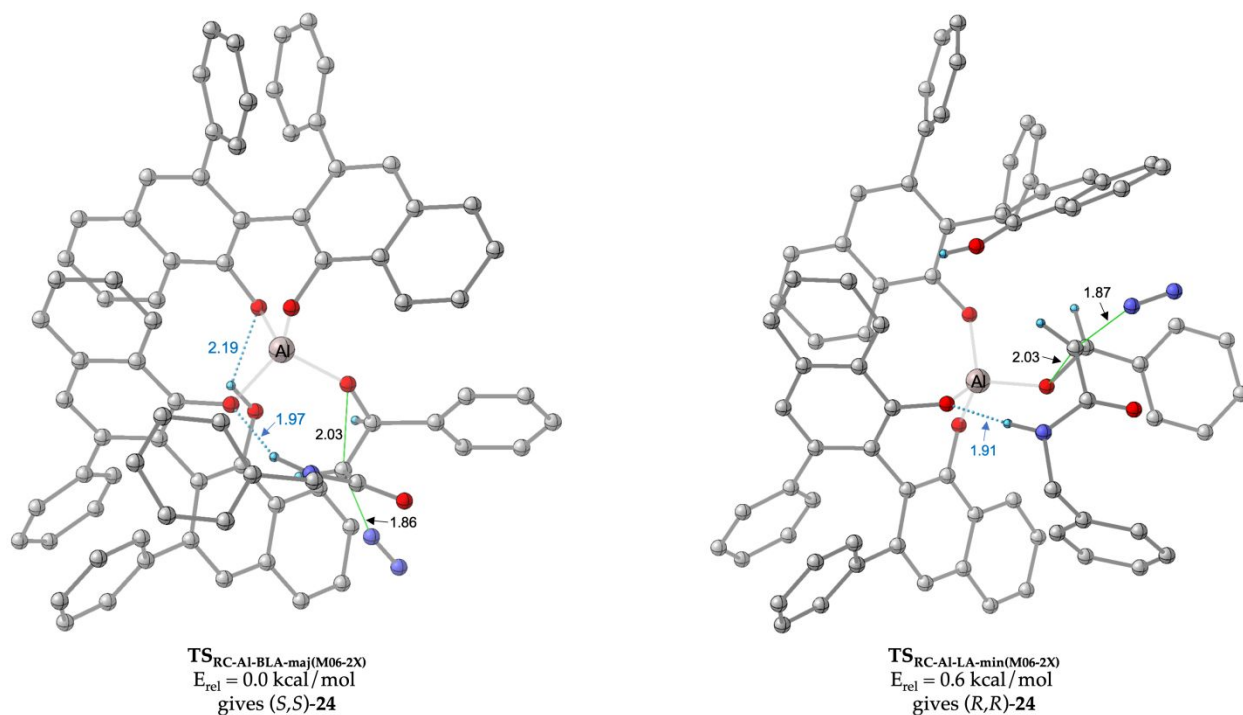

Figure S20: Lowest-lying transition structure for the ring-closing step (TS<sub>RC-Al-BLA-M06-2X</sub>) for BLA pathway using M06-2X/6-311++G\*\* PCM (toluene)//M06-2X/6-31G\* at 273 K.

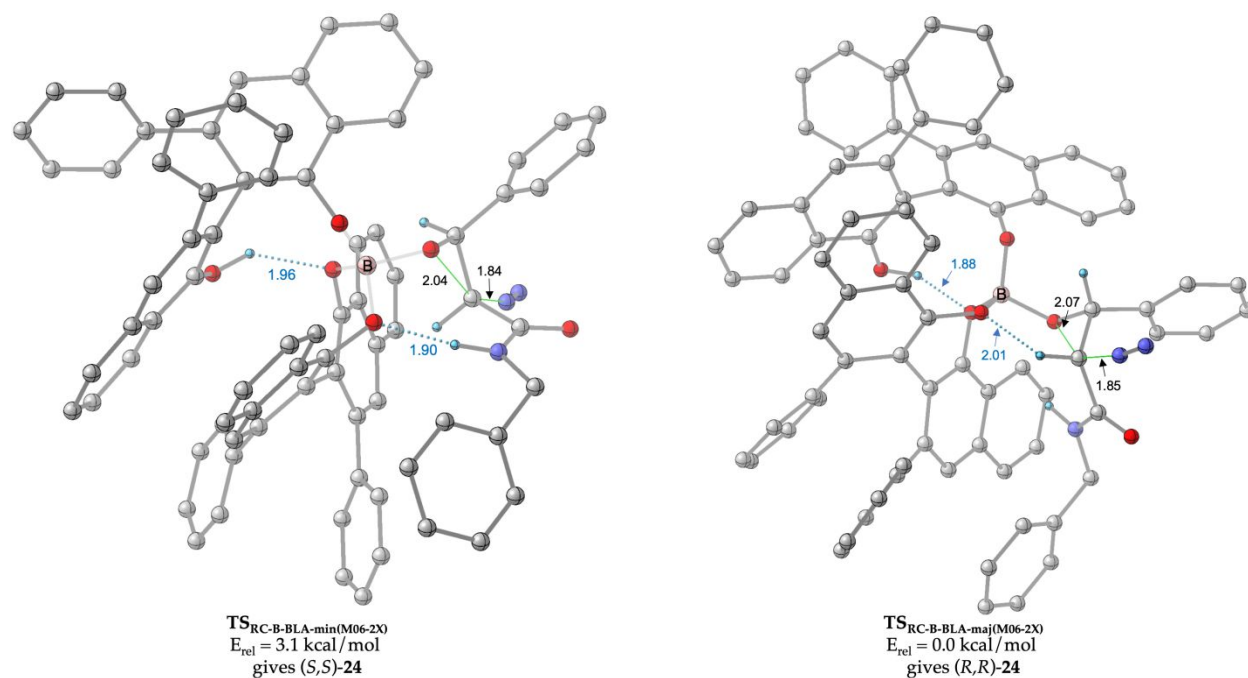

Figure S21: Lowest-lying transition structure for the ring-closing step ( $\text{TS}_{\text{RC-B-BLA-M06-2X}}$ ) for BLA pathway using M06-2X/6-311++G\*\* PCM (Toluene)//M06-2X/6-31G\* at 233 K.

We also evaluated the relative free energy differences for the selectivity-determining step using B3LYP-D3(BJ)/6-311++G\*\* PCM (Toluene)//B3LYP-D3/6-31G\* as well as with  $\omega$ B97-xD/6-311++G\*\* PCM (Toluene)//B3LYP-D3/6-31G\*. The qualitative trends remain the same regardless of the functional utilized (Table S5).

SP1: M06-2X//6-311++G\*\* PCM (Toluene)//B3LYP-D3/6-31G\* (in manuscript)

SP2: B3LYP-D3(BJ)/6-311++G\*\* PCM (Toluene)//B3LYP-D3/6-31G\*

SP3:  $\omega$ B97-xD/6-311++G\*\* PCM (Toluene)//B3LYP-D3/6-31G\*

| Boron catalyst TSs                | SP1 (in manuscript) | SP2  | SP3  |
|-----------------------------------|---------------------|------|------|
| $\text{TS}_{\text{RC-B-BLA-maj}}$ | 0.0                 | 0.0  | 0.0  |
| $\text{TS}_{\text{RC-B-BLA-min}}$ | +3.2                | +1.2 | +1.7 |



| Aluminum catalyst TSs       | SP1 (in manuscript) | SP2  | SP3  |
|-----------------------------|---------------------|------|------|
| TS <sub>RC-AI-BLA-maj</sub> | 0.0                 | 0.0  | 0.0  |
| TS <sub>RC-AI-LA-min</sub>  | +1.8                | +3.0 | +4.4 |

Table S5: Relative free energy differences between the lowest energy transition structures leading to either enantiomer in both catalyst systems.

We further optimized the lowest energy transition structures leading to either enantiomer in both catalyst systems using B3LYP-D3/6-31G\*\* (with additional polarization function) followed by single-point energy corrections using M06-2X/6-311++G\*\* PCM (Toluene). The relative free energies and transition state geometries remained largely the same (Figure S22 and S23).

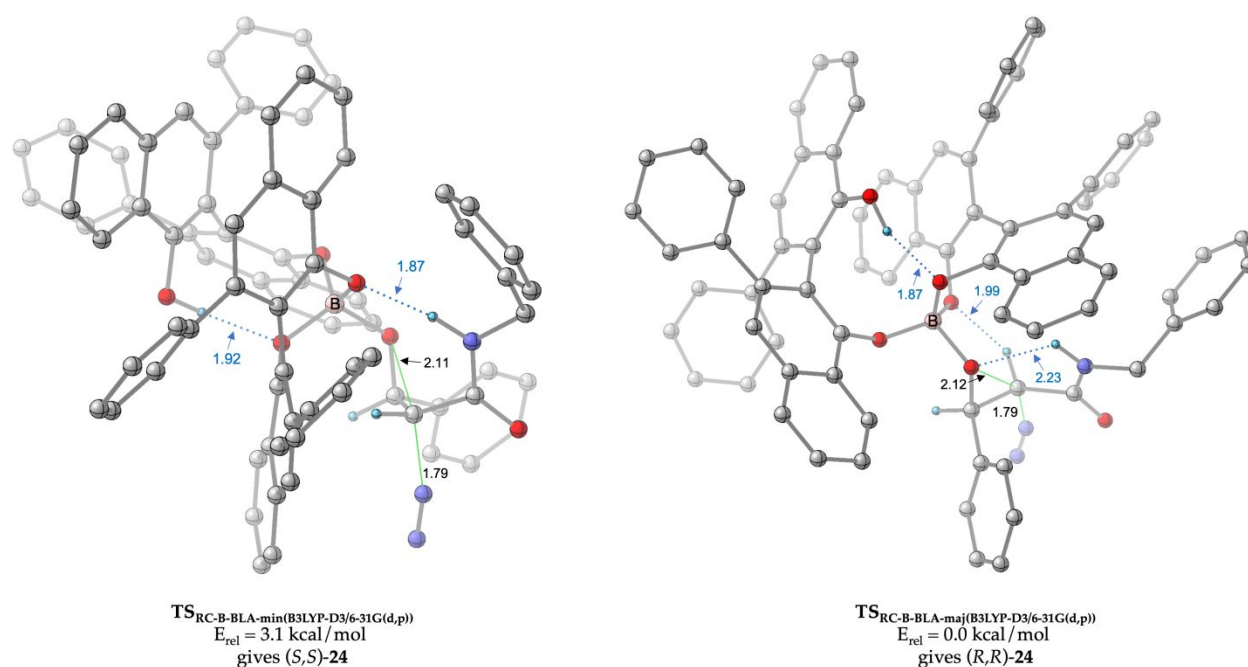

Figure S22: Lowest-lying transition structure for the ring-closing step (TS<sub>RC-B-BLA</sub>) for BLA pathway using M06-2X/6-311++G\*\* PCM (Toluene)//B3LYP-D3/6-31G\*\* at 233 K.

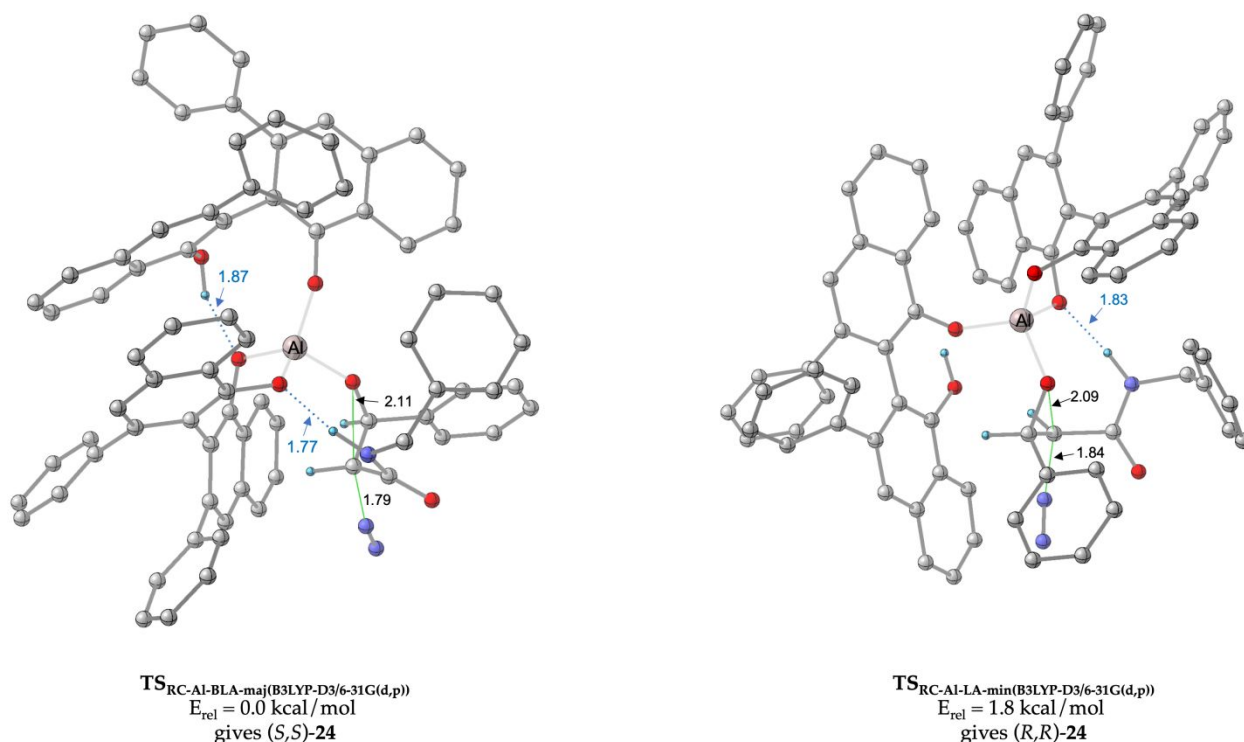

Figure S23: Lowest-lying transition structure for the ring-closing step ( $\text{TS}_{\text{RC-Al-BLA/LA}}$ ) for BLA pathway using M06-2X/6-311++G\*\* PCM (Toluene)//B3LYP-D3/6-31G\*\* at 273 K.

Additionally, we also utilized B3LYP-D3/6-31G\*\* CPCM (Toluene) (inclusion of implicit solvent model and polarization function) to optimize the lowest energy transition structures leading to either enantiomer in both catalyst systems followed by single-point energy calculations using M06-2X/6-311++G\*\* PCM (Toluene). The relative free energies between the two enantiomers in both catalyst systems and transition state geometries also remained largely the same. The  $\Delta\Delta G^\ddagger$  between the VANOL-derived aluminum catalyzed epoxidation transition structures was found to be 1.6 kcal/mol whereas the  $\Delta\Delta G^\ddagger$  between the transition structures of the two enantiomers for the VANOL-derived boron catalyzed epoxidation was found to be 3.3 kcal/mol.

## 25. Analysis of key transition structures for selectivity-determining step for BLA pathway

Boron: We performed distortion-interaction analysis<sup>24</sup> on the transition structures for the selectivity-determining step,  $\text{TS}_{\text{RC-B-BLA-maj}}$  and  $\text{TS}_{\text{RC-B-BLA-min}}$ , to qualitatively analyze their key differences and to assess the origin of the reaction's stereoselectivity (Table S6). In this analysis, the transition states were divided into two parts: (1) the Brønsted Acid-assisted Lewis acid complex, and (2) the diazo acetamide. Through these means, the transition state energy was decomposed into a distortion term, describing the energy required to distort the reactants from ground-state geometries into that of the TS, and an interaction term, describing the energy arising from interactions between these distorted fragments in the TS. From this analysis, it was observed that the TS leading to the (*R,R*)-**24** enantiomer ( $\text{TS}_{\text{RC-B-BLA-maj}}$ ) experiences fewer destabilizing distortions, 1.7 kcal/mol less compared to the TS leading to the minor (*S,S*)-**24** enantiomer ( $\text{TS}_{\text{RC-B-BLA-min}}$ ), with the diazo reactant distorting more compared to the catalyst fragment. Additionally,  $\text{TS}_{\text{RC-B-BLA-maj}}$  experiences 1.0 kcal/mol more energy from favorable interactions within the TS compared to  $\text{TS}_{\text{RC-B-BLA-min}}$ . These results demonstrate that the difference in the enantioselectivity of the computed enantiomers is a consequence of distortion and interaction energies with both favoring in the TS leading to the (*R,R*)-**24** enantiomer ( $\text{TS}_{\text{RC-B-BLA-maj}}$ ). These results demonstrate that both distortion and interaction energy favor the major computed (*R,R*)-**24** enantiomer ( $\text{TS}_{\text{RC-B-BLA-maj}}$ ) in the boron-catalyzed reaction with the distortion component contributing to a greater degree.

| Favors ( <i>R,R</i> )- <b>24</b> [ <i>major</i> ]                                                    |                                 |                        |                        | Favors ( <i>S,S</i> )- <b>24</b> [ <i>minor</i> ] |                         |                       |                        |                              |
|------------------------------------------------------------------------------------------------------|---------------------------------|------------------------|------------------------|---------------------------------------------------|-------------------------|-----------------------|------------------------|------------------------------|
|                                                                                                      | <b>Distortion</b><br>(kcal/mol) | Dist-Cat<br>(kcal/mol) | Dist-Rct<br>(kcal/mol) | <b>Interaction</b><br>(kcal/mol)                  | Int-Disp.<br>(kcal/mol) | Int-ESP<br>(kcal/mol) | Int-Rem.<br>(kcal/mol) | <b>Overall</b><br>(kcal/mol) |
| <b>TS<sub>RC-B-BLA-maj</sub></b>                                                                     | 82.6                            | 44.5                   | 38.1                   | -97.9                                             | -4.2                    | -15.7                 |                        |                              |
| <b>TS<sub>RC-B-BLA-min</sub></b>                                                                     | 84.3                            | 44.9                   | 39.4                   | -96.9                                             | -3.9                    | -21.3                 |                        |                              |
| $\Delta\Delta E^\ddagger$<br>( <b>TS<sub>RC-B-BLA-maj</sub></b> - <b>TS<sub>RC-B-BLA-min</sub></b> ) | <b>-1.7</b>                     | <b>-0.4</b>            | <b>-1.3</b>            | <b>-1.0</b>                                       | <b>-0.3</b>             | <b>+5.6</b>           | <b>-6.3</b>            | <b>-2.6</b>                  |

Table S6: Components of the distortion/interaction analysis for the enantioselectivity-determining TS using M06-2x-D3/6-311++G\*\* PCM (toluene).<sup>25</sup> Distortion of the catalyst (Cat) and reactant (Rct) as well as overall interaction energy, including dispersion (Disp.), electrostatic potential (ESP) and the remaining interactions such as electron repulsion and charge transfer (Rem.), are highlighted. Energy differences are reported in kcal/mol.

Aluminum: Similar analysis was carried out for the aluminum-catalyzed reaction to analyze the key differences between **TS<sub>RC-Al-BLA-maj</sub>** leading to (*S,S*)-**24** and **TS<sub>RC-Al-BLA-min</sub>** leading to (*R,R*)-**24** (Table S7). For this system, the ground state catalyst and reactant of the TS leading to the major (*S,S*)-**24** enantiomer (**TS<sub>RC-Al-BLA-maj</sub>**) undergo significantly less distortions to attain TS-like geometry, namely 5.5 kcal/mol less, compared to the TS leading to the minor (*R,R*)-**24** enantiomer (**TS<sub>RC-Al-BLA-min</sub>**) with the majority of this difference (3.2 kcal/mol) arising from the distortion of the diazo reactant. Although the distortion component of the energy decomposition analysis favors the TS leading to the major (*S,S*)-**24** enantiomer by 5.5 kcal/mol, the interaction component actually favors that of the minor (*R,R*)-**24** enantiomer. **TS<sub>RC-Al-BLA-min</sub>** experiences 3.4 kcal/mol

more energy from interactions compared to  $\text{TS}_{\text{RC-Al-BLA-maj}}$ . As such, the enantioselectivity for the computed aluminum-catalyzed system is determined by the degree of distortion needed to achieve transition state-like geometry, with fewer distortions necessitated in the TS leading to the major (*S,S*)-**24** product.

| Favors ( <i>R,R</i> )- <b>24</b> [ <i>minor</i> ]                                                                         |                   |             |             | Favors ( <i>S,S</i> )- <b>24</b> [ <i>major</i> ] |             |             |             |                |
|---------------------------------------------------------------------------------------------------------------------------|-------------------|-------------|-------------|---------------------------------------------------|-------------|-------------|-------------|----------------|
|                                                                                                                           | <b>Distortion</b> | Dist-Cat    | Dist-Rct    | <b>Interaction</b>                                | Int-Disp.   | Int-ESP     | Int-Rem.    | <b>Overall</b> |
|                                                                                                                           | (kcal/mol)        | (kcal/mol)  | (kcal/mol)  | (kcal/mol)                                        | (kcal/mol)  | (kcal/mol)  | (kcal/mol)  | (kcal/mol)     |
| $\text{TS}_{\text{RC-Al-BLA-maj}}$                                                                                        | 83.4              | 44.7        | 38.7        | -101.7                                            | -4.6        | -25.2       |             |                |
| $\text{TS}_{\text{RC-Al-LA-min}}$                                                                                         | 88.9              | 47.0        | 41.9        | -105.1                                            | -4.2        | -24.4       |             |                |
| $\Delta\Delta E^\ddagger_{\text{major}}$<br>( $\text{TS}_{\text{RC-Al-BLA-maj}}$<br>- $\text{TS}_{\text{RC-Al-LA-min}}$ ) | <b>-5.5</b>       | <b>-2.3</b> | <b>-3.2</b> | <b>+3.4</b>                                       | <b>-0.4</b> | <b>-0.8</b> | <b>+4.6</b> | <b>-2.1</b>    |

Table S7: Components of the distortion/interaction analysis for the enantioselectivity-determining TS using M06-2x-D3/6-311++G\*\* PCM (toluene). Distortion of the catalyst (Cat) and reactant (Rct) as well as overall interaction energy, including dispersion (Disp.), electrostatic potential (ESP) and the remaining interactions such as electron repulsion and charge transfer (Rem.), are highlighted. Energy differences are reported in kcal/mol.

Non-Covalent Interaction Plots: Non-covalent interaction (NCI) plots<sup>26-28</sup> were generated to illustrate the differing magnitude of dispersive energy between the catalyst and reactant fragments for both the boron-catalyzed and aluminum-catalyzed reactions (Figure S24). Comparing the boron-catalyzed transition states,  $\text{TS}_{\text{RC-B-BLA-maj}}$  and  $\text{TS}_{\text{RC-B-BLA-min}}$ , they exhibit similar amounts and types of dispersion interactions, primarily hydrogen bonding between the reactant fragment and the borate oxygen atoms. Comparing the aluminum-catalyzed transition states, the transition

state leading to the major (*S,S*)-**24** enantiomer (**TS<sub>RC-Al-BLA-maj</sub>**) exhibits hydrogen-bonding with the aluminate oxygen atoms, CH— $\pi$  interactions and van der Waal dispersions with the reactant fragment and the catalyst scaffold. The transition state leading to the minor (*R,R*)-**24** enantiomer (**TS<sub>RC-Al-LA-min</sub>**) exhibits the aforementioned dispersion interactions in addition to a significant N<sub>2</sub>— $\pi$  interaction.

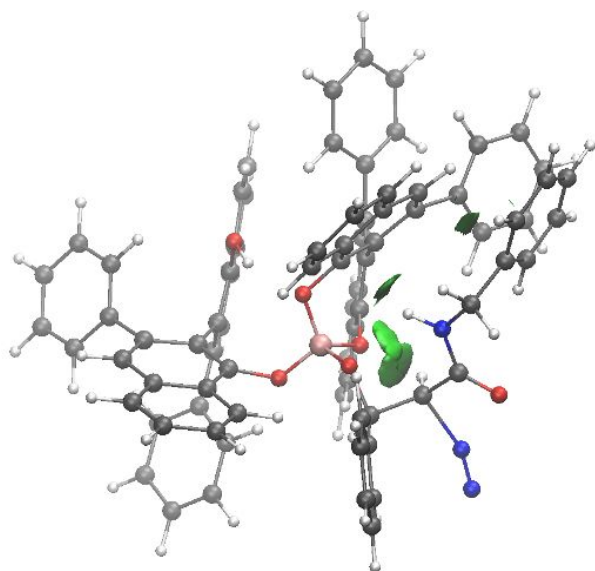

**TS<sub>RC-B-BLA-maj</sub>**  
gives (R,R)-24

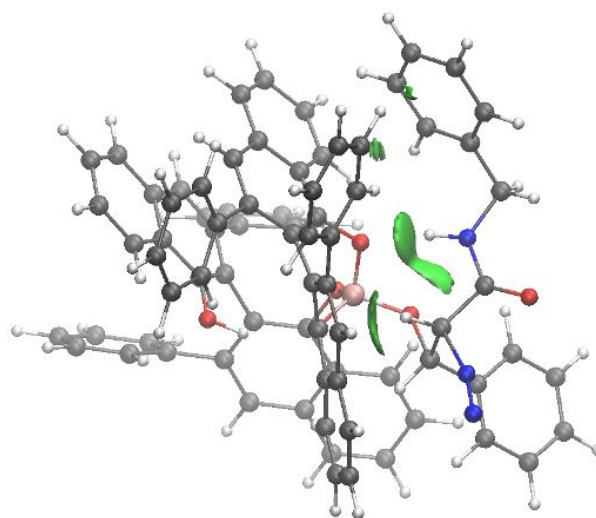

**TS<sub>RC-B-BLA-min</sub>**  
gives (S,S)-24

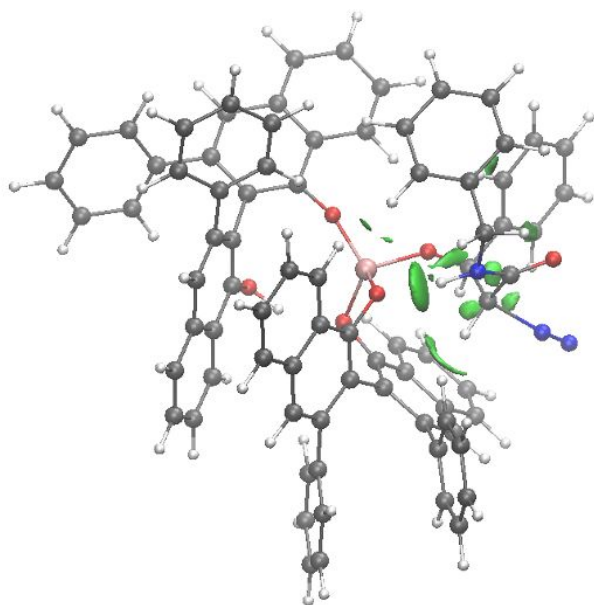

**TS<sub>RC-Al-BLA-maj</sub>**  
gives (S,S)-24

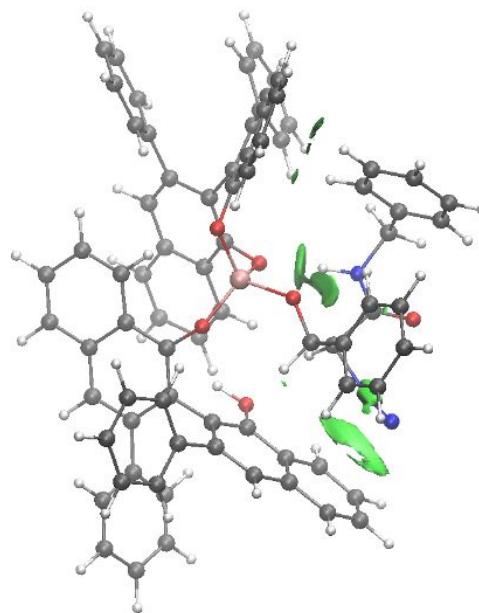

**TS<sub>RC-Al-LA-min</sub>**  
gives (R,R)-24

Figure S24: Non-covalent interaction plots for the transition states leading to the (*S,S*)-**24** and (*R,R*)-**24** products for both boron- and aluminum-catalyzed reactions are shown above. Dispersion interactions between the catalyst fragment (Brønsted Acid-assisted Lewis acid complex) and the reactant (the diazo acetamide) are depicted in green (isosurface of 0.01).

## 26. Energetics for different possible conformations

In this section, the energies of the all the calculated transition structures for all the described pathways in manuscript and supporting information for VANOL derived boron and aluminum catalyst are included. All the lowest energy transition structures discussed in manuscript/SI are highlighted (with same name) in red and corresponding higher energy conformations are also reported.

1. TS Geometry VANOL-Al – All the possible transition state conformations for different pathways calculated for VANOL-derived aluminum catalyst for epoxidation reaction
2. Extrapolated\_SP\_273K – qRRHO free-energy corrected single points at 233K
3. RE (kcal/mol) – All single point free energy differences are calculated relative to the lowest lying pre-reactive complex shown in Figure 1 in manuscript

Lowest-lying TSs for key carbon-carbon bond forming and ring-closing steps for each pathway described in the manuscript and supporting information are highlighted in red.

Table S8: Energetics of various conformations calculated for VANOL-Al catalyzed epoxidation of aldehydes (relative to the aluminum pre-reactive complex)

| TS Geometry VANOL-Al <sup>1</sup> | Extrapolated_SP_273K –<br>qRRHO <sup>2</sup> | RE <sup>3</sup> |
|-----------------------------------|----------------------------------------------|-----------------|
| <b>TS-CC-Al-BA-maj</b>            | <b>-3938.95864</b>                           | <b>8.5</b>      |
| TS-CC-Al-BA-maj-a                 | -3938.95864                                  | 8.5             |
| TS-CC-Al-BA-maj-b                 | -3938.95767                                  | 9.1             |



|                         |                    |             |
|-------------------------|--------------------|-------------|
| <b>TS-CC-AI-BLA-maj</b> | <b>-3938.96573</b> | <b>4.0</b>  |
| TS-CC-AI-BLA-maj-a      | -3938.96409        | 5.0         |
| TS-CC-AI-BLA-maj-b      | -3938.95969        | 7.8         |
| <b>TS-CC-AI-BA-min</b>  | <b>-3938.95795</b> | <b>8.9</b>  |
| TS-CC-AI-BA-min-a       | -3938.95770        | 9.0         |
| TS-CC-AI-BA-min-b       | -3938.95526        | 10.6        |
| TS-CC-AI-BA-min-c       | -3938.95622        | 10.0        |
| <b>TS-CC-AI-BLA-min</b> | <b>-3938.95914</b> | <b>8.1</b>  |
| TS-CC-AI-BLA-min-a      | -3938.94449        | 17.3        |
| TS-CC-AI-BLA-min-b      | -3938.94357        | 17.9        |
| TS-CC-AI-BLA-min-c      | -3938.94853        | 14.8        |
| TS-CC-AI-BLA-min-d      | -3938.94733        | 15.5        |
| <b>TS-RC-AI-BA-maj</b>  | <b>-3938.95599</b> | <b>10.1</b> |
| TS-RC-AI-BA-maj-a       | -3938.95182        | 12.7        |
| TS-RC-AI-BA-maj-b       | -3938.95137        | 13.0        |
| <b>TS-RC-AI-BLA-maj</b> | <b>-3938.95868</b> | <b>8.4</b>  |
| TS-RC-AI-BLA-maj-a      | -3938.95002        | 13.9        |
| TS-RC-AI-BLA-maj-b      | -3938.94196        | 18.9        |
| TS-RC-AI-BLA-maj-c      | -3938.95669        | 9.7         |
| TS-RC-AI-BLA-maj-d      | -3938.95542        | 10.5        |
| TS-RC-AI-BLA-maj-e      | -3938.95579        | 10.2        |
| TS-RC-AI-BLA-maj-f      | -3938.95460        | 11.0        |
| TS-RC-AI-BLA-maj-g      | -3938.95626        | 9.9         |
| TS-RC-AI-BLA-maj-i      | -3938.94694        | 15.8        |

|                         |                    |             |
|-------------------------|--------------------|-------------|
| TS-RC-AI-BLA-maj-j      | -3938.94783        | 15.2        |
| TS-RC-AI-BLA-maj-k      | -3938.95392        | 11.4        |
| TS-RC-AI-BLA-maj-l      | -3938.95079        | 13.4        |
| TS-RC-AI-BLA-maj-m      | -3938.95455        | 11.0        |
| TS-RC-AI-BLA-maj-n      | -3938.95375        | 11.5        |
| TS-RC-AI-BLA-maj-q      | -3938.95604        | 10.1        |
| TS-RC-AI-BLA-maj-r      | -3938.95524        | 10.6        |
| TS-RC-AI-BLA-maj-s      | -3938.95174        | 12.8        |
| TS-RC-AI-BLA-maj-t      | -3938.95604        | 10.1        |
| TS-RC-AI-BLA-maj-u      | -3938.95694        | 9.5         |
| TS-RC-AI-BLA-maj-v      | -3938.95615        | 10.0        |
| TS-RC-AI-BLA-maj-w      | -3938.95659        | 9.7         |
| TS-RC-AI-BLA-maj-x      | -3938.95510        | 10.7        |
| <b>TS-RC-AI-BA-min</b>  | <b>-3938.95468</b> | <b>10.9</b> |
| TS-RC-AI-BA-min-a       | -3938.95454        | 11.0        |
| TS-RC-AI-BA-min-b       | -3938.95454        | 11.0        |
| <b>TS-RC-AI-BLA-min</b> | <b>-3938.95287</b> | <b>12.1</b> |
| TS-RC-AI-LA-min-a       | -3938.95298        | 12.0        |
| TS-RC-AI-BLA-min-b      | -3938.94684        | 15.9        |
| TS-RC-AI-BLA-min-c      | -3938.94883        | 14.6        |
| TS-RC-AI-BLA-min-d      | -3938.95096        | 13.3        |
| TS-RC-AI-BLA-min-e      | -3938.94278        | 18.4        |
| TS-RC-AI-BLA-min-f      | -3938.94909        | 14.4        |
| TS-RC-AI-BLA-min-g      | -3938.95041        | 13.6        |

|                        |                    |             |
|------------------------|--------------------|-------------|
| TS-RC-Al-BLA-min-h     | -3938.94237        | 18.7        |
| TS-RC-Al-BLA-min-i     | -3938.94909        | 14.4        |
| TS-RC-Al-BLA-min-j     | -3938.95176        | 12.8        |
| TS-RC-Al-BLA-min-k     | -3938.94831        | 14.9        |
| TS-RC-Al-BLA-min-l     | -3938.94831        | 14.9        |
| TS-RC-Al-BLA-maj-o     | -3938.95460        | 11.0        |
| TS-RC-Al-LA-maj-a      | -3938.95170        | 12.8        |
| <b>TS-RC-Al-LA-maj</b> | <b>-3938.95193</b> | <b>12.7</b> |
| <b>TS-RC-Al-LA-min</b> | <b>-3938.95589</b> | <b>10.2</b> |
| TS-RC-Al-LA-min-a      | -3938.95254        | 12.3        |
| TS-CC-Al-2-maj         | -3938.94612        | 16.3        |
| TS-RC-Al-2-maj         | -3938.93672        | 22.2        |

1. TS Geometry VANOL-B – All the possible transition state conformations for different pathways calculated for VANOL-derived boron catalyst for epoxidation reaction

2. Extrapolated\_SP\_233K – qRRHO free-energy corrected single points at 233K

3. RE (kcal/mol) – All single point free energy differences are calculated relative to the lowest lying pre-reactive complex shown in Figure 1 in manuscript

Lowest-lying TSs for key carbon-carbon bond forming and ring-closing steps for each pathway described in the manuscript and supporting information are highlighted in red.

Table S9: Energetics of various conformations calculated for VANOL-B catalyzed epoxidation of aldehydes (relative to the boron pre-reactive complex)

| TS Geometry VANOL-B <sup>1</sup> | Extrapolated_SP_233K –<br>qRRHO <sup>2</sup> | RE <sup>3</sup> |
|----------------------------------|----------------------------------------------|-----------------|
| <b>TS-CC-B-BA-min</b>            | <b>-3721.29772</b>                           | <b>7.2</b>      |
| TS-CC-B-BA-min-a                 | -3721.29755                                  | 7.3             |
| TS-CC-B-BA-min-b                 | -3721.29772                                  | 7.2             |
| <b>TS-CC-B-BLA-min</b>           | <b>-3721.30100</b>                           | <b>5.2</b>      |
| TS-CC-B-BLA-min-a                | -3721.29895                                  | 6.5             |
| TS-CC-B-BLA-min-b                | -3721.29895                                  | 6.5             |
| <b>TS-CC-B-BA-maj</b>            | <b>-3721.29609</b>                           | <b>8.2</b>      |
| TS-CC-B-BA-maj-a                 | -3721.29441                                  | 9.3             |
| TS-CC-B-BA-maj-b                 | -3721.29442                                  | 9.3             |
| TS-CC-B-BA-maj-c                 | -3721.29128                                  | 11.3            |
| <b>TS-CC-B-BLA-maj</b>           | <b>-3721.30134</b>                           | <b>5.0</b>      |
| TS-CC-B-BLA-maj-a                | -3721.27556                                  | 21.1            |
| TS-CC-B-BLA-maj-b                | -3721.28225                                  | 16.9            |
| TS-CC-B-BLA-maj-c                | -3721.28328                                  | 16.3            |
| TS-CC-B-BLA-maj-d                | -3721.28424                                  | 15.7            |
| TS-CC-B-BLA-maj-e                | -3721.29735                                  | 7.5             |
| TS-CC-B-BLA-maj-f                | -3721.29656                                  | 7.9             |
| <b>TS-RC-B-BA-min</b>            | <b>-3721.29466</b>                           | <b>9.1</b>      |
| TS-RC-B-BA-min-a                 | -3721.29427                                  | 9.4             |
| TS-RC-B-BA-min-b                 | -3721.29435                                  | 9.3             |
| <b>TS-RC-B-BLA-min</b>           | <b>-3721.29315</b>                           | <b>10.1</b>     |
| TS-RC-B-BLA-min-a                | -3721.29112                                  | 11.4            |

|                        |                    |            |
|------------------------|--------------------|------------|
| TS-RC-B-BLA-min-b      | -3721.28633        | 14.4       |
| TS-RC-B-BLA-min-c      | -3721.28673        | 14.1       |
| TS-RC-B-BLA-min-d      | -3721.29314        | 10.1       |
| TS-RC-B-BLA-min-e      | -3721.28306        | 16.4       |
| TS-RC-B-BLA-min-f      | -3721.28571        | 14.8       |
| TS-RC-B-BLA-min-g      | -3721.27591        | 20.9       |
| TS-RC-B-BLA-min-h      | -3721.27929        | 18.8       |
| TS-RC-B-BLA-min-i      | -3721.28705        | 13.9       |
| TS-RC-B-BLA-min-j      | -3721.28706        | 13.9       |
| TS-RC-B-BLA-min-k      | -3721.29249        | 10.5       |
| <b>TS-RC-B-BA-maj</b>  | -3721.29426        | <b>9.4</b> |
| TS-RC-B-BA-maj-a       | -3721.29339        | 9.9        |
| TS-RC-B-BA-maj-b       | -3721.29475        | 9.1        |
| TS-RC-B-BA-maj-c       | -3721.29372        | 9.7        |
| <b>TS-RC-B-BLA-maj</b> | <b>-3721.29821</b> | 6.9        |
| TS-RC-B-BLA-maj-a      | -3721.27630        | 20.7       |
| TS-RC-B-BLA-maj-b      | -3721.27500        | 21.5       |
| TS-RC-B-BLA-maj-c      | -3721.27628        | 20.7       |
| TS-RC-B-BLA-maj-e      | -3721.27506        | 21.4       |
| TS-RC-B-BLA-maj-f      | -3721.28632        | 14.4       |
| TS-RC-B-BLA-maj-g      | -3721.28839        | 13.1       |
| TS-RC-B-BLA-maj-h      | -3721.28799        | 13.3       |
| TS-RC-B-BLA-maj-i      | -3721.28649        | 14.3       |
| TS-RC-B-BLA-maj-k      | -3721.27373        | 22.3       |

|                       |                    |             |
|-----------------------|--------------------|-------------|
| TS-RC-B-BLA-maj-m     | -3721.27679        | 20.4        |
| TS-RC-B-BLA-maj-n     | -3721.27736        | 20.0        |
| TS-RC-B-BLA-maj-o     | -3721.27506        | 21.4        |
| TS-RC-B-BLA-maj-p     | -3721.29528        | 8.8         |
| TS-RC-B-BLA-maj-q     | -3721.29040        | 11.8        |
| TS-RC-B-BLA-maj-r     | -3721.29396        | 9.6         |
| TS-RC-B-BLA-maj-s     | -3721.28569        | 14.8        |
| TS-RC-B-BLA-maj-t     | -3721.28677        | 14.1        |
| TS-RC-B-BLA-maj-u     | -3721.28645        | 14.3        |
| <b>TS-RC-B-LA-maj</b> | <b>-3721.29040</b> | <b>11.8</b> |
| TS-RC-B-LA-maj-a      | -3721.28838        | 13.1        |
| TS-RC-B-LA-maj-b      | -3721.28701        | 13.9        |
| <b>TS-RC-B-LA-min</b> | <b>-3721.29019</b> | <b>11.9</b> |
| TS-RC-B-LA-min-a      | -3721.27946        | 18.7        |
| TS-RC-B-LA-min-b      | -3721.28083        | 17.8        |

## 27. References

1. Ding, Z.; Osminski, W. E. G.; Ren, H.; Wulff, W. D. “Scalable Syntheses of the Vaulted Biaryl Ligands VAPOL and VANOL via the Cycloaddition/Electrocyclization Cascade” *Org. Proc. Res. & Dev.* **2011**, *15*, 1089-1107.
2. Guan, Y.; Ding, Z.; Wulff, W. D. “Vaulted Biaryls in Catalysis: A Structure–Activity Relationship Guided Tour of the Immanent Domain of the VANOL Ligand” *Chemistry – A European Journal* **2013**, *19*, 15565-15571.
3. Guan, Y.; Lu, Z.; Yin, X.; Mohammadlou, A.; Staples, R. J.; Wulff, W. D. “Catalytic Asymmetric Aziridination of Benzhydryl Imines and Diazoacetate Esters with BOROX Catalysts from 3, 3'-Disubstituted VANOL Ligands” *Synthesis* **2020**, *52*, 2073-2091.

4. a) Guan, Y. PhD Dissertation. Michigan State University 2012 b) Yin, X. PhD Dissertation. Michigan State University 2018.
5. Arai, T.; Sasai, H.; Aoe, K.; Okamura, K.; Date, T.; Shibasaki, M., “A New Multifunctional Heterobimetallic Asymmetric Catalyst for Michael Additions and Tandem Michael- Aldol Reactions.” *Angew. Chem. Int. Ed.* **1996**, *35*, 104–106.
6. Arai, T.; Sasai, H.; Yamaguchi, K.; Shibasaki, M., “Regioselective Catalytic Asymmetric Reaction of Horner–Wadsworth–Emmons Reagents with Enones: The Odyssey of Chiral Aluminum Catalysts.” *J. Am. Chem. Soc.* **1998**, *120*, 441–442.
7. Gupta, A. K.; Yin, X.; Mukherjee, M.; Desai, A.; Mohammadlou, A.; Jurewicz, K.; Wulff, W. D., “Catalytic Asymmetric Epoxidation of Aldehydes with Two VANOL-Derived Chiral Borate Catalysts.” *Angew. Chem. Int. Ed.* **2019**, *58*, 3361–3367.
8. Cronan, J. M.; Cardellina, J. H., “A Novel  $\delta$ -Lactam from the Sponge *Tedania Ignis*.” *Nat.l Prod. Lett.* **1994**, *5*, 85–88.
9. Lago, J. H. G.; Kato, M. J., “ $3\alpha,4\alpha$ -Epoxy-2-Piperidone, a New Minor Derivative from Leaves of Piper *Crassinervium* Kunth (Piperaceae).” *Nat. Prod. Res.* **2007**, *21*, 910–914.
10. Han, J.; Liu, L.; Chang, Y.; Yue, G.; Guo, J.; Zhou, L.; Li, C.; Yang, Z., “Asymmetric Total Synthesis of Caribenol A via an Intramolecular Diels-Alder Reaction.” *J. Org. Chem.* **2013**, *78*, 5492–5504.
11. Barry, C. S.; Bushby, N.; Harding, J. R.; Willis, C. L., “Stereoselective Synthesis of the Tetrahydropyran Core of Polycarvernoside A.” *Org. Lett.* **2005**, *7*, 2683–2686.
12. Trost, Barry M., and Mark J. Bartlett. 2012. “Transition-Metal-Catalyzed Synthesis of Aspergillide B: An Alkyne Addition Strategy.” *Org. Lett.* *14*, 1322–1325.
13. Liu, X.; Deaton, T. M.; Haeffner, F.; Morken, J. P., “A Boron Alkylidene-Alkene Cycloaddition Reaction: Application to the Synthesis of Aphanamal.” *Angew. Chem. Int. Ed.* **2017**, *56*, 11485–11489.
14. Wullschleger, C. W.; Gertsch, J.; Altmann, K., “Synthesis and Biological Activity of 7,8,9-Trideoxy- and 7 R DesTHP-Peloruside A.” *Chem. Eur. J.* **2013**, *19*, 13105–13111.
15. Sanford, A. B.; Thane, T. A.; McGinnis, T. M.; Chen, P.; Hong, X.; and Jarvo, E. R., “Nickel-Catalyzed Alkyl-Alkyl Cross-Electrophile Coupling Reaction of 1,3-Dimesylates for the Synthesis of Alkylcyclopropanes.” *J. Am. Chem. Soc.* **2020**, *142*, 5017–5023.
16. Li, X.; Borhan B. “Prompt Determination of Absolute Configuration for Epoxy Alcohols via Exciton Chirality Protocol” *J. Am. Chem. Soc.* **2008**, *130*, 16126–16127.
17. Gaussian 16, Revision A.03, Frisch, M. J.; Trucks, G. W.; Schlegel, H. B.; Scuseria, G. E.; Robb, M. A.; Cheeseman, J. R.; Scalmani, G.; Barone, V.; Petersson, G. A.; Nakatsuji, H.; Li, X.; Caricato, M.; Marenich, A. V.; Bloino, J.; Janesko, B. G.; Gomperts, R.; Mennucci, B.; Hratchian, H. P.; Ortiz, J. V.; Izmaylov, A. F.; Sonnenberg, J. L.; Williams-Young, D.; Ding, F.; Lipparini, F.; Egidi, F.; Goings, J.; Peng, B.; Petrone, A.; Henderson, T.; Ranasinghe, D.; Zakrzewski, V. G.; Gao, J.; Rega, N.; Zheng, G.; Liang, W.; Hada, M.; Ehara, M.; Toyota, K.; Fukuda, R.; Hasegawa, J.; Ishida, M.; Nakajima, T.; Honda, Y.; Kitao, O.; Nakai, H.; Vreven, T.; Throssell, K.; Montgomery, J. A., Jr.; Peralta, J. E.; Ogliaro, F.; Bearpark, M. J.; Heyd, J. J.; Brothers, E. N.; Kudin, K. N.; Staroverov, V. N.; Keith, T. A.; Kobayashi, R.; Normand, J.; Raghavachari, K.; Rendell, A. P.; Burant, J. C.; Iyengar, S. S.; Tomasi, J.; Cossi, M.; Millam, J. M.; Klene, M.; Adamo, C.; Cammi, R.; Ochterski, J. W.; Martin, R. L.; Morokuma, K.; Farkas, O.; Foresman, J. B.; Fox, D. J. Gaussian, Inc., Wallingford CT, 2016.

18. Zhao, Y.; Truhlar, D. G. The M06 suite of density functionals for main group thermochemistry, thermochemical kinetics, noncovalent interactions, excited states, and transition elements: two new functionals and systematic testing of four M06-class functionals and 12 other functionals. *Theor. Chem. Acc.* **2008**, *120*, 215-241.
19. a) Miertuš, S.; Scrocco, E.; Tomasi, J. Electrostatic interaction of a solute with a continuum. A direct utilization of AB initio molecular potentials for the prevision of solvent effects. *Chem. Phys.* **1981**, *55*, 117-129. (b) Tomasi, J.; Mennucci, B.; Cammi, R. Quantum mechanical continuum solvation models. *Chem. Rev.* **2005**, *105*, 2999-3094.
20. Becke, A. Density-Functional Thermochemistry. III. The Role of Exact Exchange. *J. Chem. Phys.*, *98*: 5648-5652. 1993.
21. Grimme, S.; Ehrlich, S.; Goerigk, L. Effect of the damping function in dispersion corrected density functional theory. *J. Comput. Chem.* **2011**, *32*, 1456-1465.
22. Hehre, W. J.; Stewart, R. F.; Pople, J. A. Self-Consistent Molecular-Orbital Methods. I. Use of Gaussian Expansions of Slater-Type Atomic Orbitals. *J. Chem. Phys.* **1969**, *51*, 2657-2664.
23. Grimme, S. Supramolecular binding thermodynamics by dispersion-corrected density functional theory. *Eur. J. Chem* **2012**, *18*, 9955-9964.
24. (a) Bickelhaupt, F. M.; Houk, K. N., Analyzing Reaction Rates with the Distortion/Interaction-Activation Strain Model. *Angew. Chem. Int. Ed. Engl.* **2017**, *56* (34), 10070-10086. (b) Ess, D. H.; Houk, K. N., Distortion/interaction energy control of 1,3-dipolar cycloaddition reactivity. *J. Am. Chem. Soc.* **2007**, *129* (35), 10646-7. (c) Maji, R.; Mallojjala, S. C.; Wheeler, S. E., Chiral phosphoric acid catalysis: from numbers to insights. *Chem. Soc. Rev.* **2018**, *47* (4), 1142-1158.
25. (a) Lockhart, Z.; Popescu, M.; Alegra-Requena, J.; Ahuja, J.; Paton, R.; Smith, M. A radical-polar crossover approach to complex nitrogen heterocycles via the triplet state. ChemRxiv. Cambridge: Cambridge Open engage; 2023. (b) Jones, B. A.; Solon, P.; Popescu, M. V.; Du, J-Y.; Paton, R.; Smith, M. D. Catalytic Enantioselective  $6\pi$  Photocyclization of Acrylanilides. *J. Am. Chem. Soc.* **2023**, *145*, 171-178.
26. Lu, T.; Chen, Q., Independent gradient model based on Hirshfeld partition: A new method for visual study of interactions in chemical systems. *J. Comput. Chem.* 2022, *43* (8), 539-555.
27. Lu, T.; Chen, F. Multiwfn: A multifunctional wavefunction analyzer. *J. Comput. Chem.* 2011, *33* (5), 580-592.
28. Humphrey, W., Dalke, A. and Schulten, K., "VMD - Visual Molecular Dynamics", *J. Molec. Graphics*, 1996, vol. 14, pp. 33-38.



(2*S*,3*S*)-**11**-<sup>1</sup>H-NMR (500 MHz -CDCl<sub>3</sub>); <sup>13</sup>C{<sup>1</sup>H} (126 MHz, CDCl<sub>3</sub>)

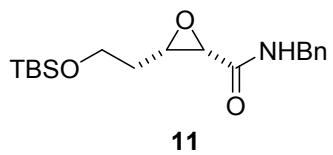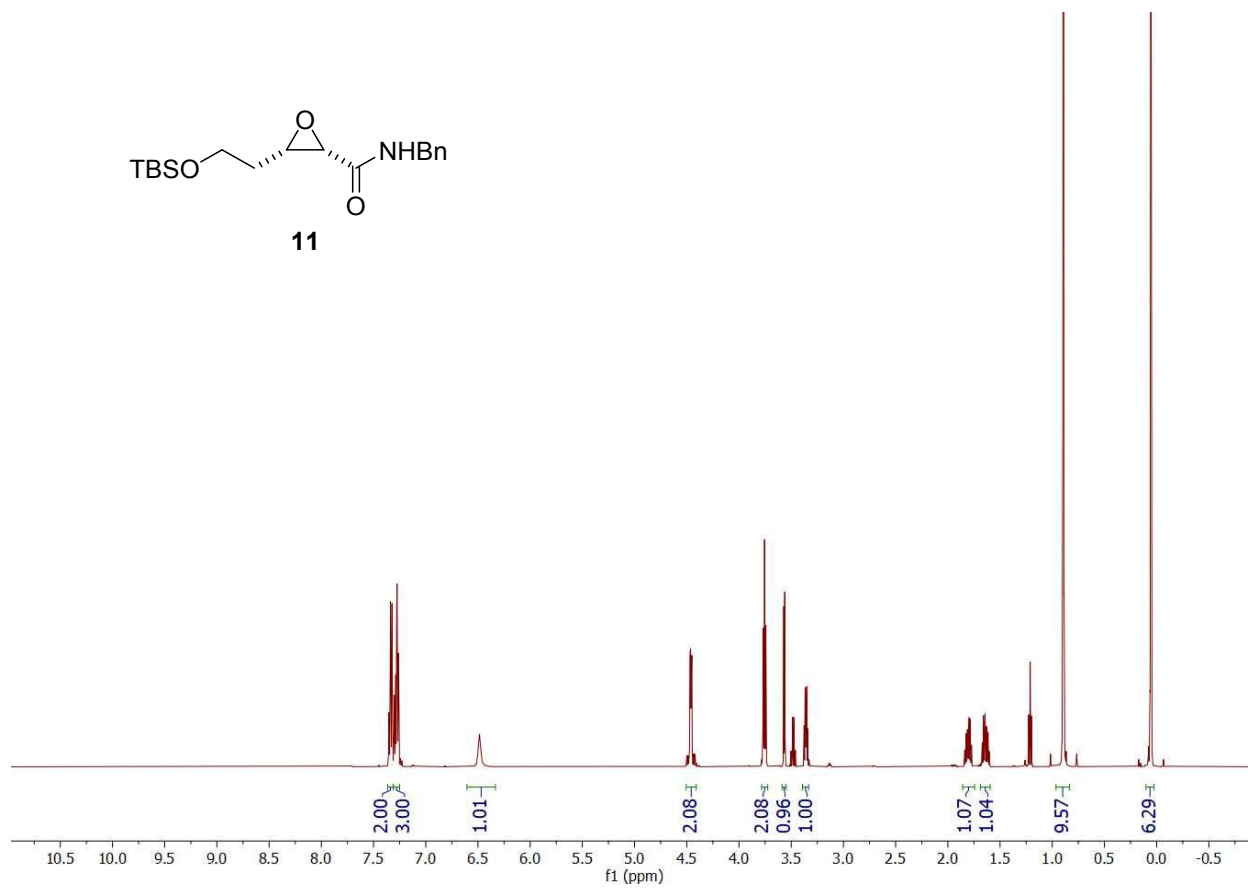

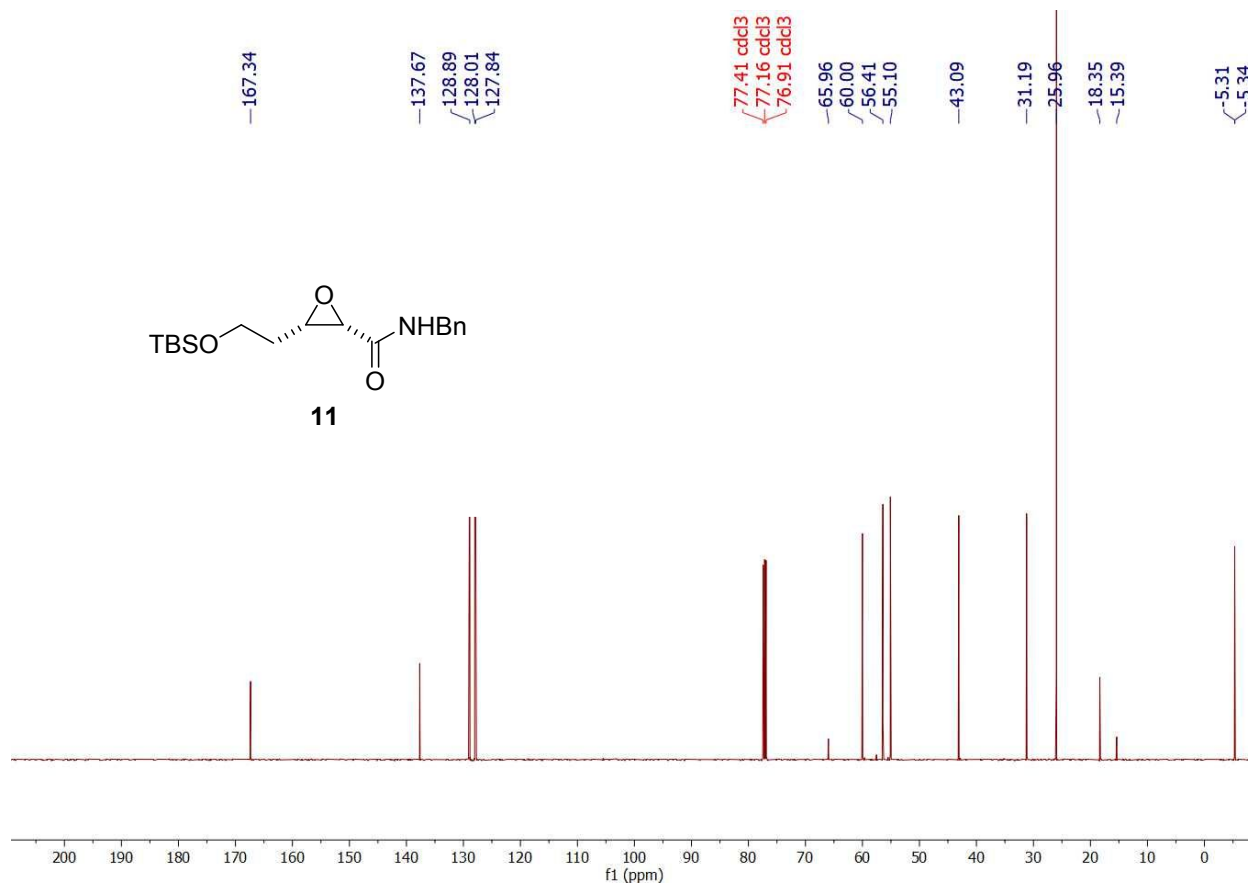

(2*S*,3*S*)-**11**- $^{13}\text{C}$ -NMR (500 MHz -CDCl<sub>3</sub>);  $^{13}\text{C}\{^1\text{H}\}$  (126 MHz, CDCl<sub>3</sub>)

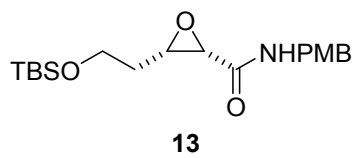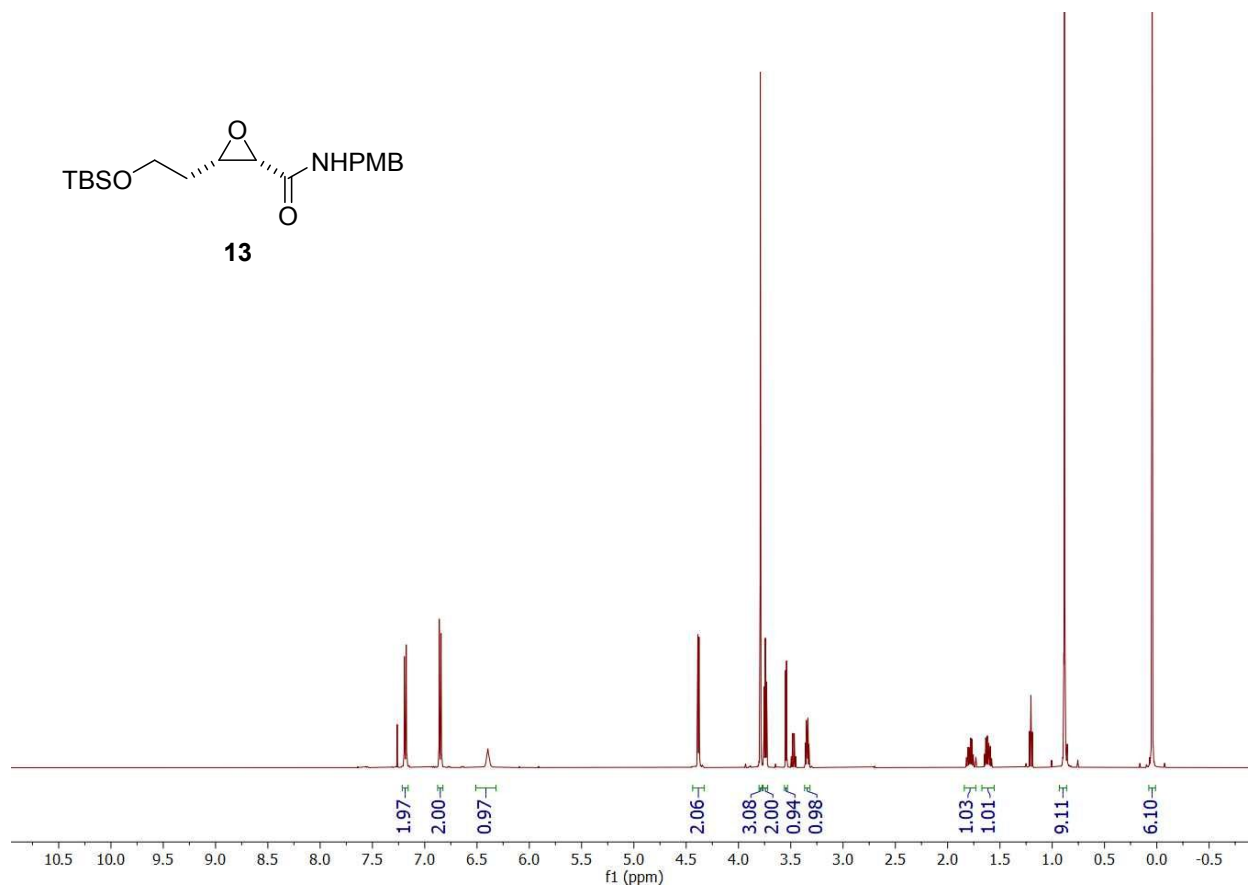

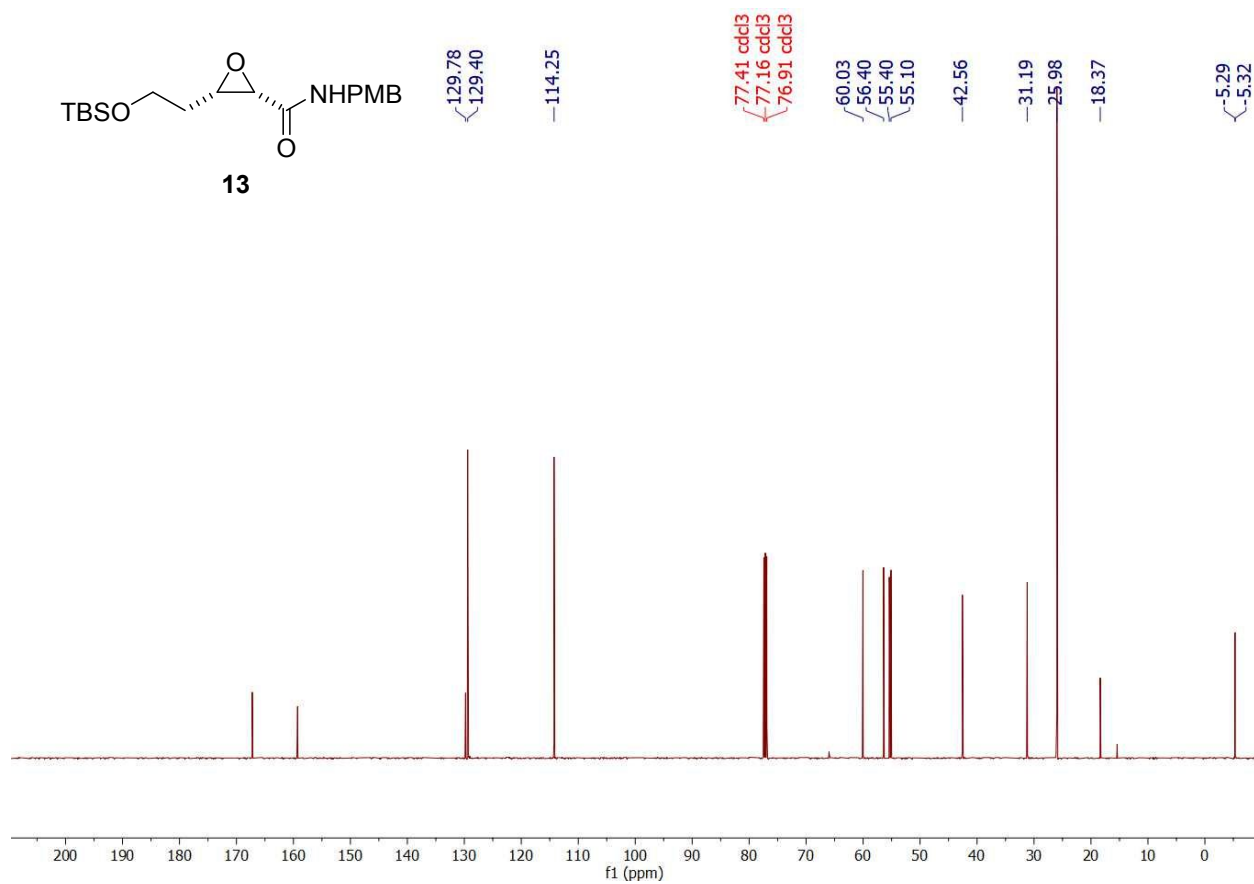

(2*S*,3*S*)-**14**- $^1\text{H}$ -NMR (500 MHz - $\text{CDCl}_3$ );  $^{13}\text{C}\{^1\text{H}\}$  (126 MHz,  $\text{CDCl}_3$ )

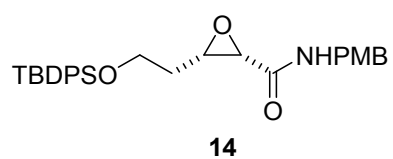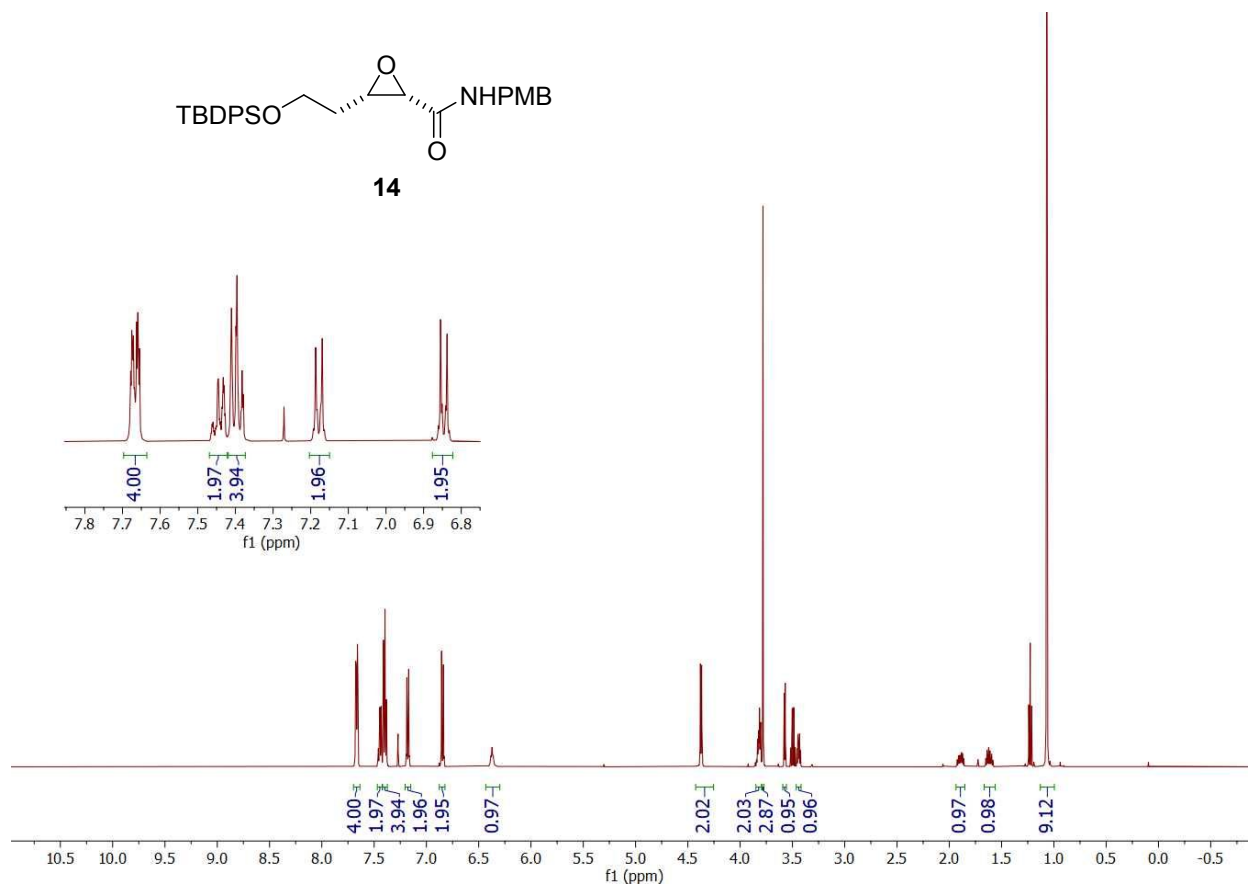

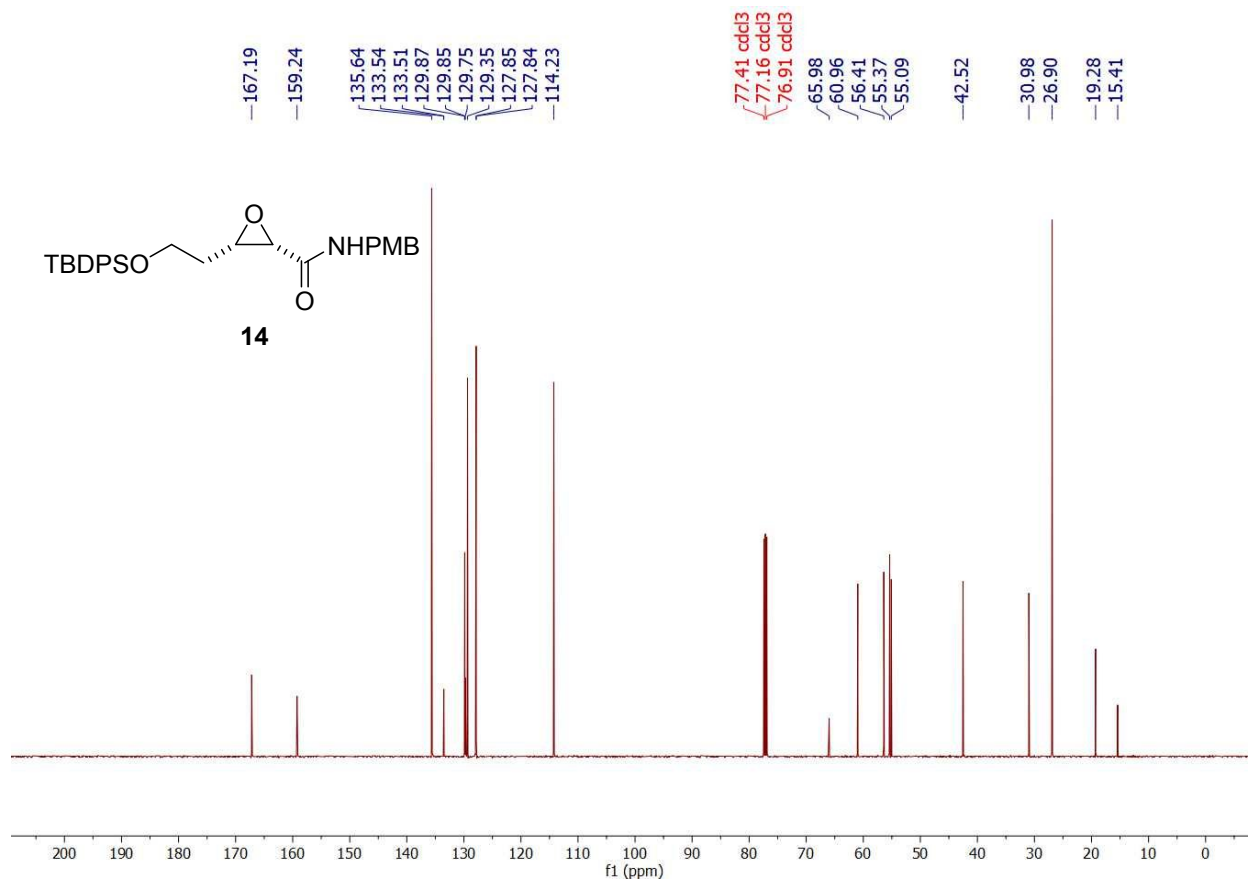

(2*S*,3*S*)-**24a**-<sup>1</sup>H-NMR (500 MHz -CDCl<sub>3</sub>); <sup>13</sup>C{<sup>1</sup>H} (126 MHz, CDCl<sub>3</sub>)

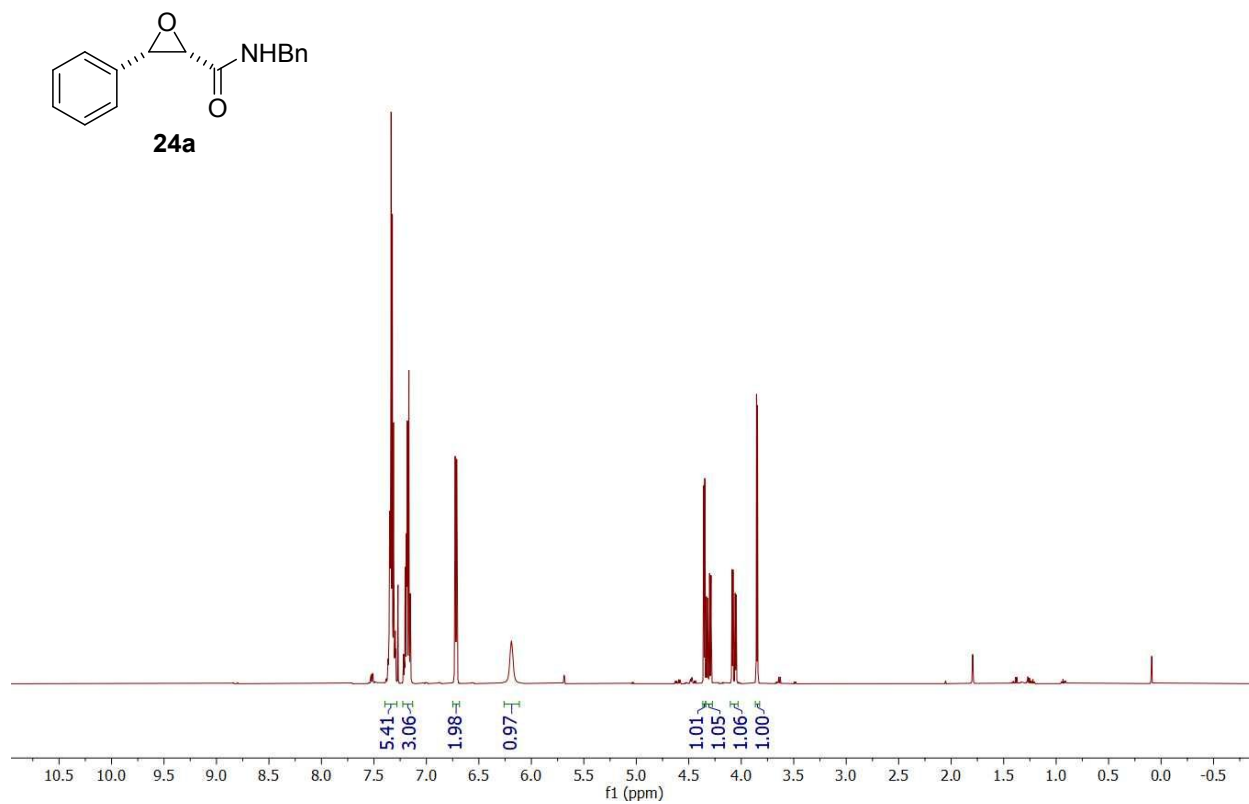

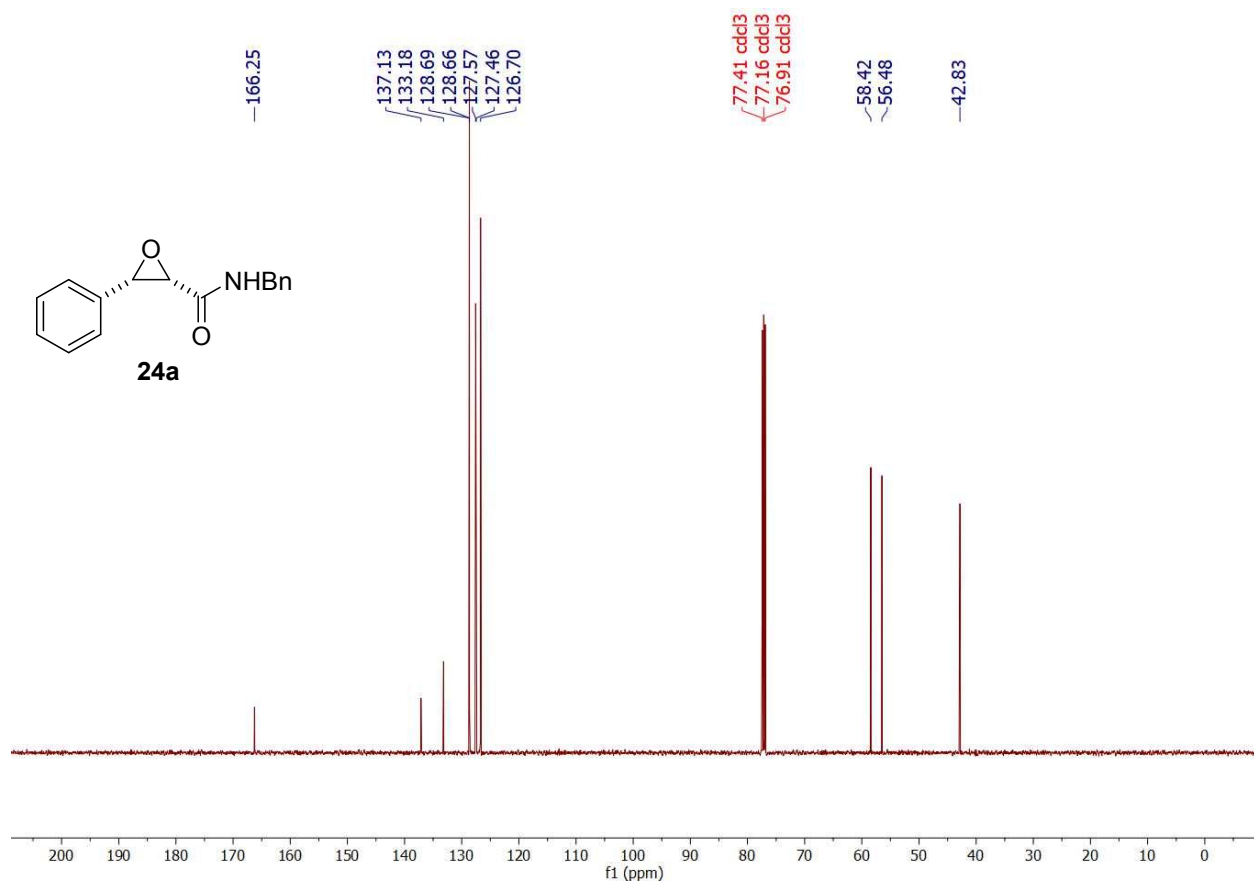



(2*S*,3*S*)-**24a**-<sup>1</sup>H-NMR (500 MHz -CDCl<sub>3</sub>); <sup>13</sup>C{<sup>1</sup>H} (126 MHz, CDCl<sub>3</sub>)

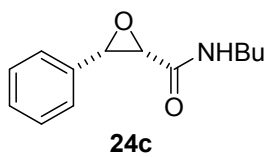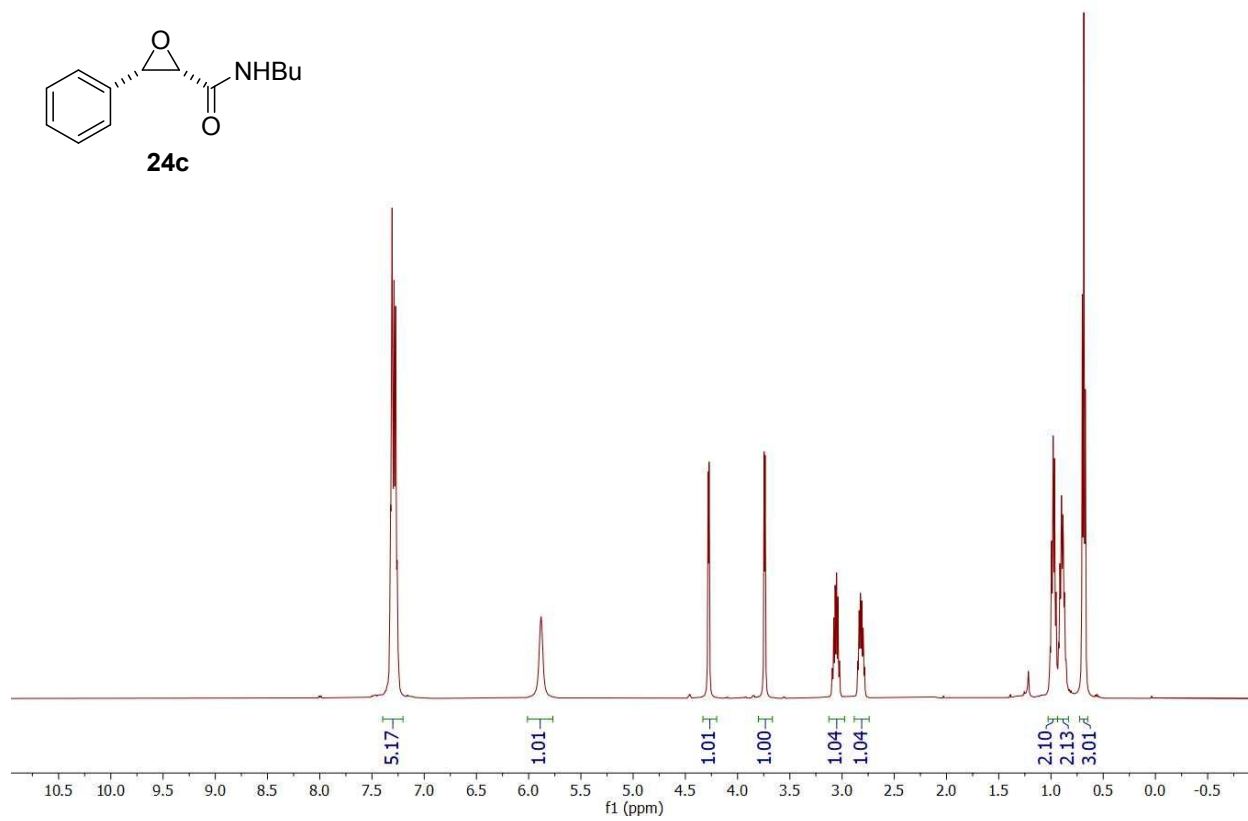

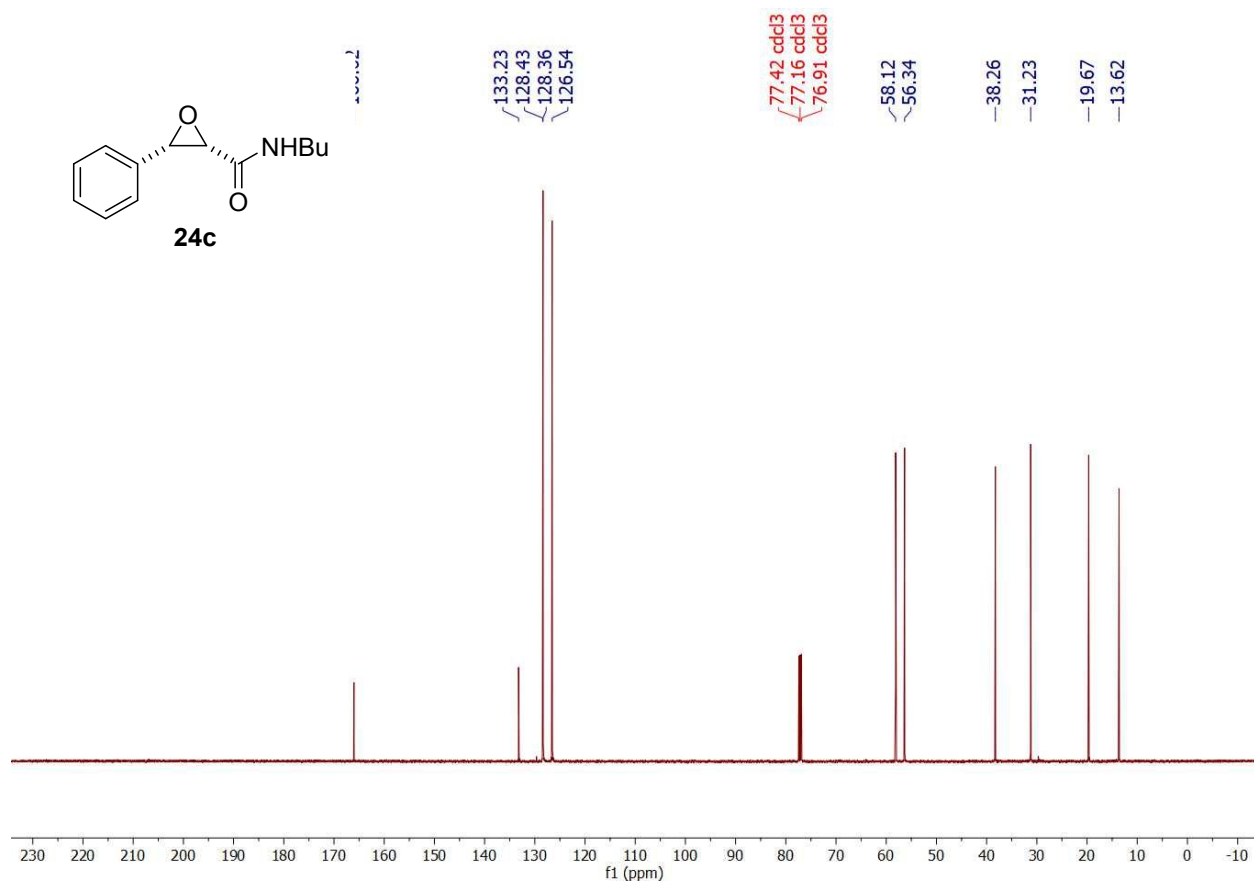

(2*S*,3*S*)-**25a**-<sup>1</sup>H-NMR (500 MHz -CDCl<sub>3</sub>); <sup>13</sup>C{<sup>1</sup>H} (126 MHz, CDCl<sub>3</sub>)

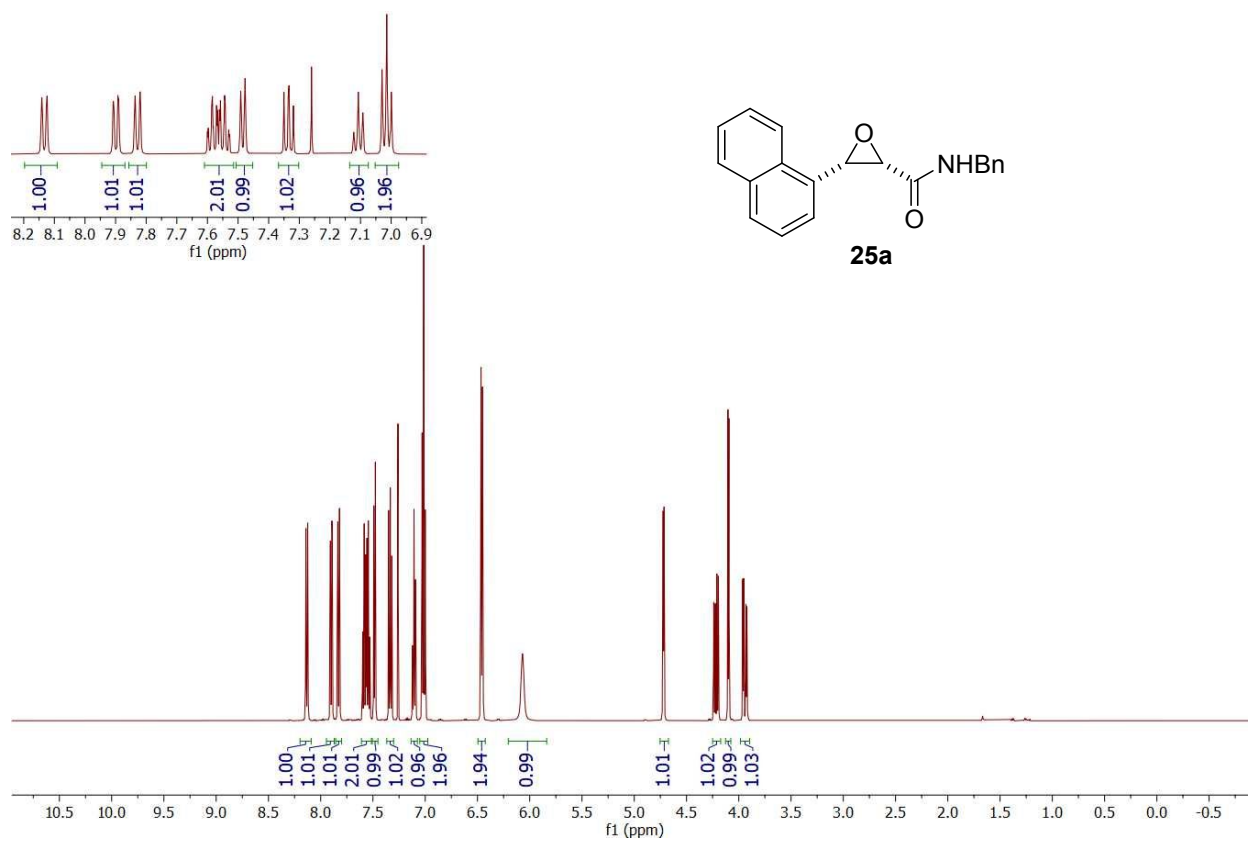

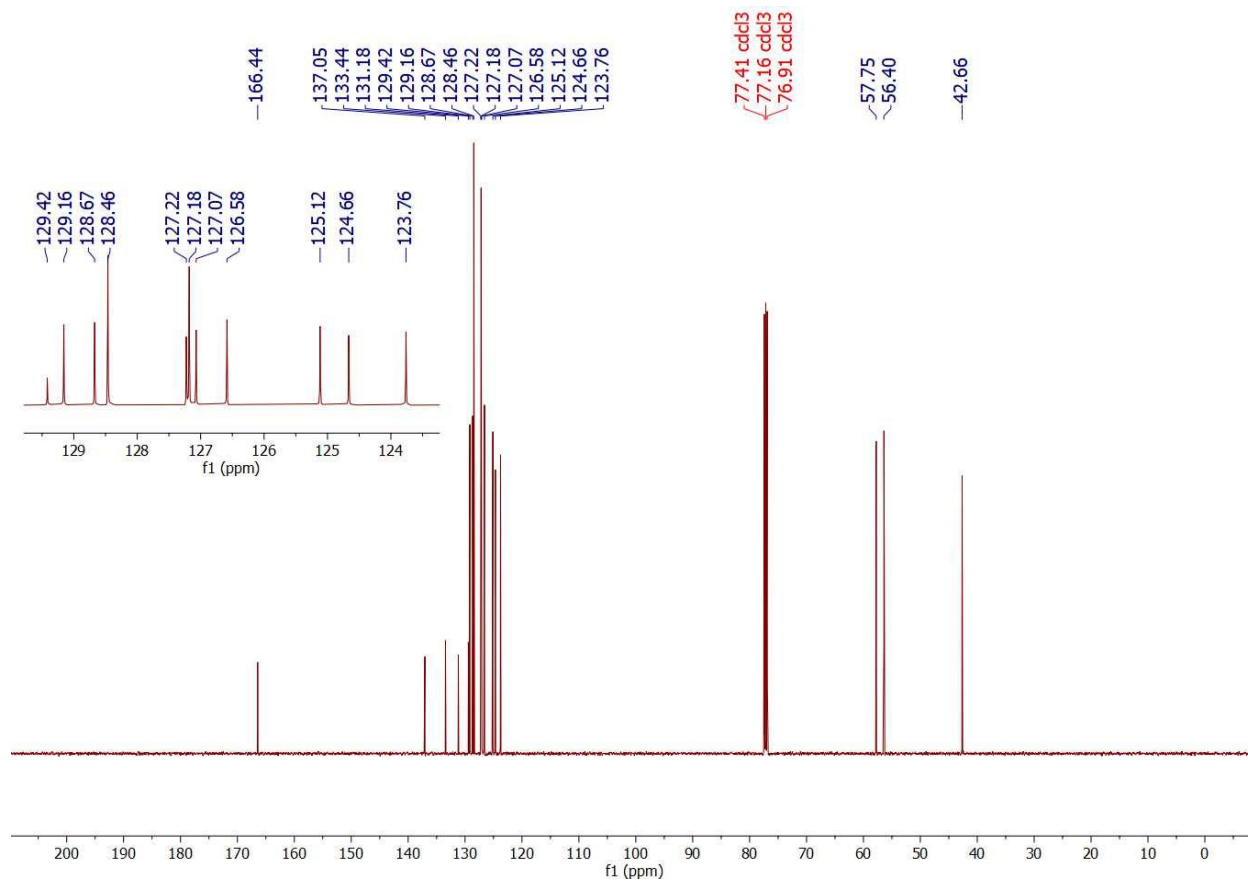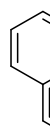

(2*S*,3*S*)-**26a**-<sup>1</sup>H-NMR (500 MHz -CDCl<sub>3</sub>); <sup>13</sup>C{<sup>1</sup>H} (126 MHz, CDCl<sub>3</sub>)

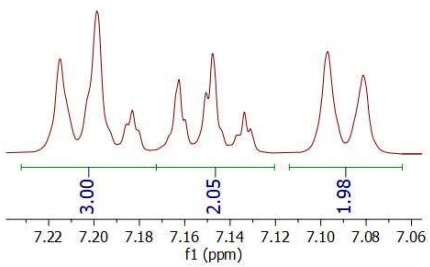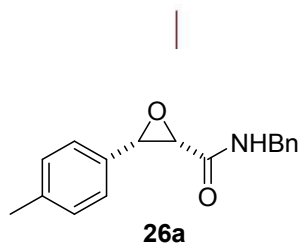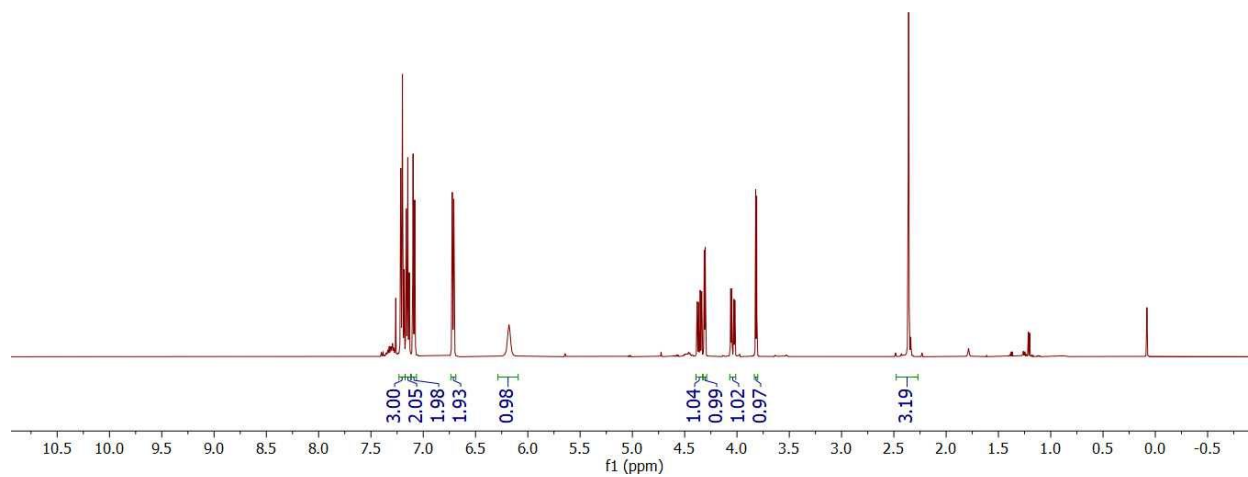

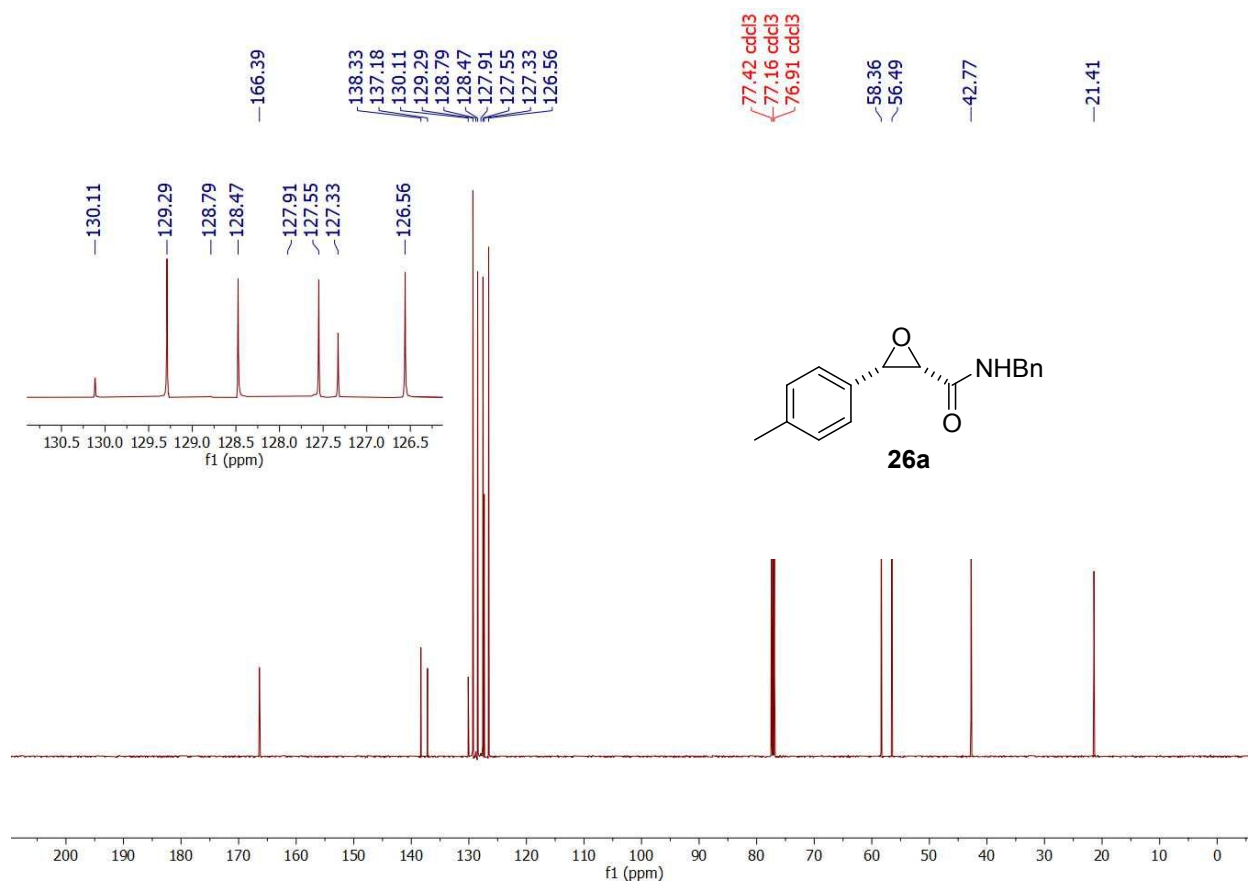

(2*S*,3*S*)-**26c**-<sup>1</sup>H-NMR (500 MHz -CDCl<sub>3</sub>); <sup>13</sup>C{<sup>1</sup>H} (126 MHz, CDCl<sub>3</sub>)

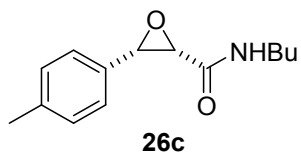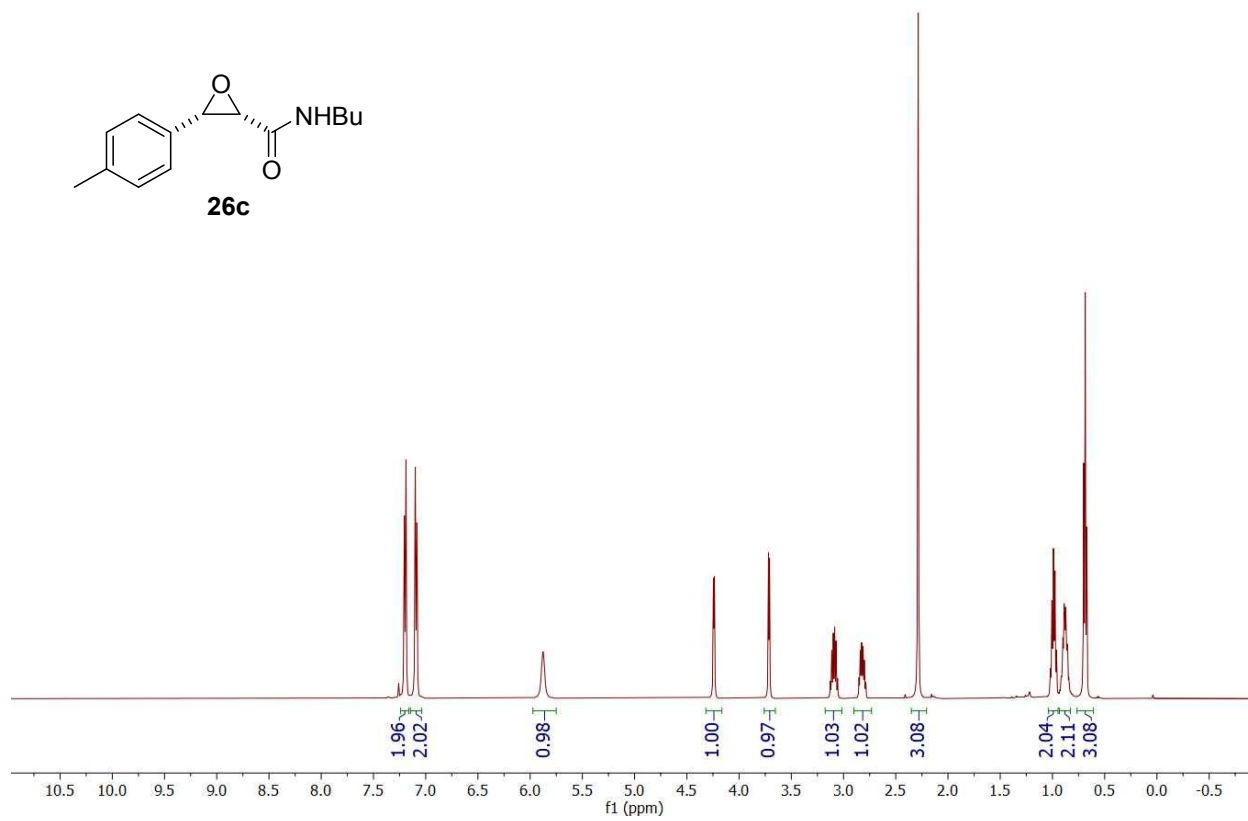

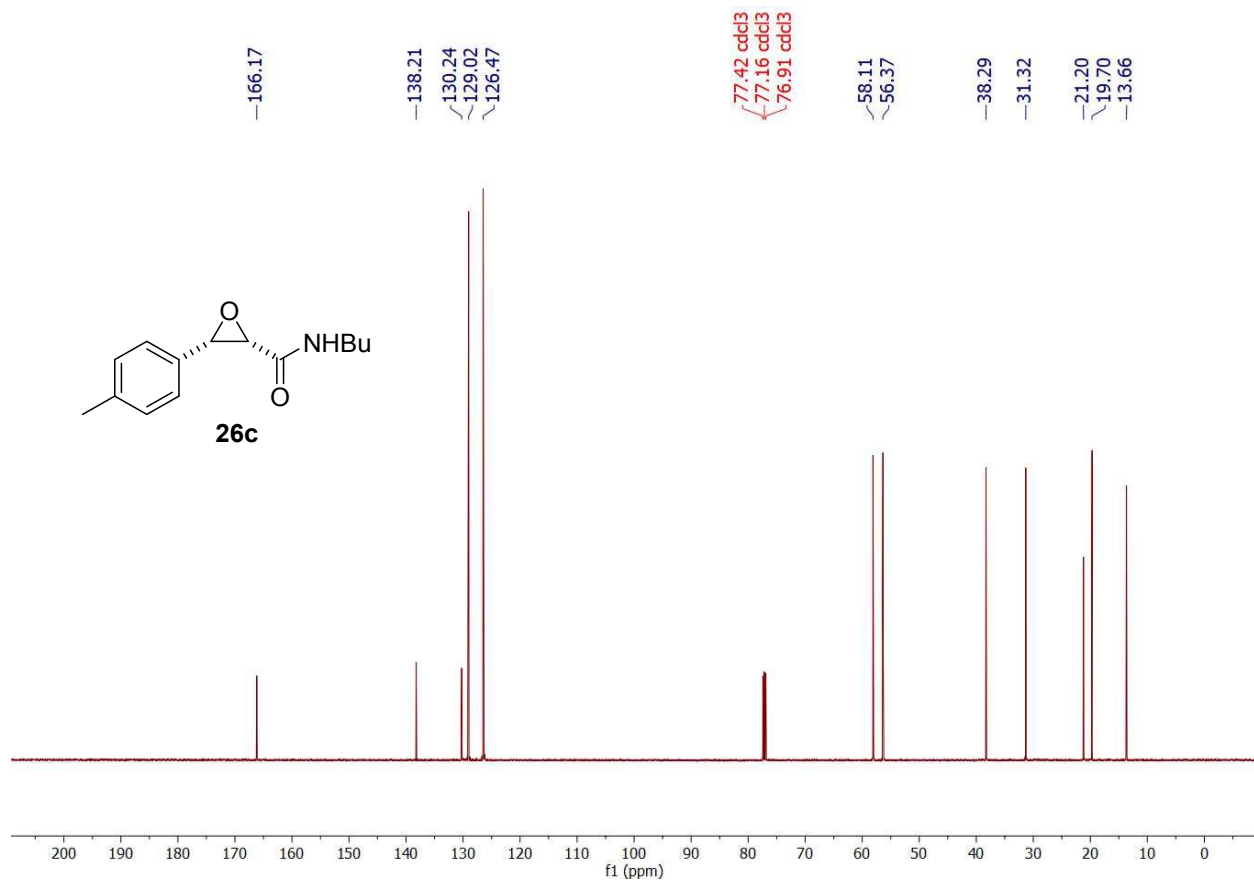



(2*S*,3*S*)-**28a**-<sup>1</sup>H-NMR (500 MHz -CDCl<sub>3</sub>); <sup>13</sup>C{<sup>1</sup>H} (126 MHz, CDCl<sub>3</sub>)

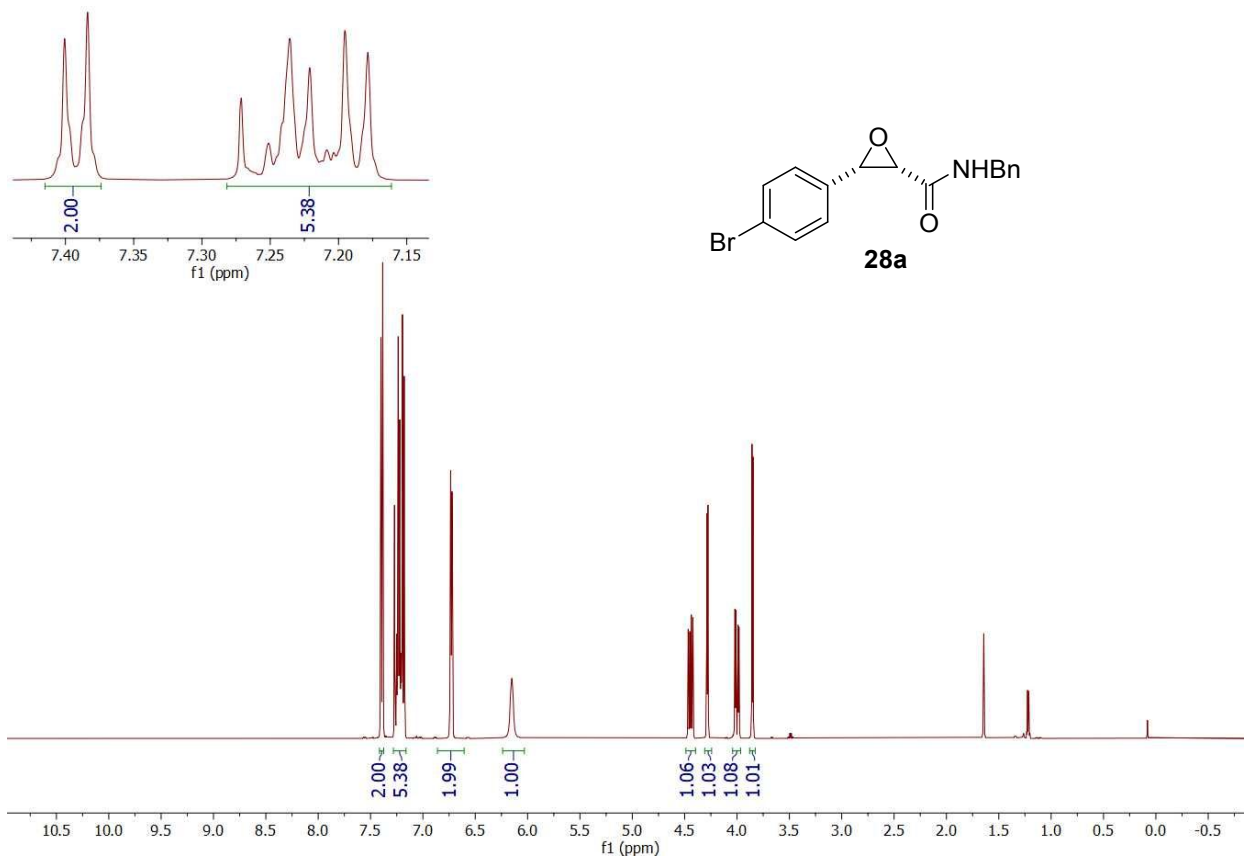

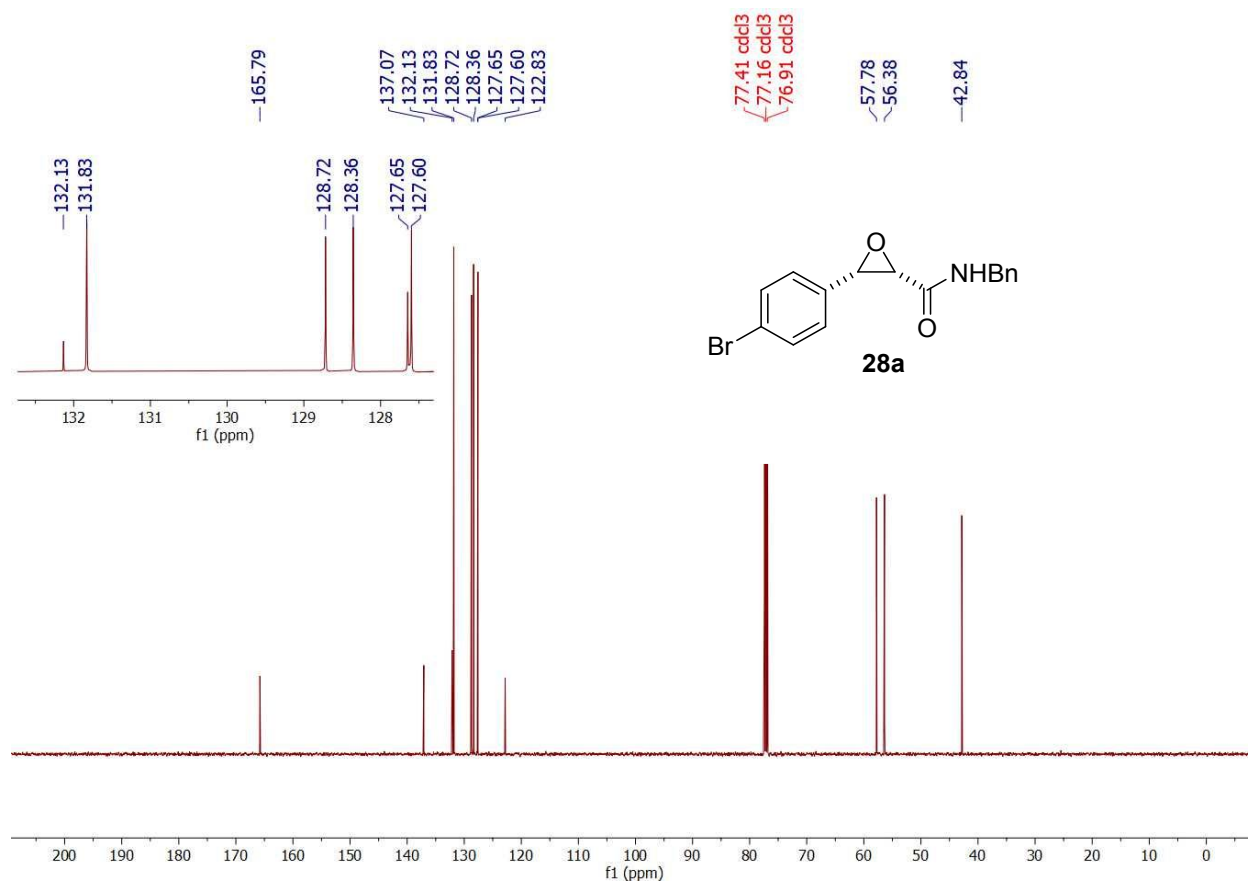

(2*S*,3*S*)-**28c**-<sup>1</sup>H-NMR (500 MHz -CDCl<sub>3</sub>); <sup>13</sup>C{<sup>1</sup>H} (126 MHz, CDCl<sub>3</sub>)

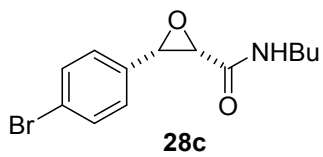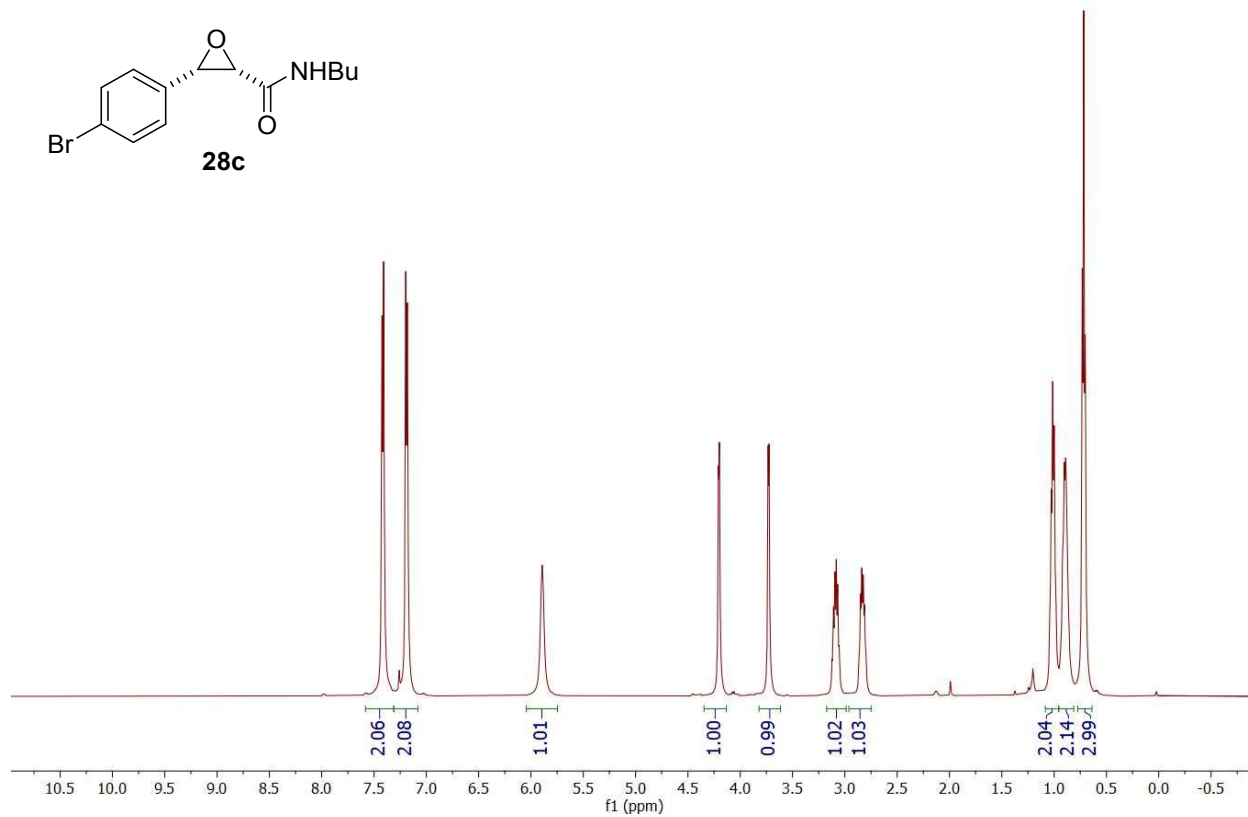

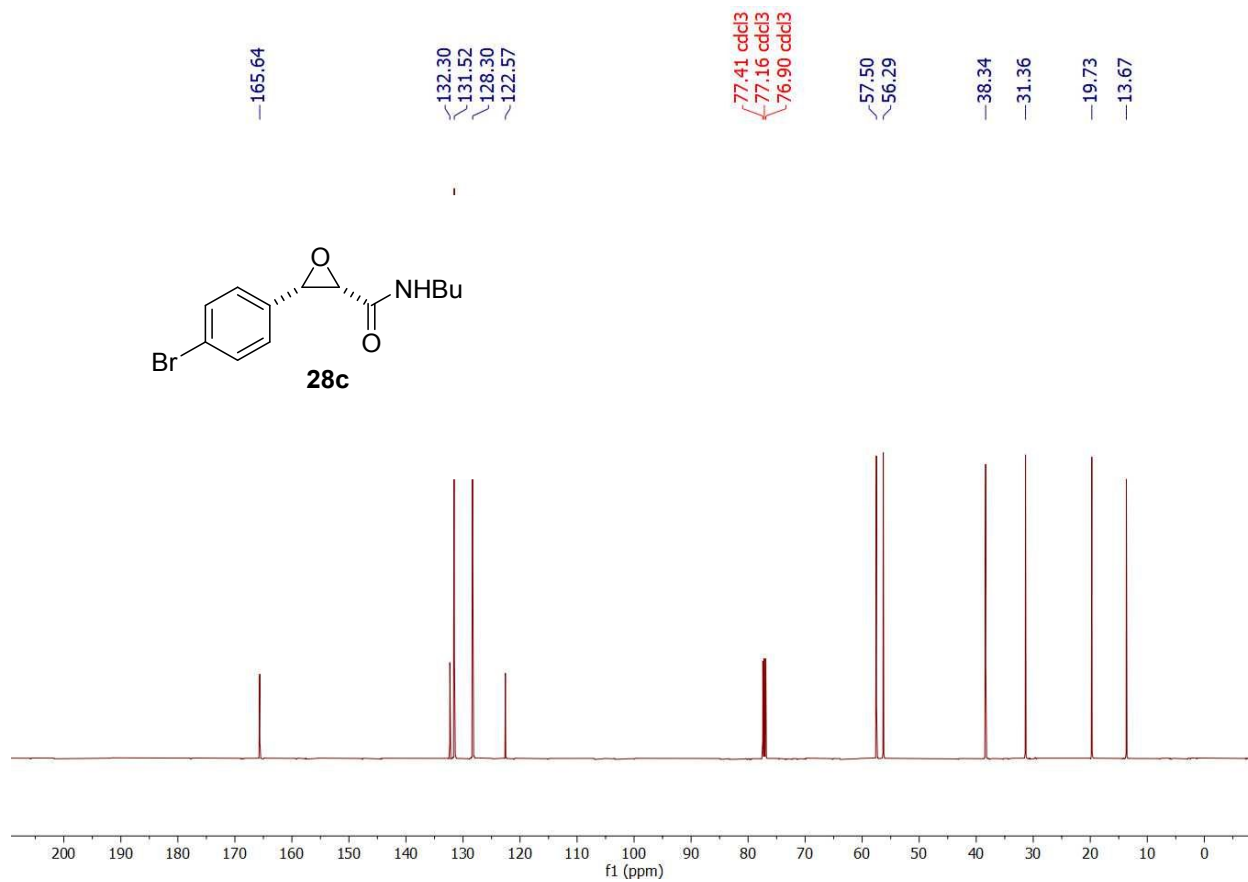

(2*S*,3*S*)-**29a**-<sup>1</sup>H-NMR (500 MHz -CDCl<sub>3</sub>); <sup>13</sup>C{<sup>1</sup>H} (126 MHz, CDCl<sub>3</sub>)

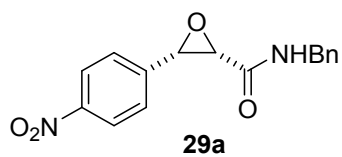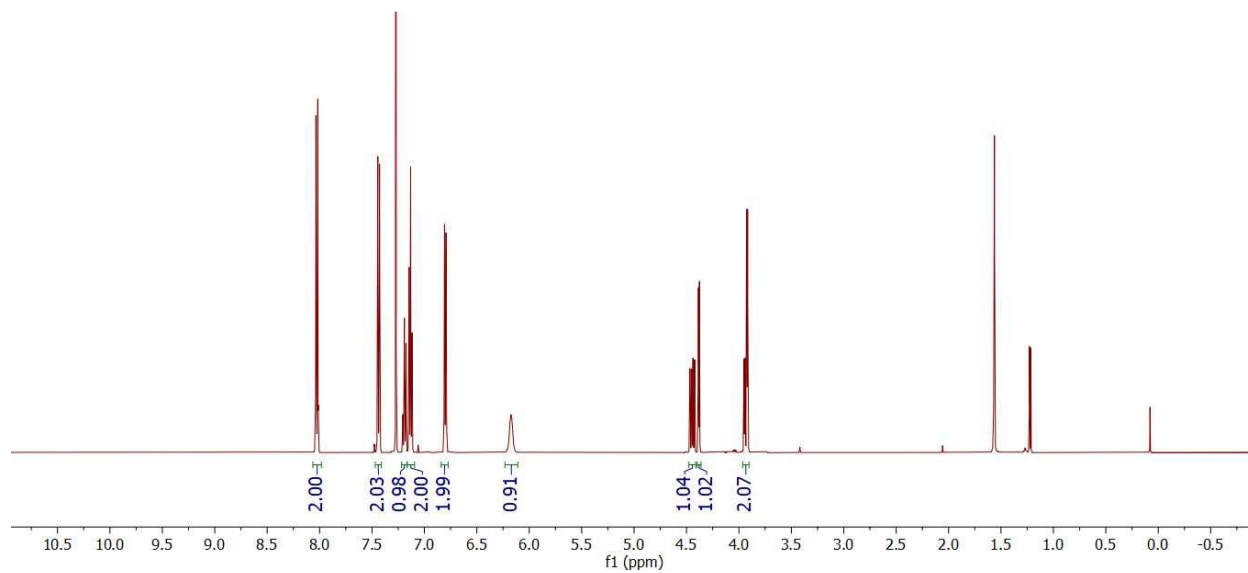

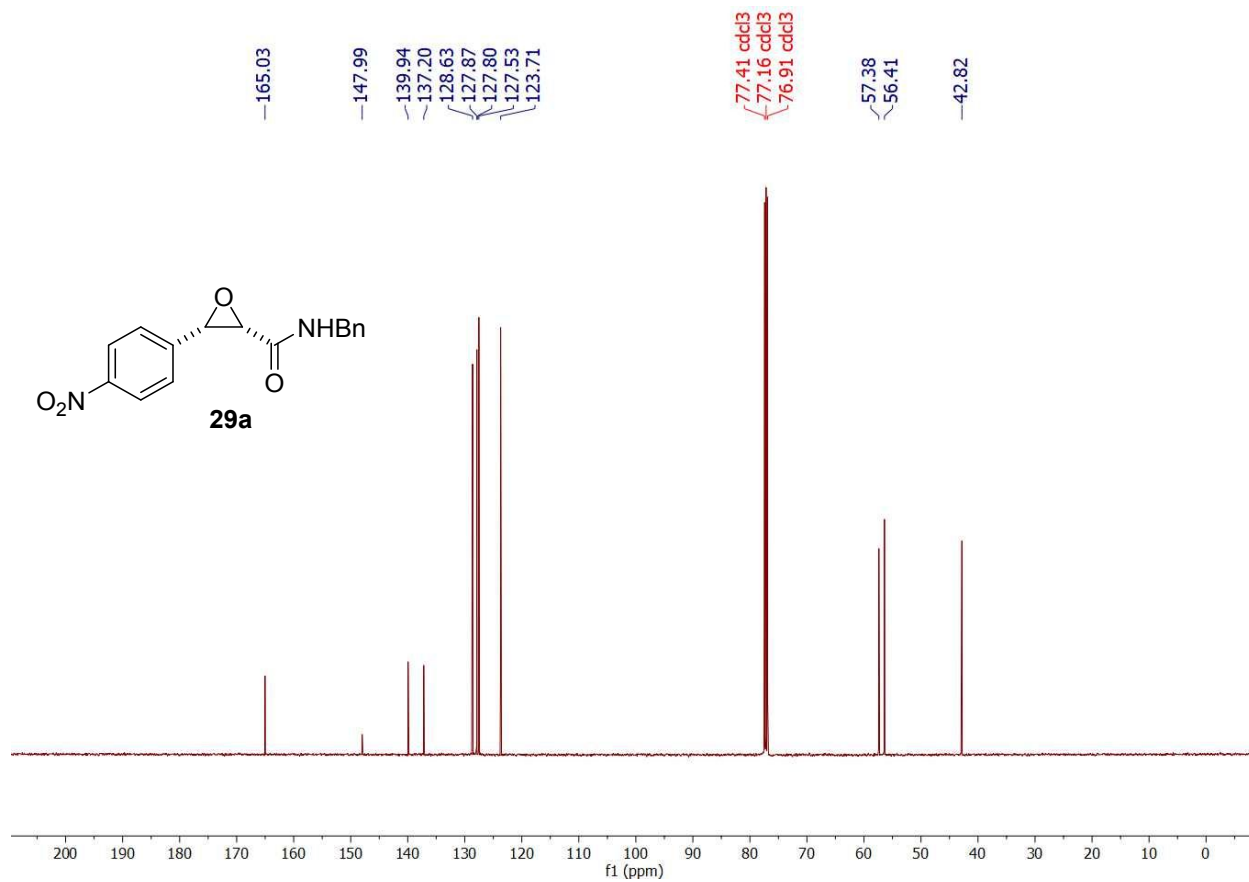

(2*S*,3*S*)-**29c**-<sup>1</sup>H-NMR (500 MHz -CDCl<sub>3</sub>); <sup>13</sup>C{<sup>1</sup>H} (126 MHz, CDCl<sub>3</sub>)

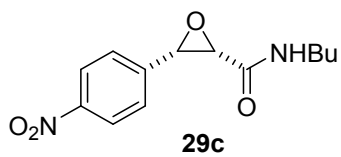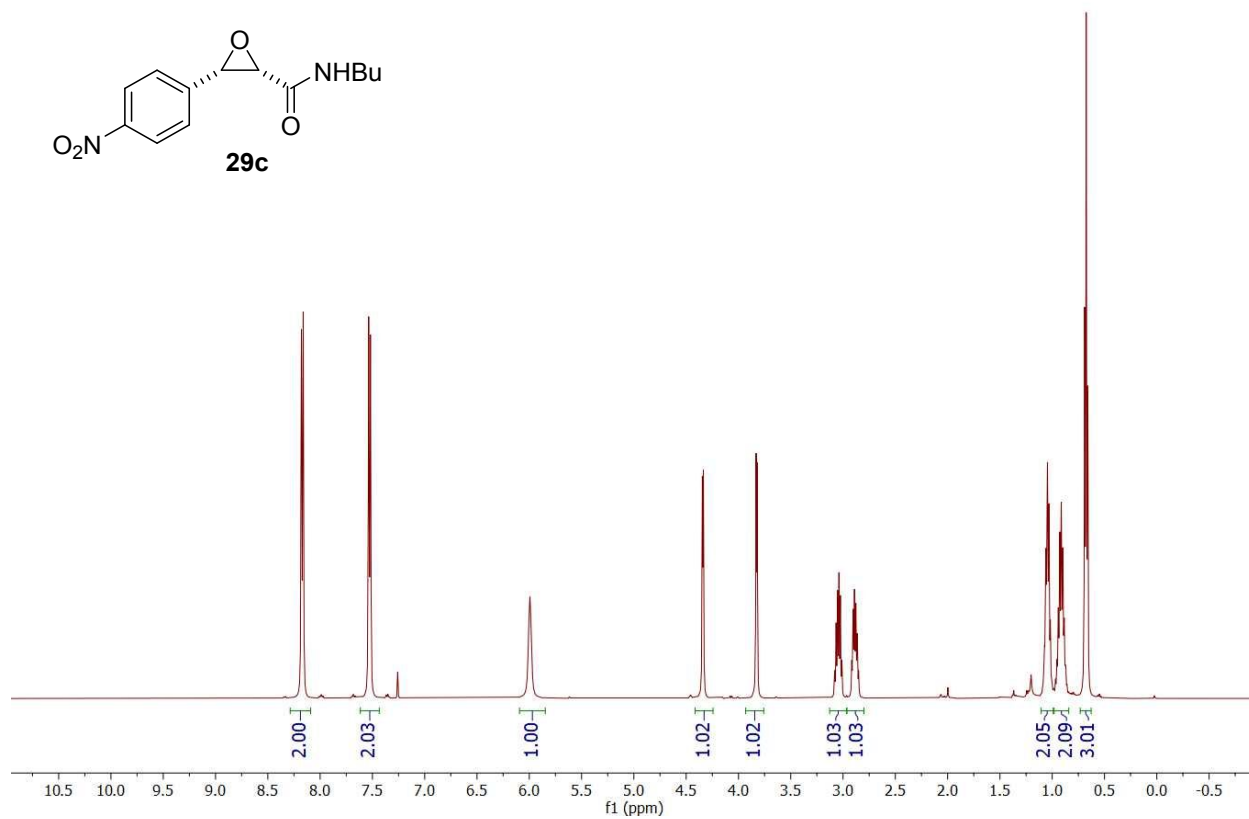

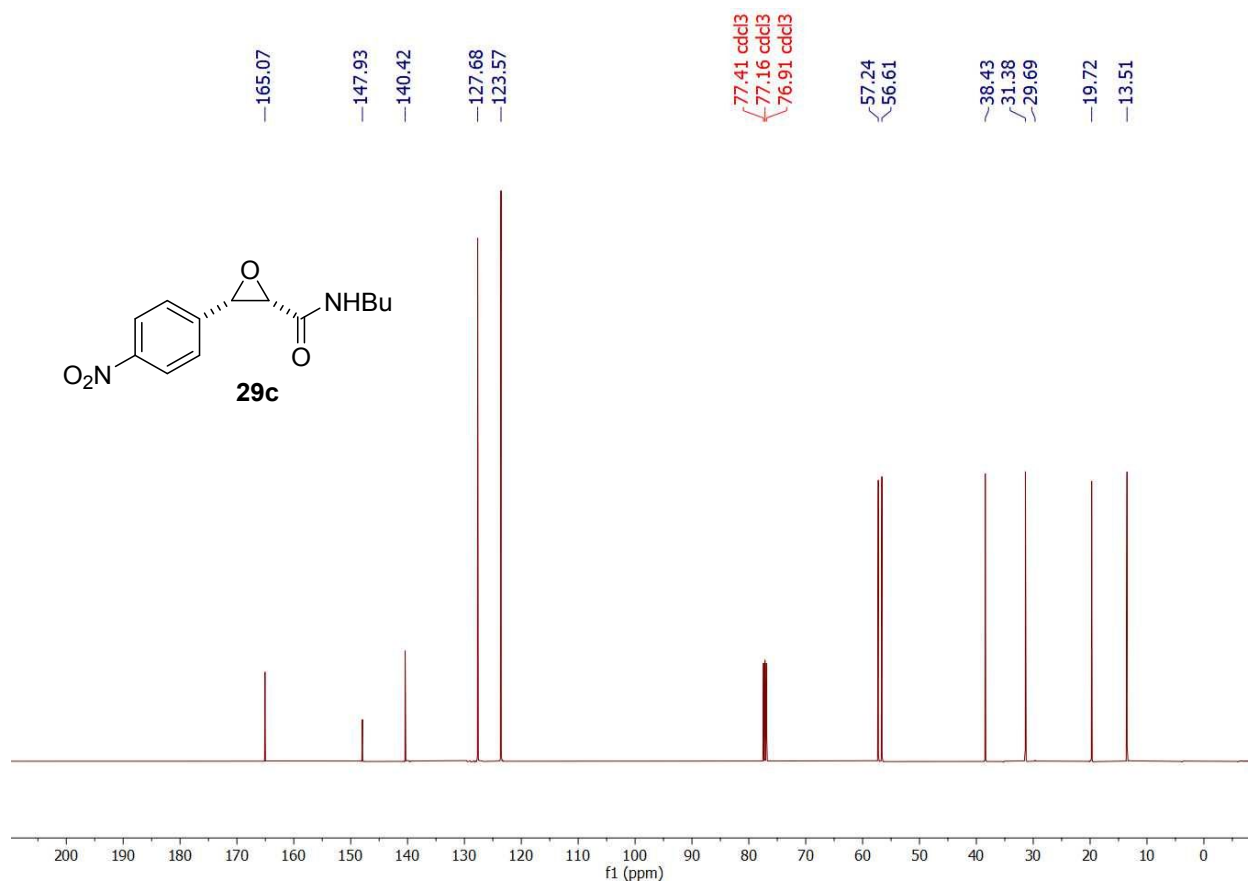



(2*S*,3*S*)-**36a**-<sup>1</sup>H-NMR (500 MHz -CDCl<sub>3</sub>); <sup>13</sup>C{<sup>1</sup>H} (126 MHz, CDCl<sub>3</sub>)

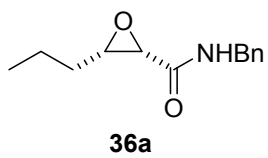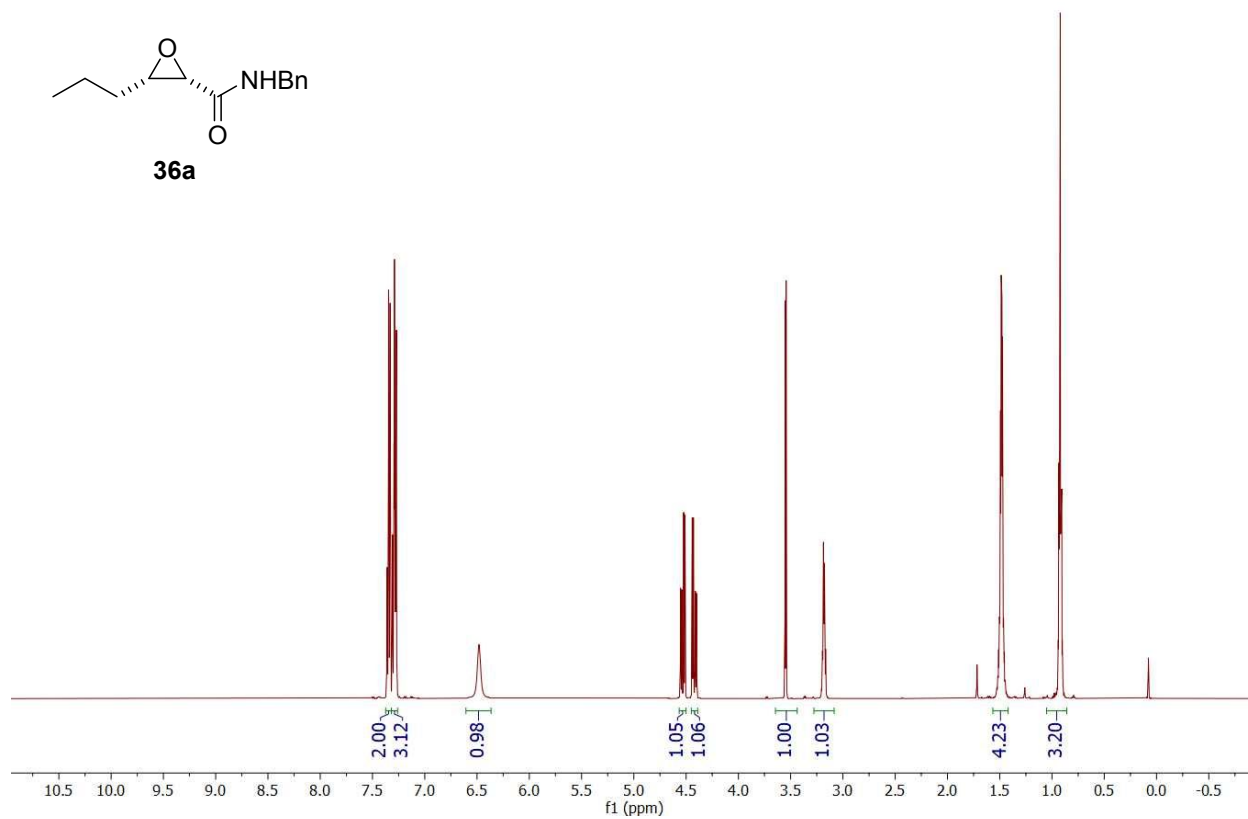

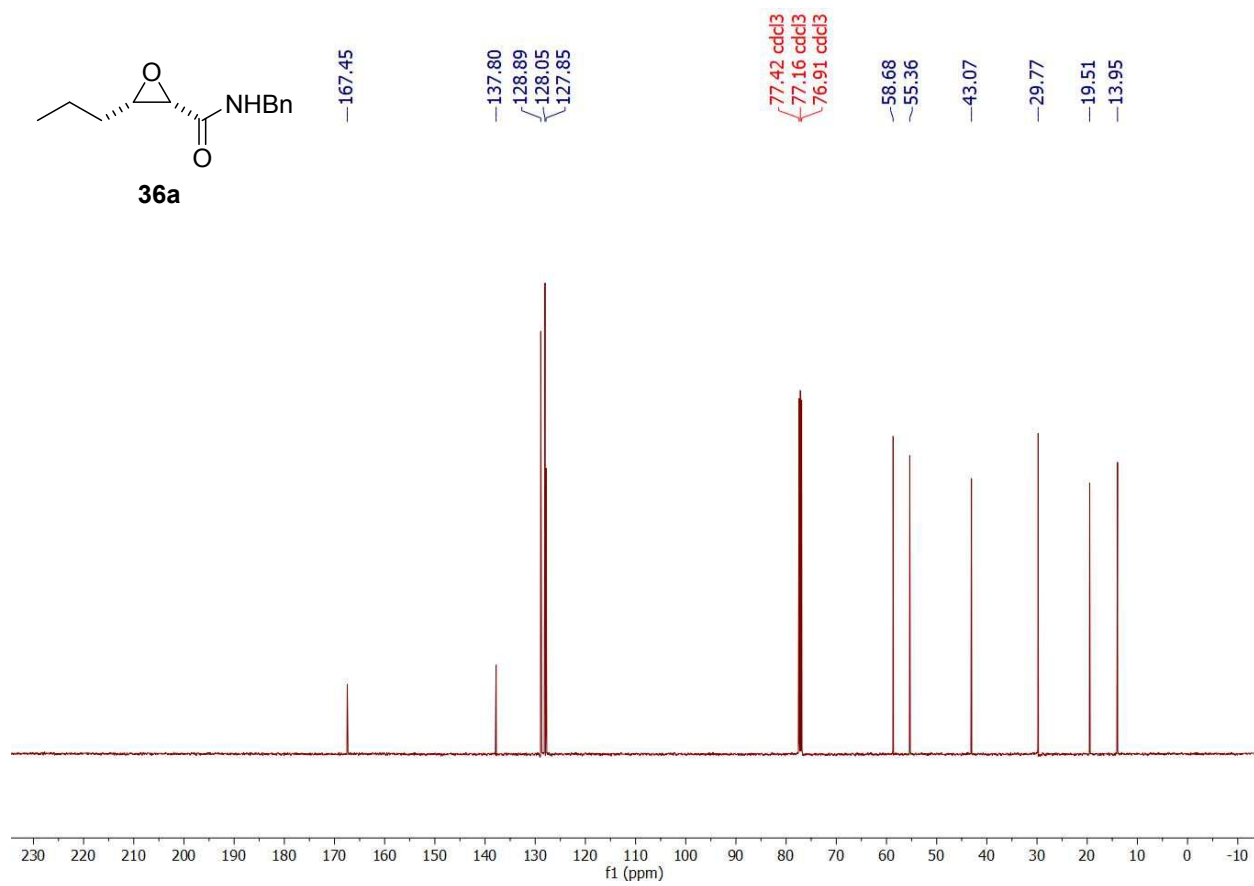

(2*S*,3*S*)-**36b**-<sup>1</sup>H-NMR (500 MHz -CDCl<sub>3</sub>); <sup>13</sup>C{<sup>1</sup>H} (126 MHz, CDCl<sub>3</sub>)

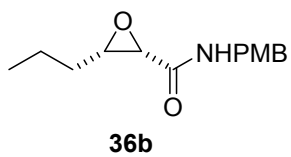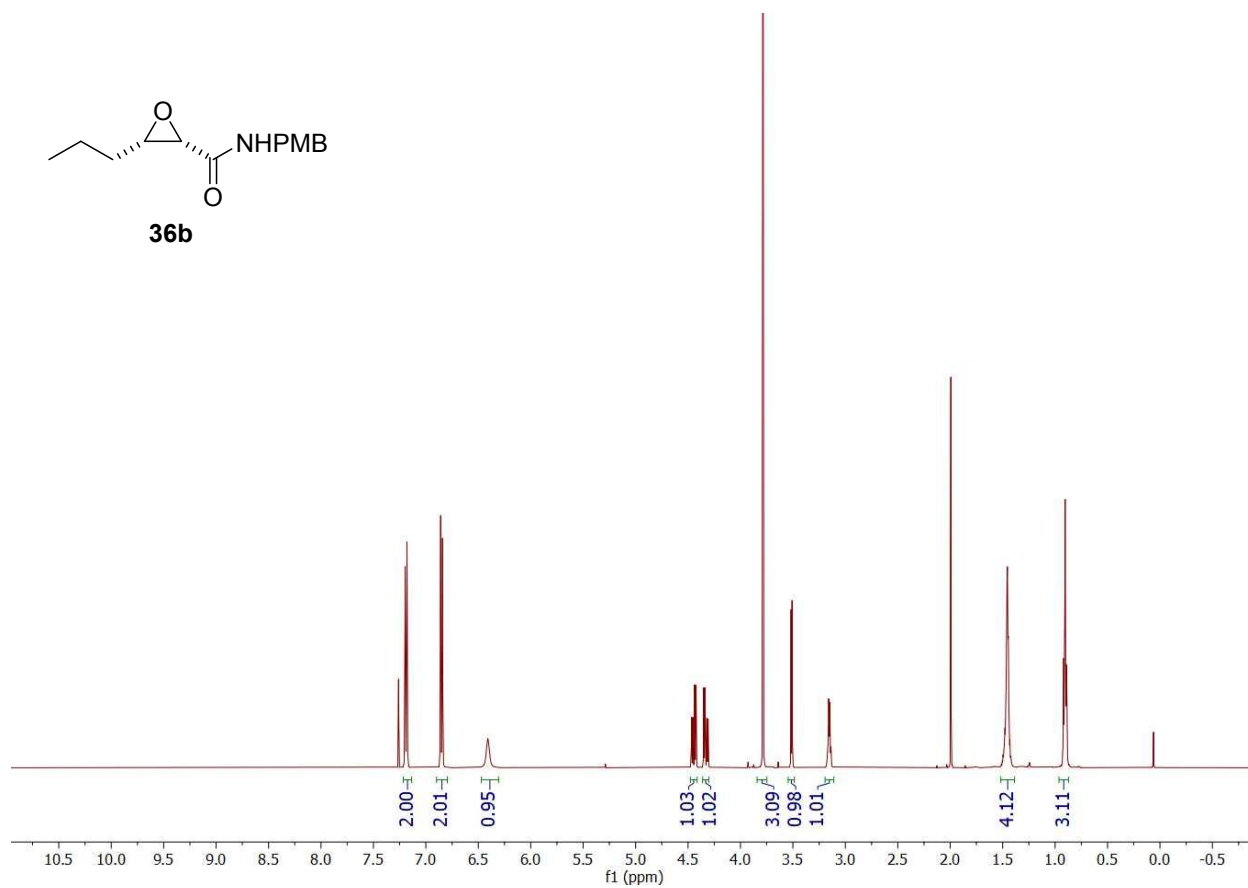

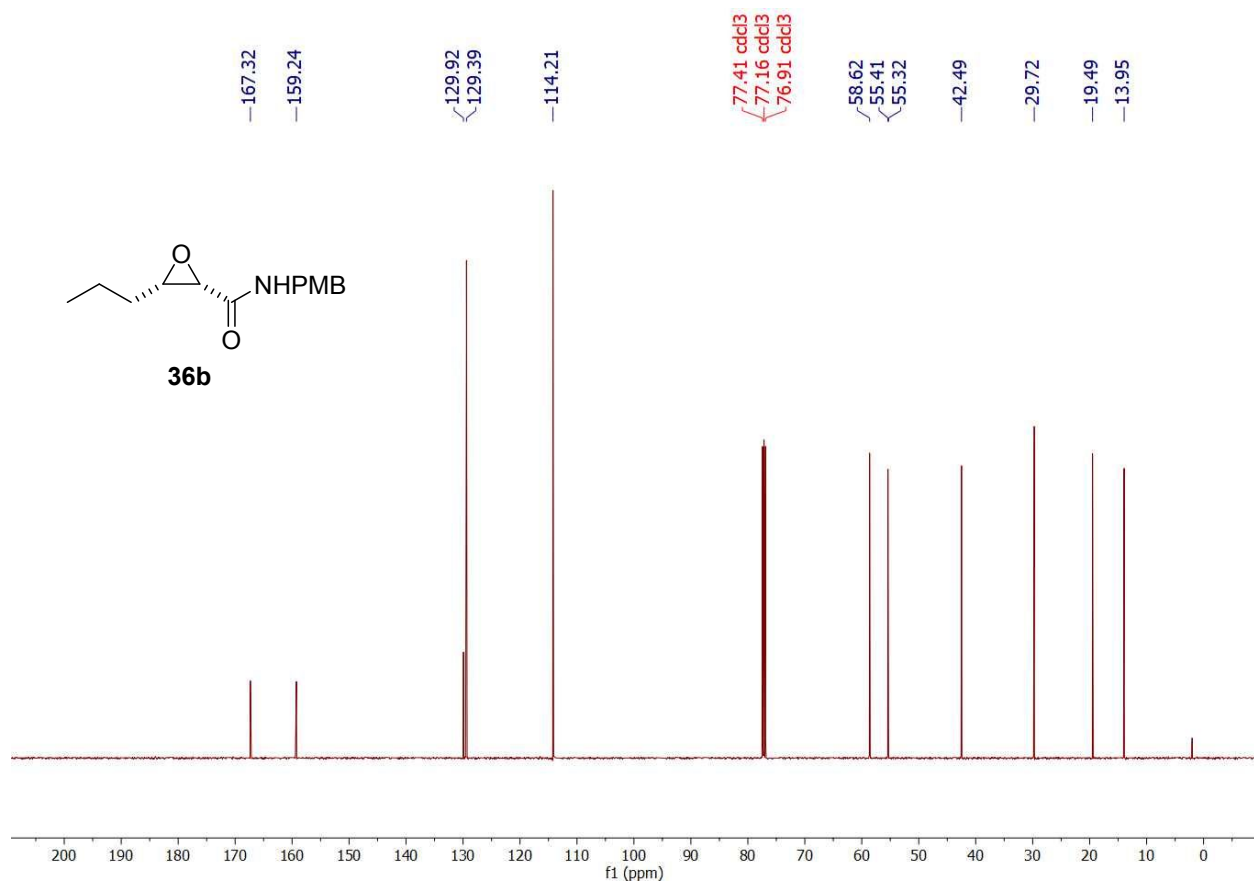

(2*S*,3*S*)-**37a**-<sup>1</sup>H-NMR (500 MHz -CDCl<sub>3</sub>); <sup>13</sup>C{<sup>1</sup>H} (126 MHz, CDCl<sub>3</sub>)

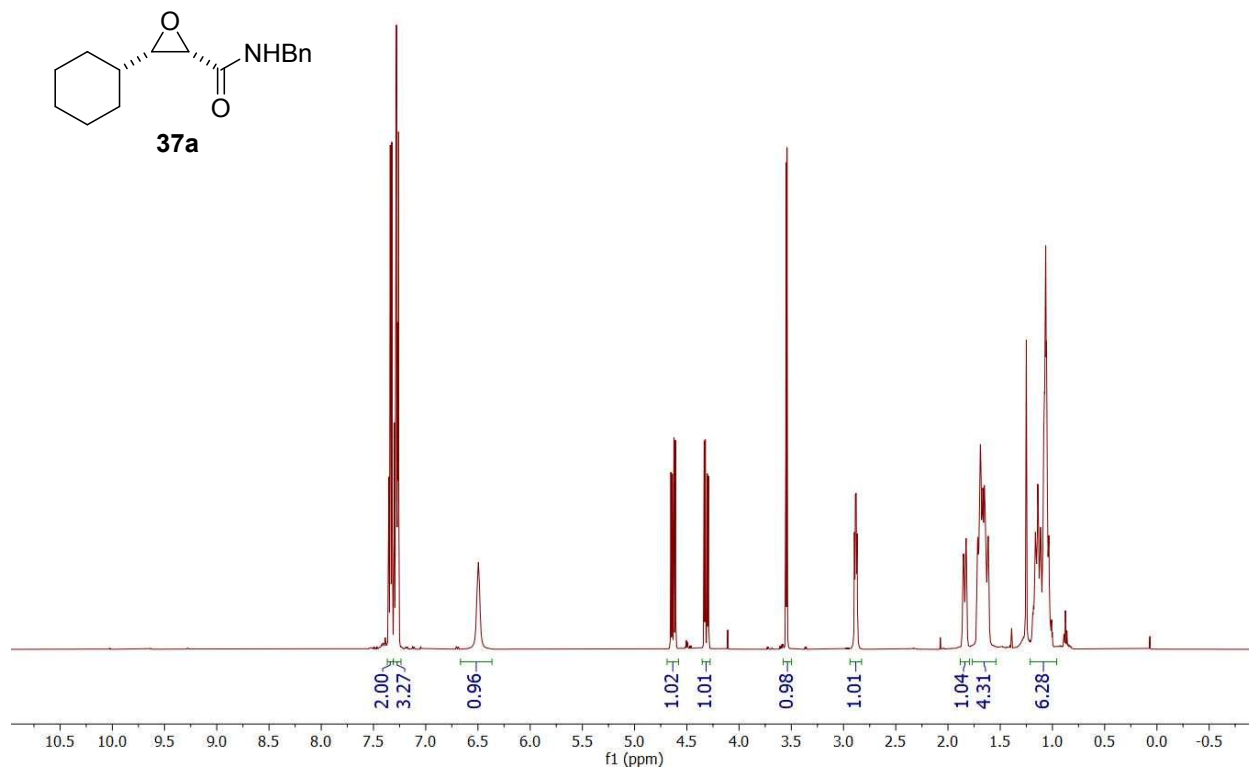

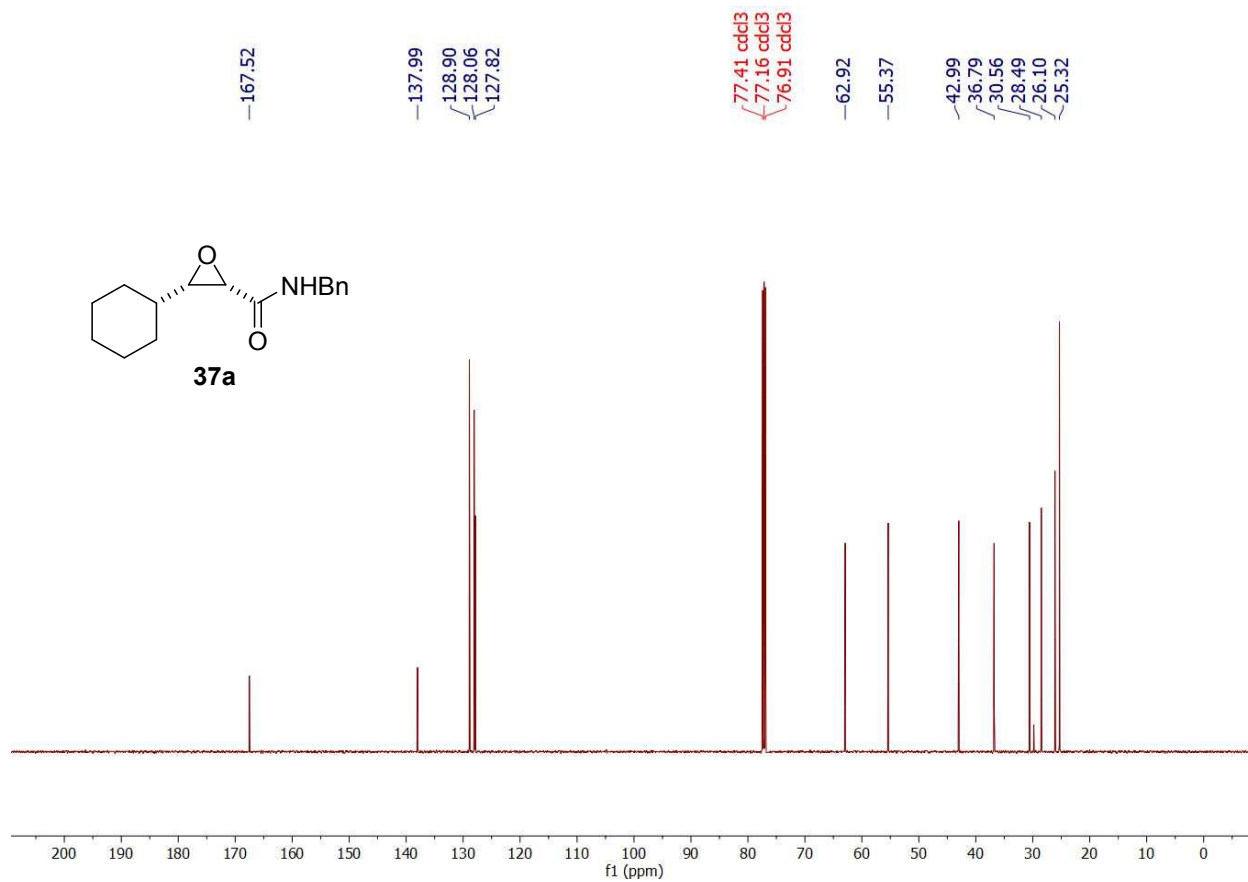

(2*S*,3*S*)-**38a**-<sup>1</sup>H-NMR (500 MHz -CDCl<sub>3</sub>); <sup>13</sup>C{<sup>1</sup>H} (126 MHz, CDCl<sub>3</sub>)

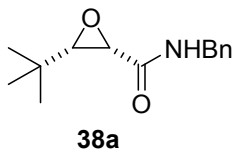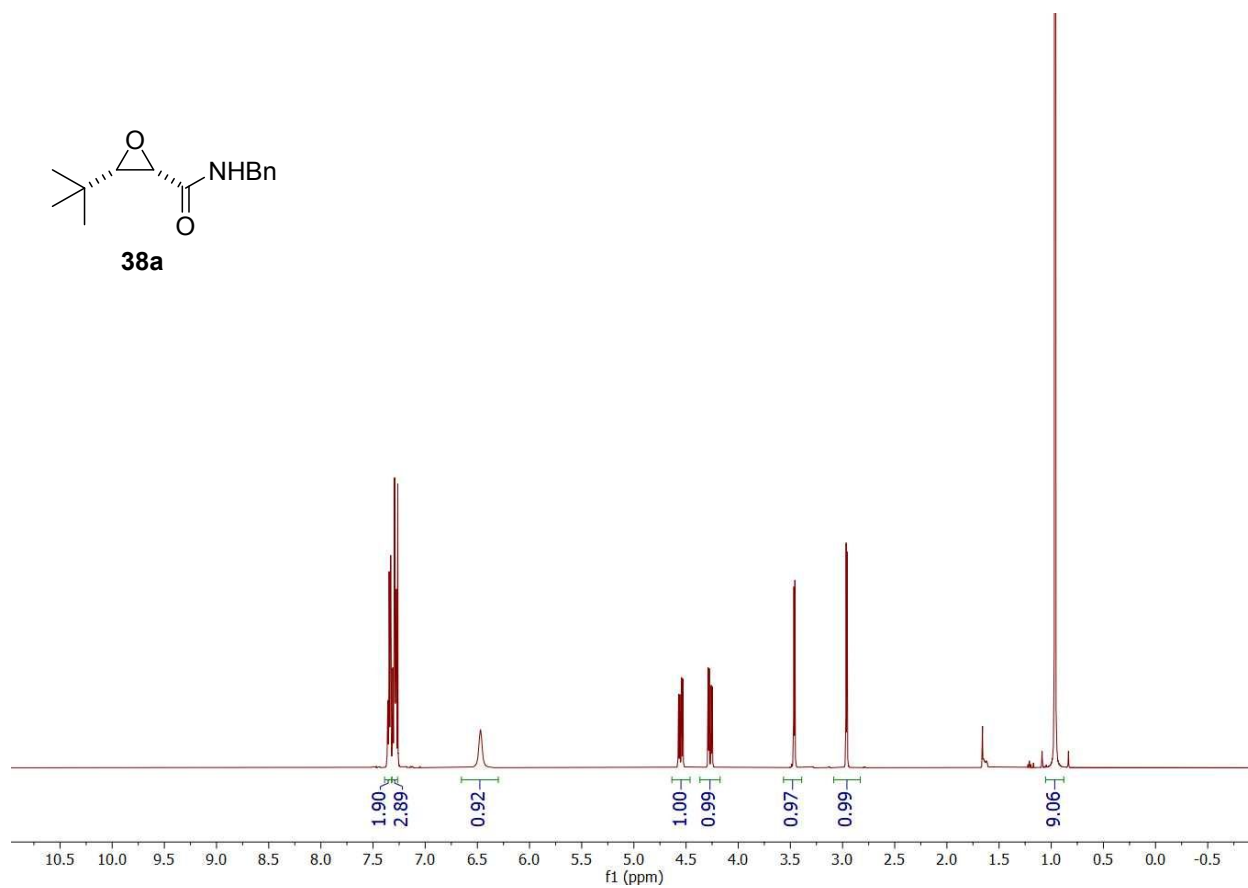

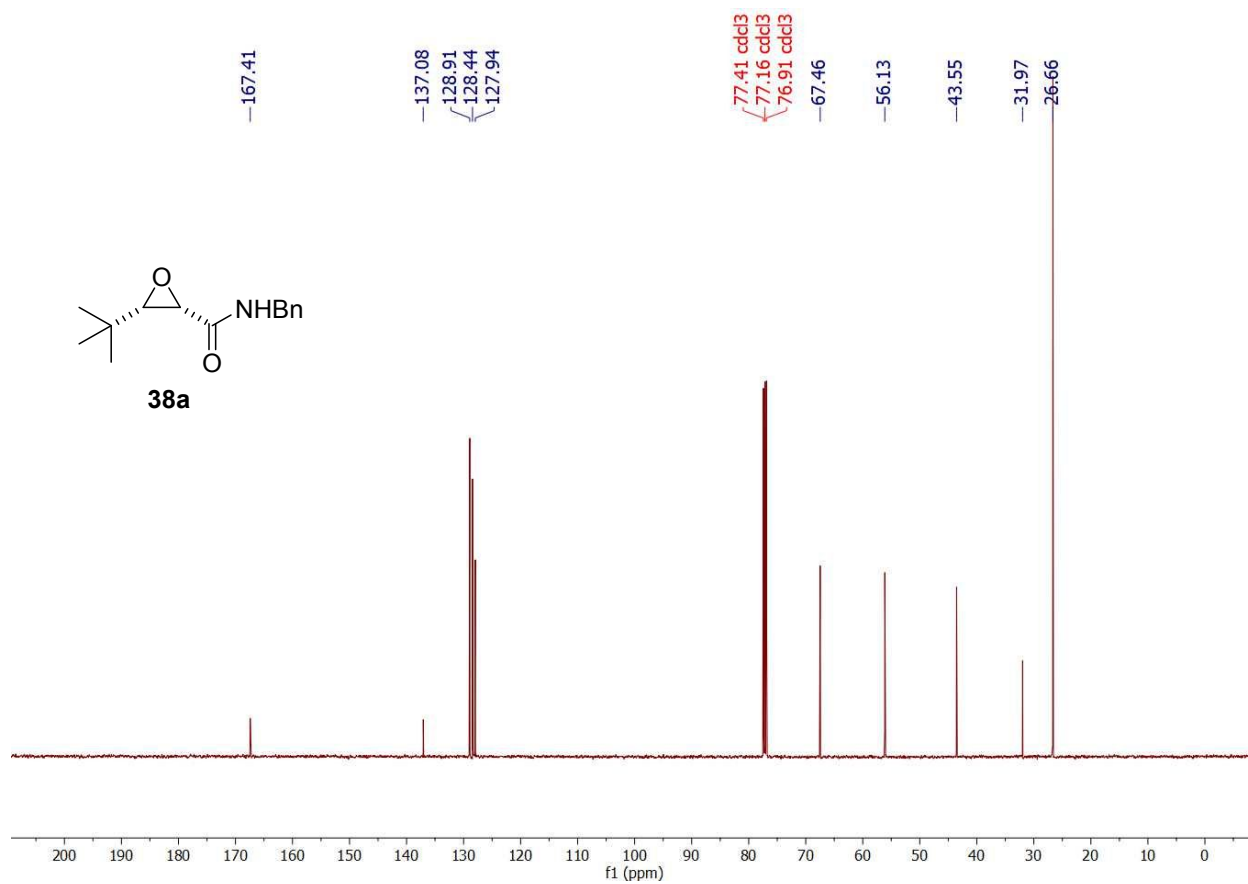



(2*S*,3*S*)-**39a**-<sup>1</sup>H-NMR (500 MHz -CDCl<sub>3</sub>); <sup>13</sup>C{<sup>1</sup>H} (126 MHz, CDCl<sub>3</sub>)

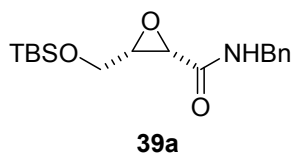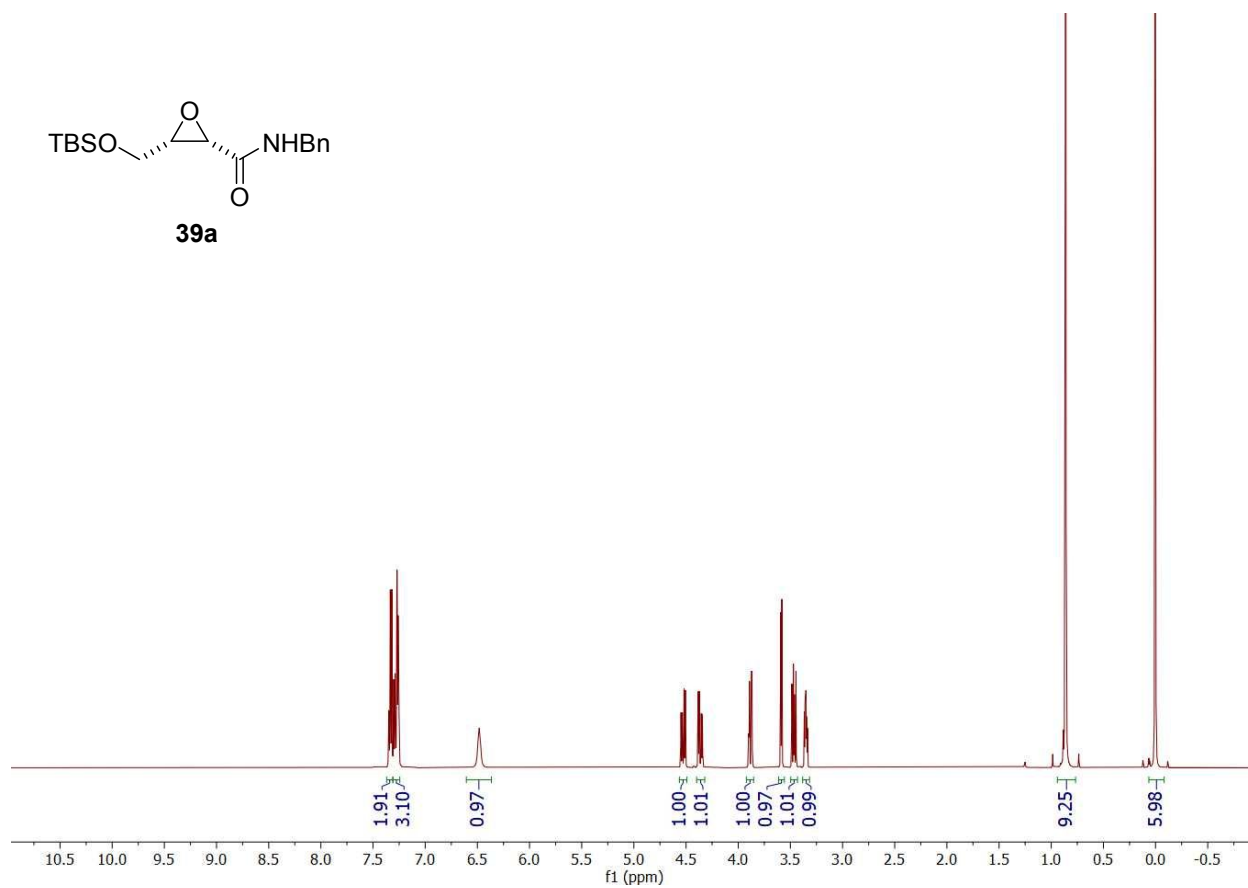

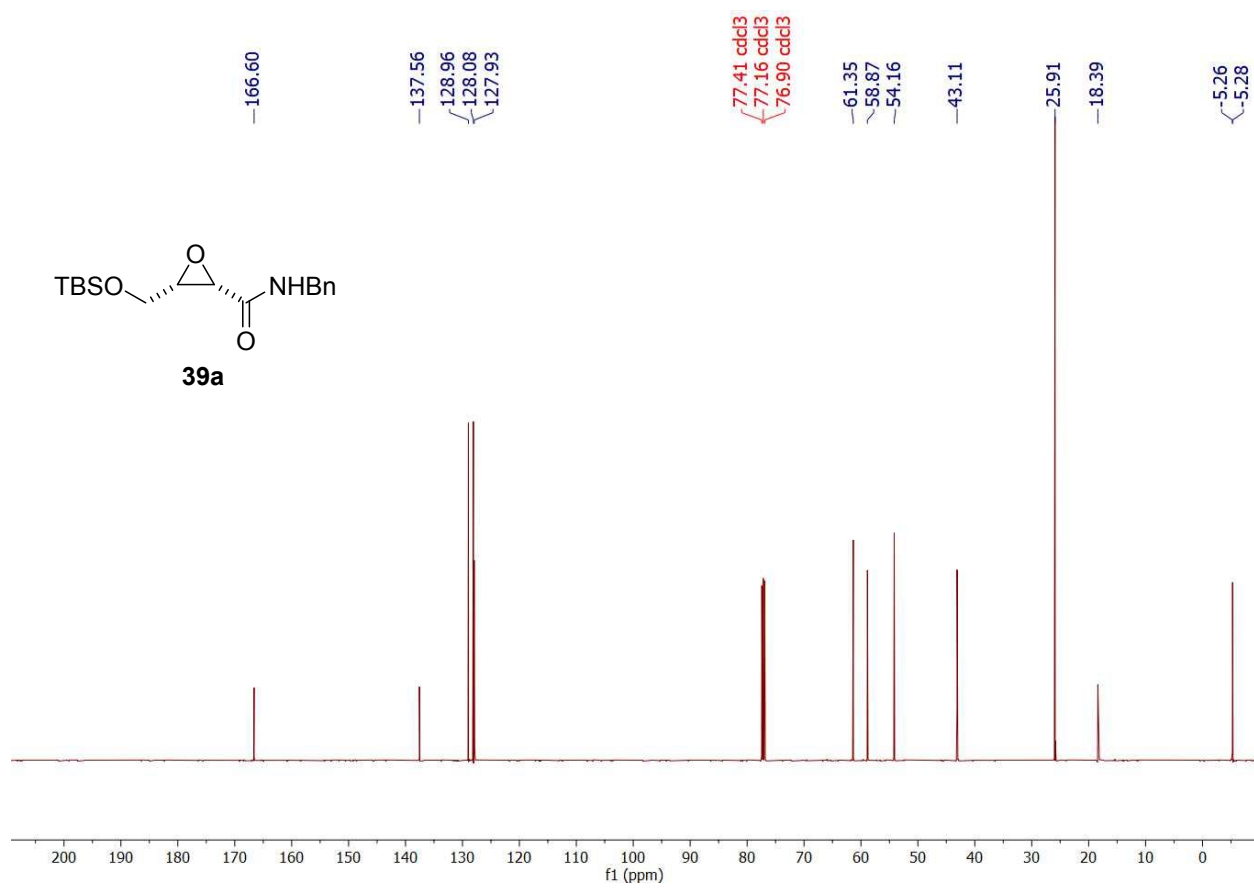

(2*S*,3*S*)-**39b**-<sup>1</sup>H-NMR (500 MHz -CDCl<sub>3</sub>); <sup>13</sup>C{<sup>1</sup>H} (126 MHz, CDCl<sub>3</sub>)

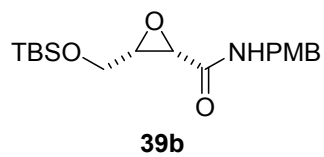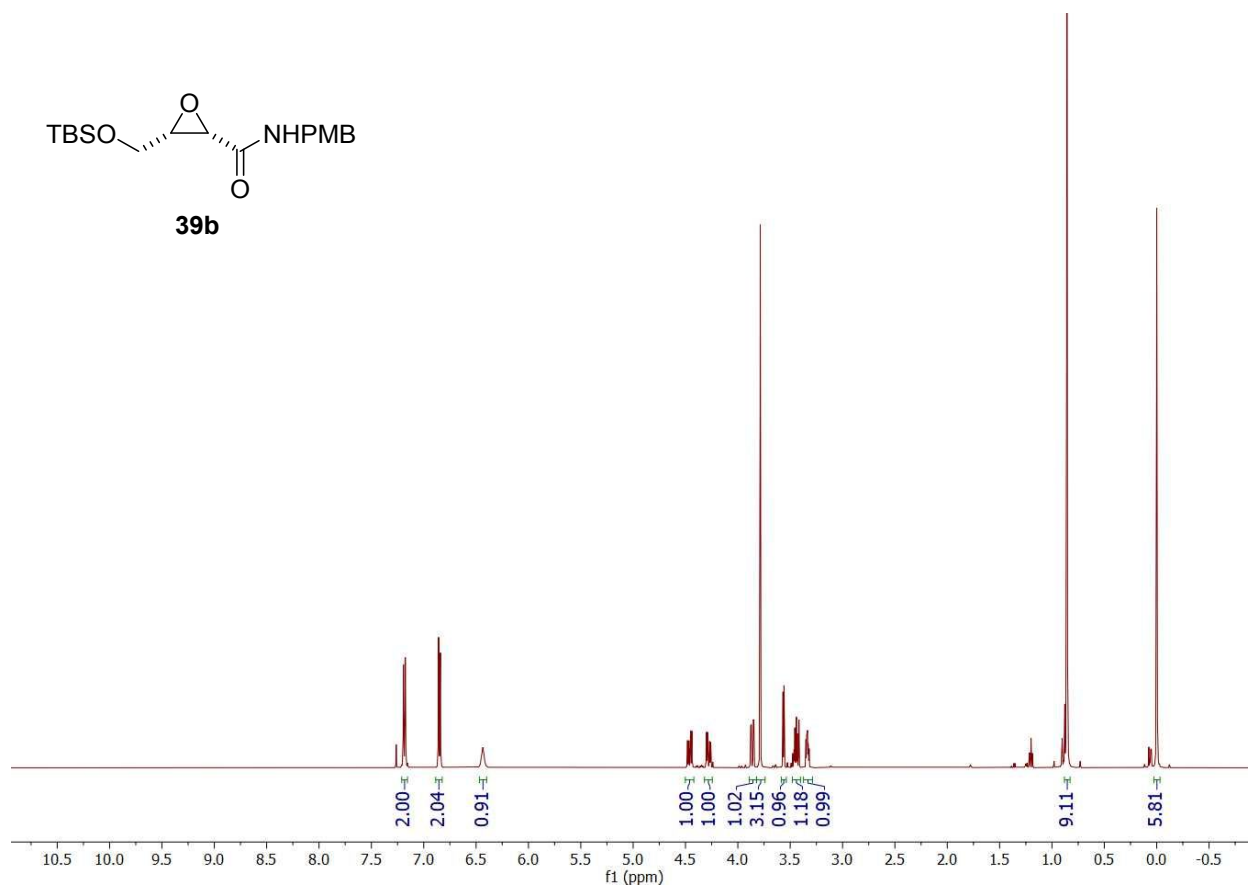

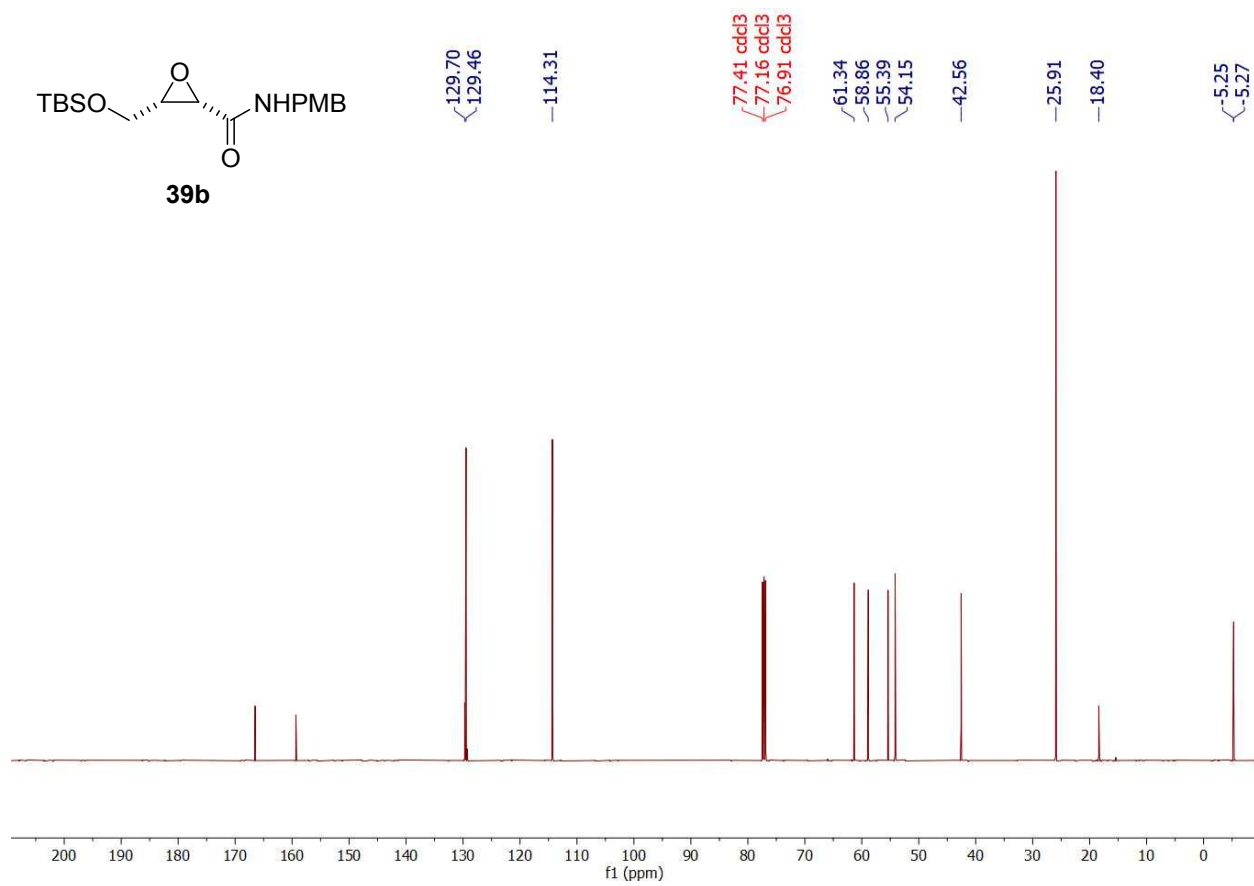

(2*S*,3*S*)-**40a**-<sup>1</sup>H-NMR (500 MHz -CDCl<sub>3</sub>); <sup>13</sup>C{<sup>1</sup>H} (126 MHz, CDCl<sub>3</sub>)

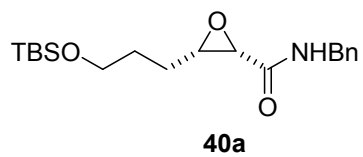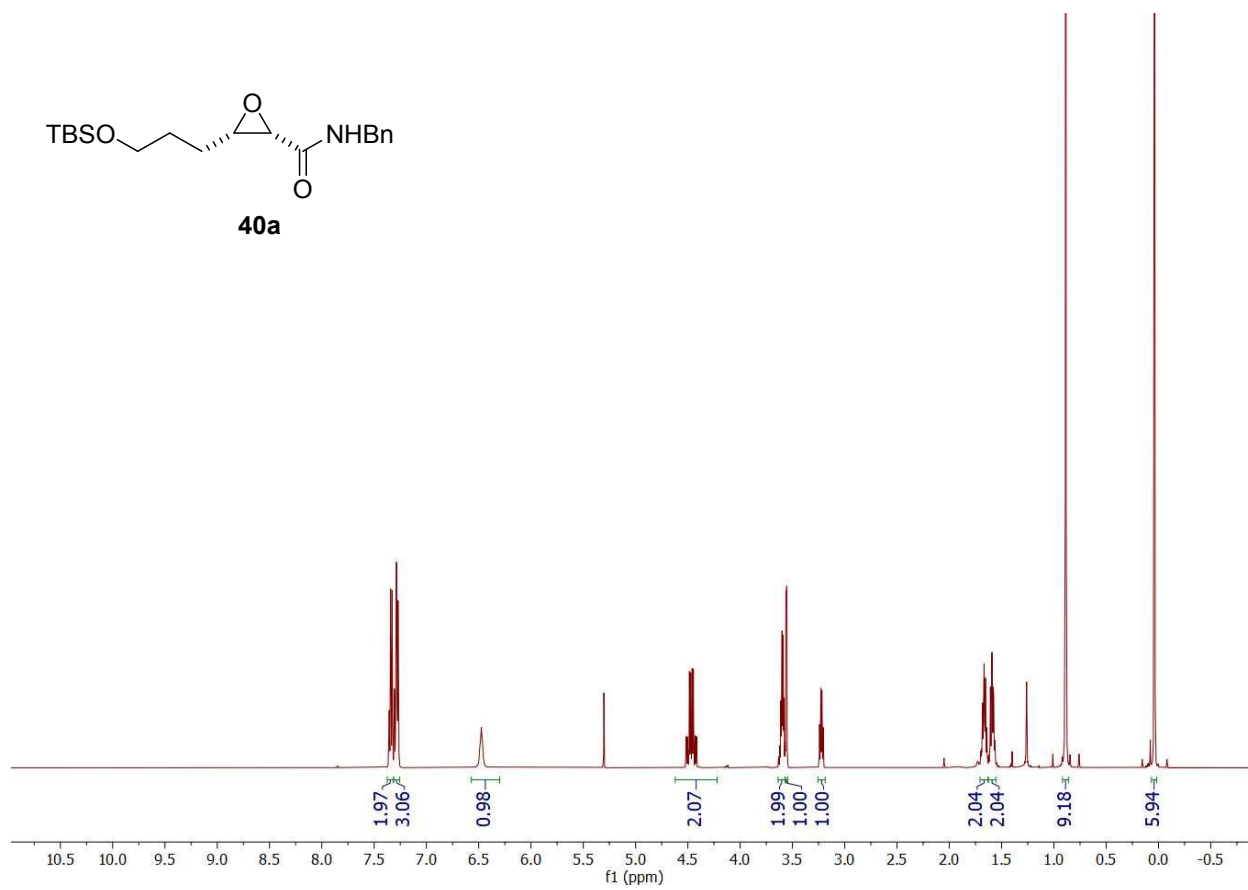

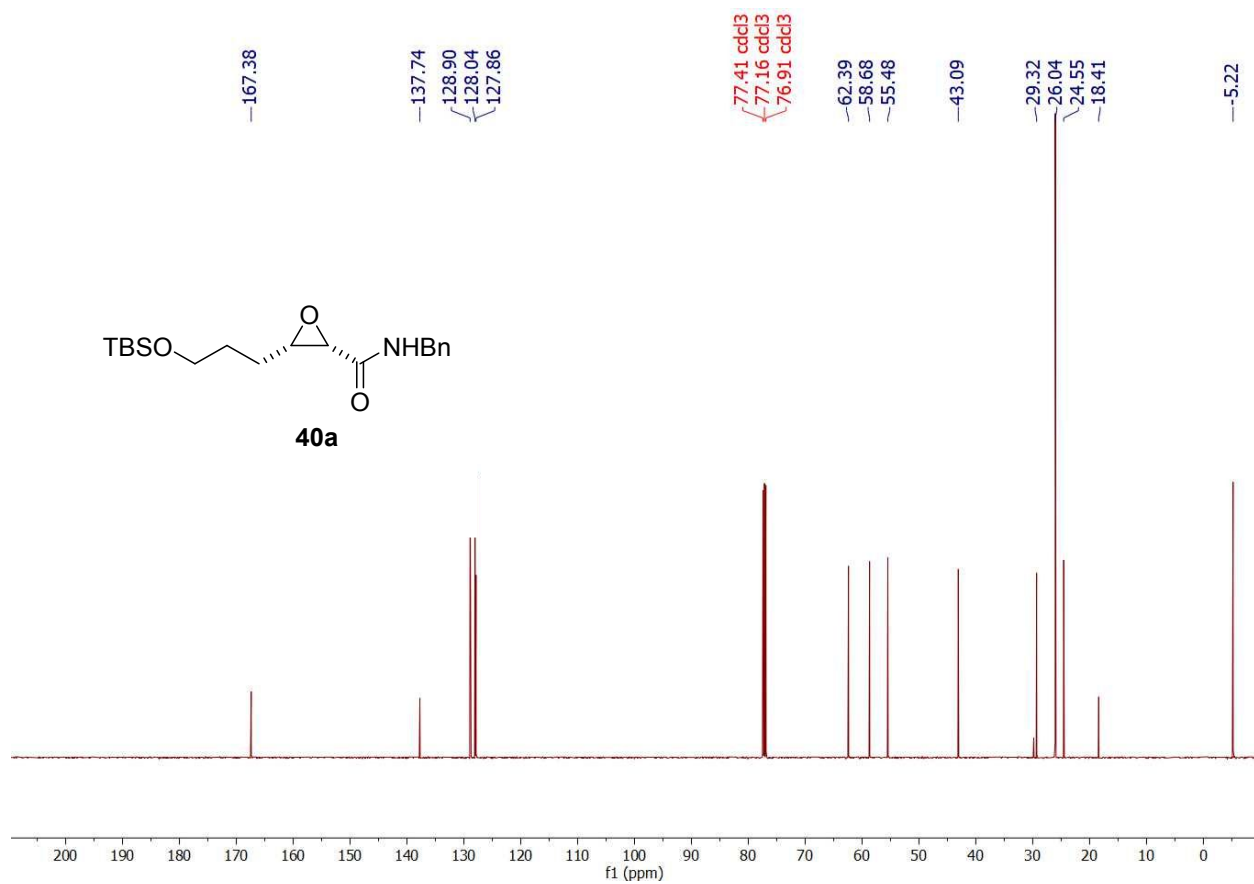

(2*S*,3*S*)-**40b**-<sup>1</sup>H-NMR (500 MHz -CDCl<sub>3</sub>); <sup>13</sup>C{<sup>1</sup>H} (126 MHz, CDCl<sub>3</sub>)

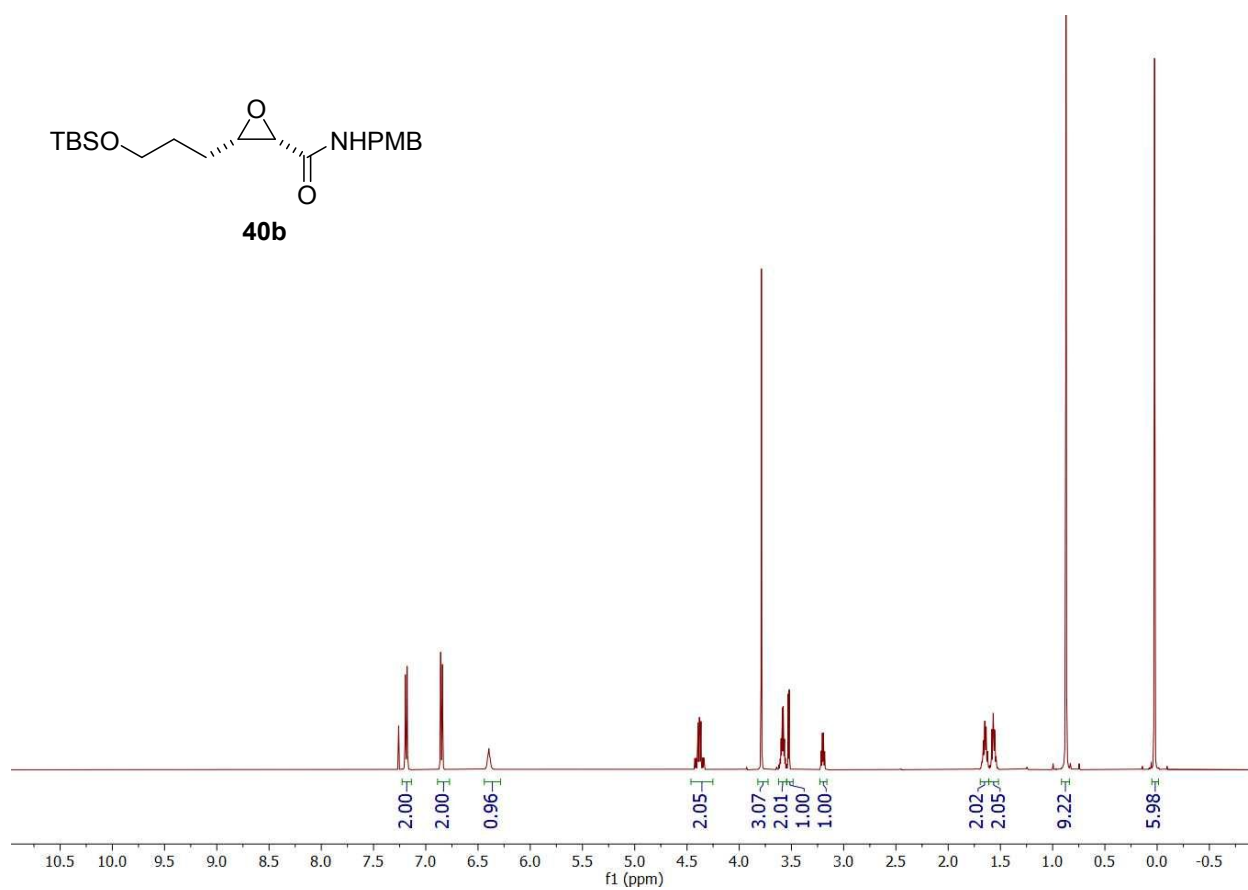

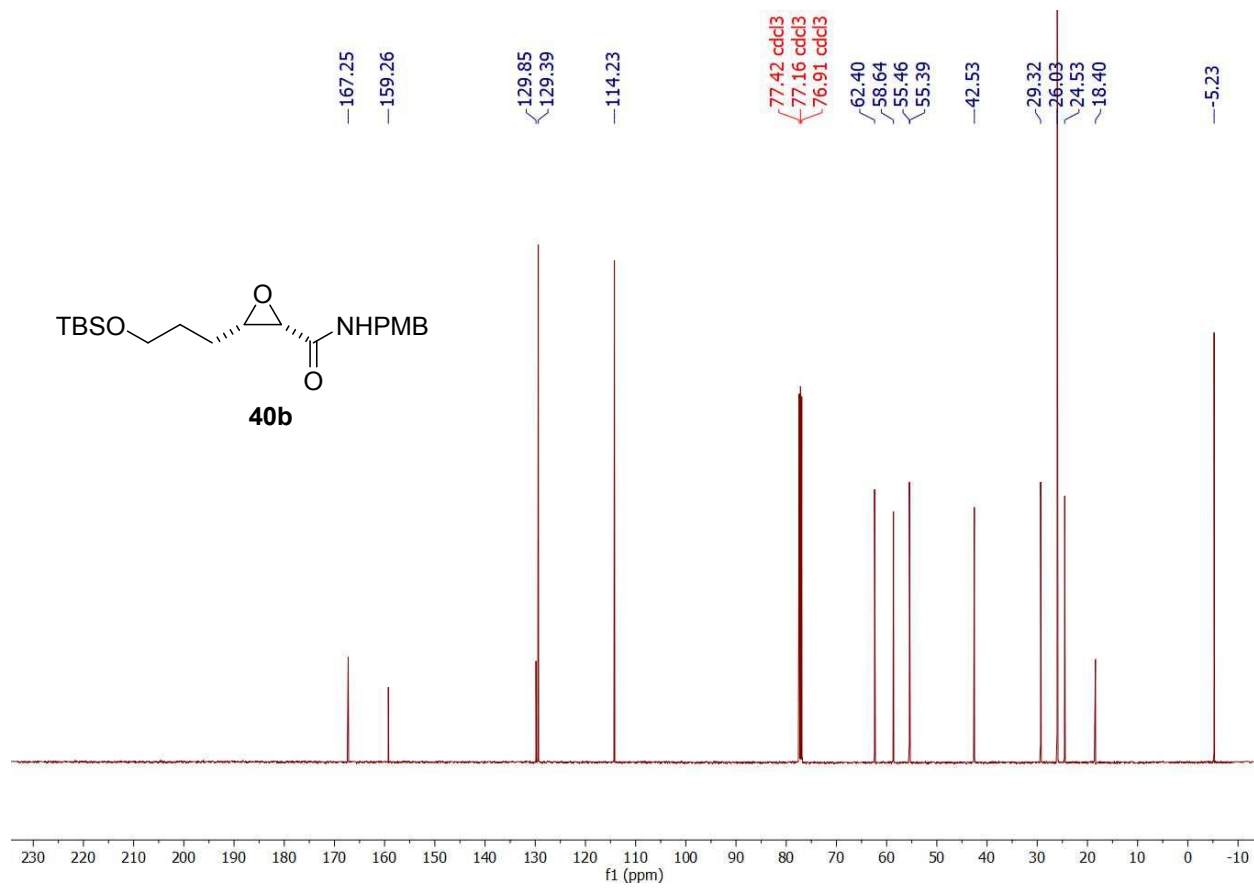



(2*S*,3*S*)-**41a**-<sup>1</sup>H-NMR (500 MHz -CDCl<sub>3</sub>); <sup>13</sup>C{<sup>1</sup>H} (126 MHz, CDCl<sub>3</sub>)

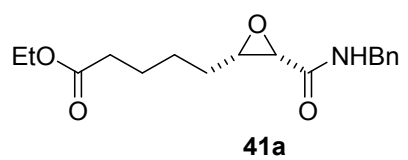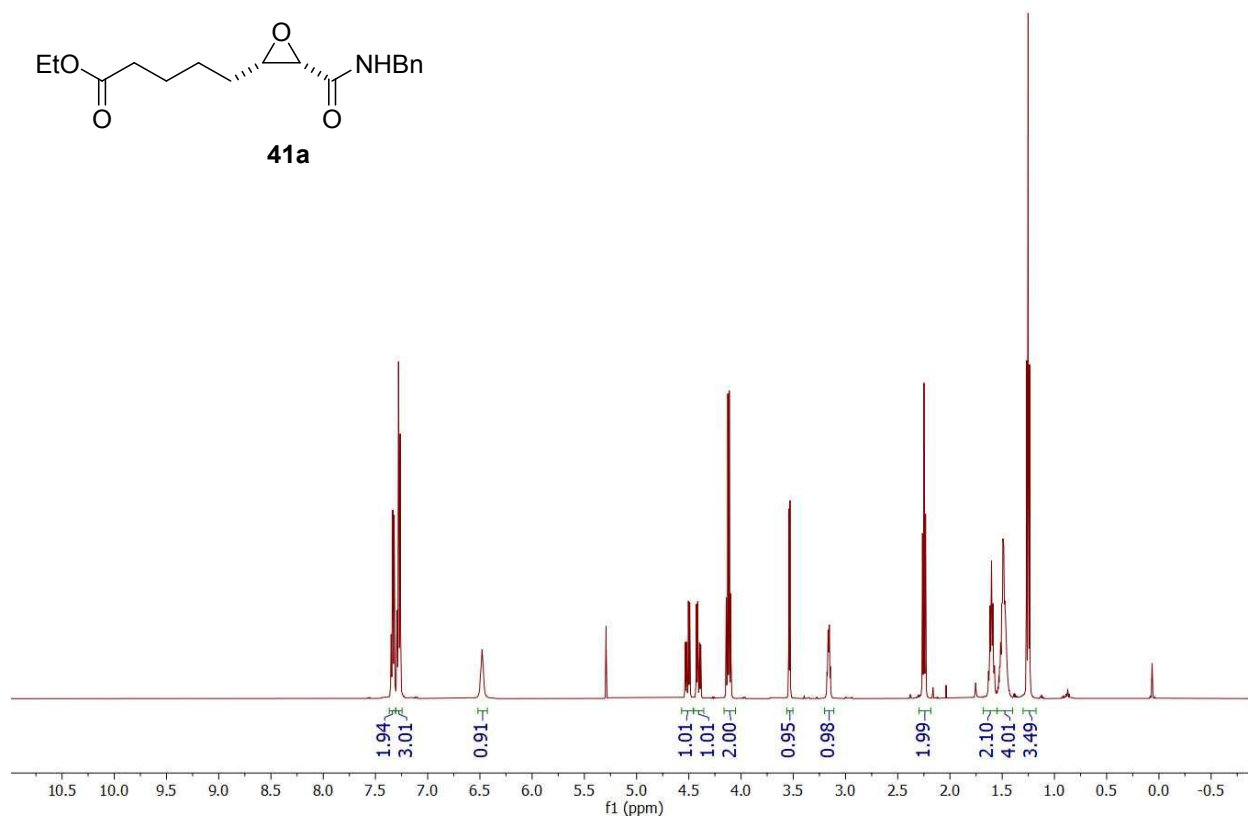

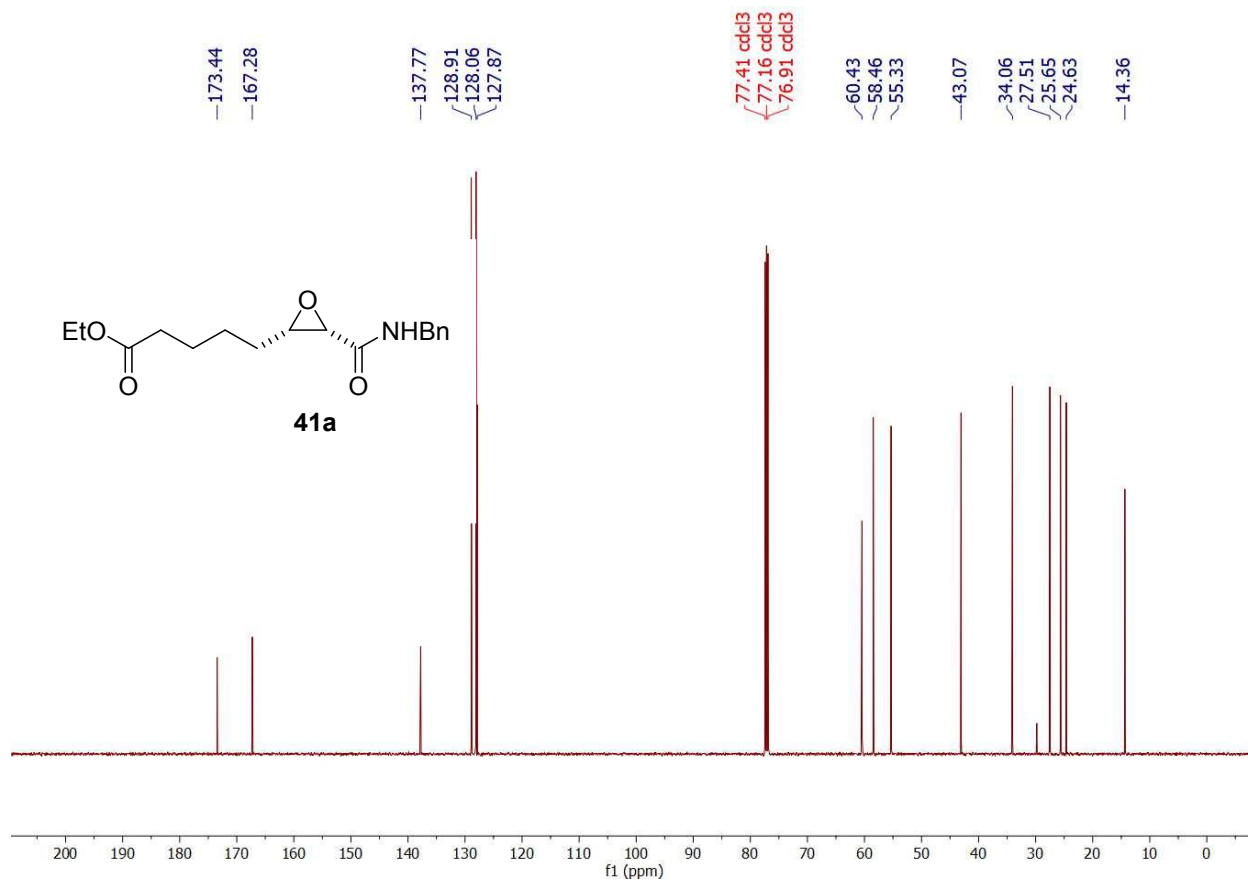

(2*S*,3*S*)-**44**-<sup>1</sup>H-NMR (500 MHz -CDCl<sub>3</sub>); <sup>13</sup>C{<sup>1</sup>H} (126 MHz, CDCl<sub>3</sub>)

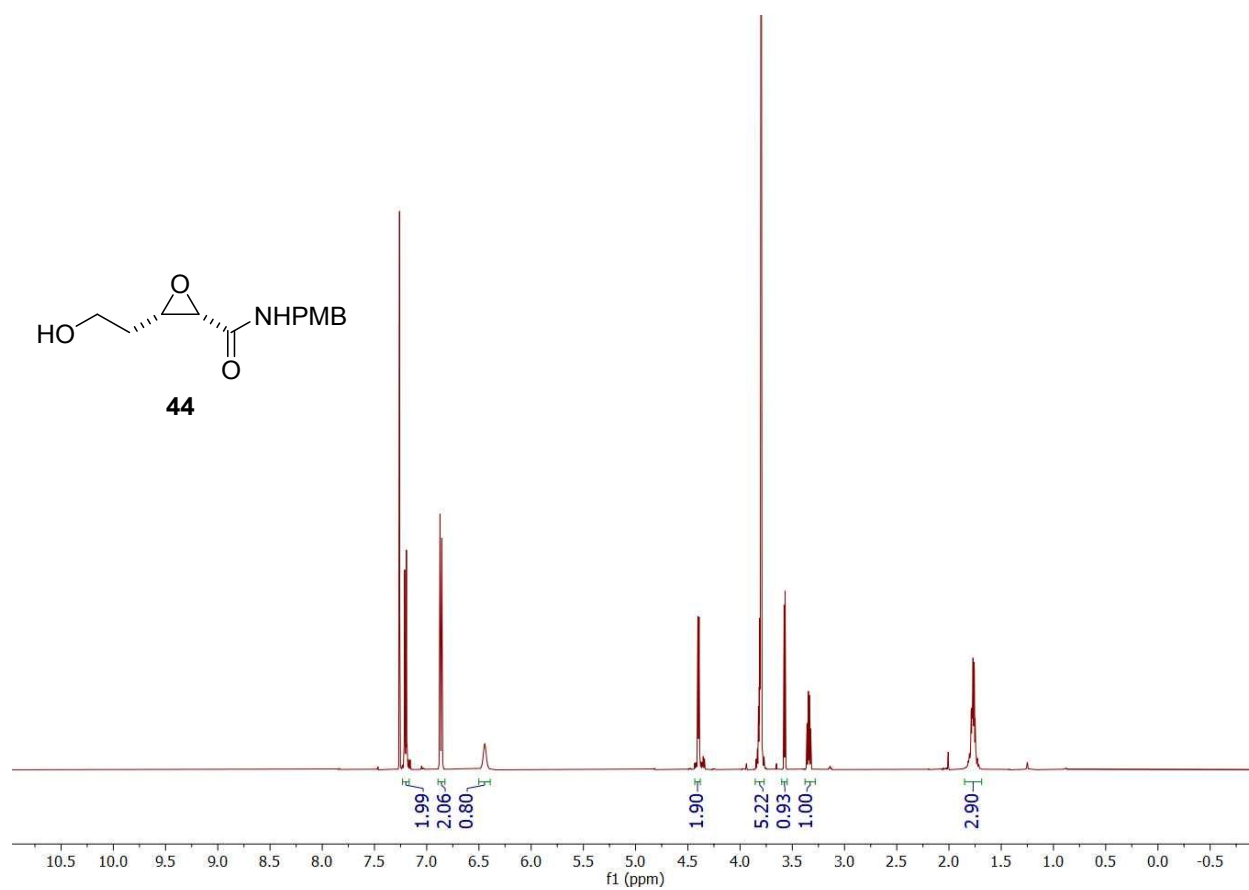

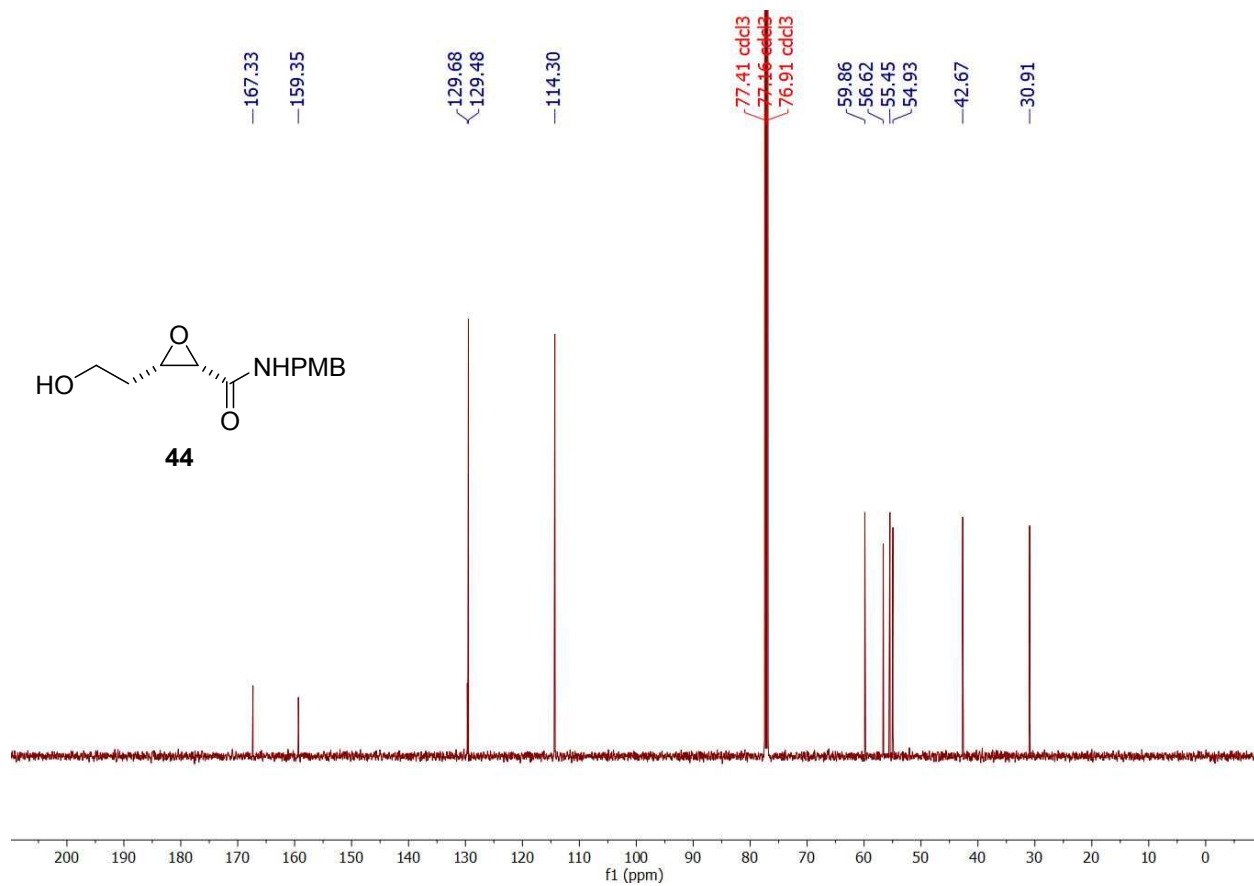

(2*S*,3*S*)-**45**-<sup>1</sup>H-NMR (500 MHz -CDCl<sub>3</sub>); <sup>13</sup>C{<sup>1</sup>H} (126 MHz, CDCl<sub>3</sub>)

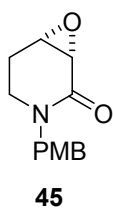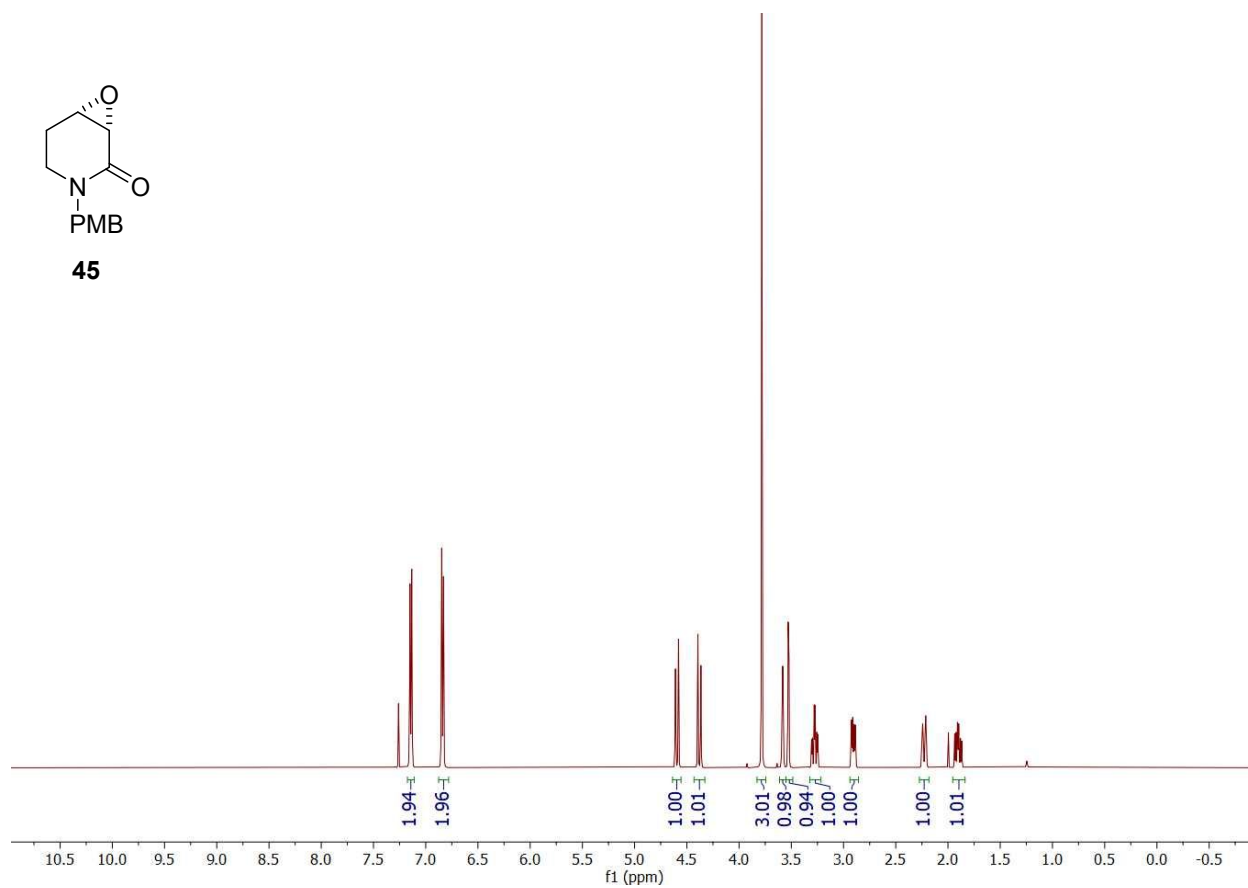

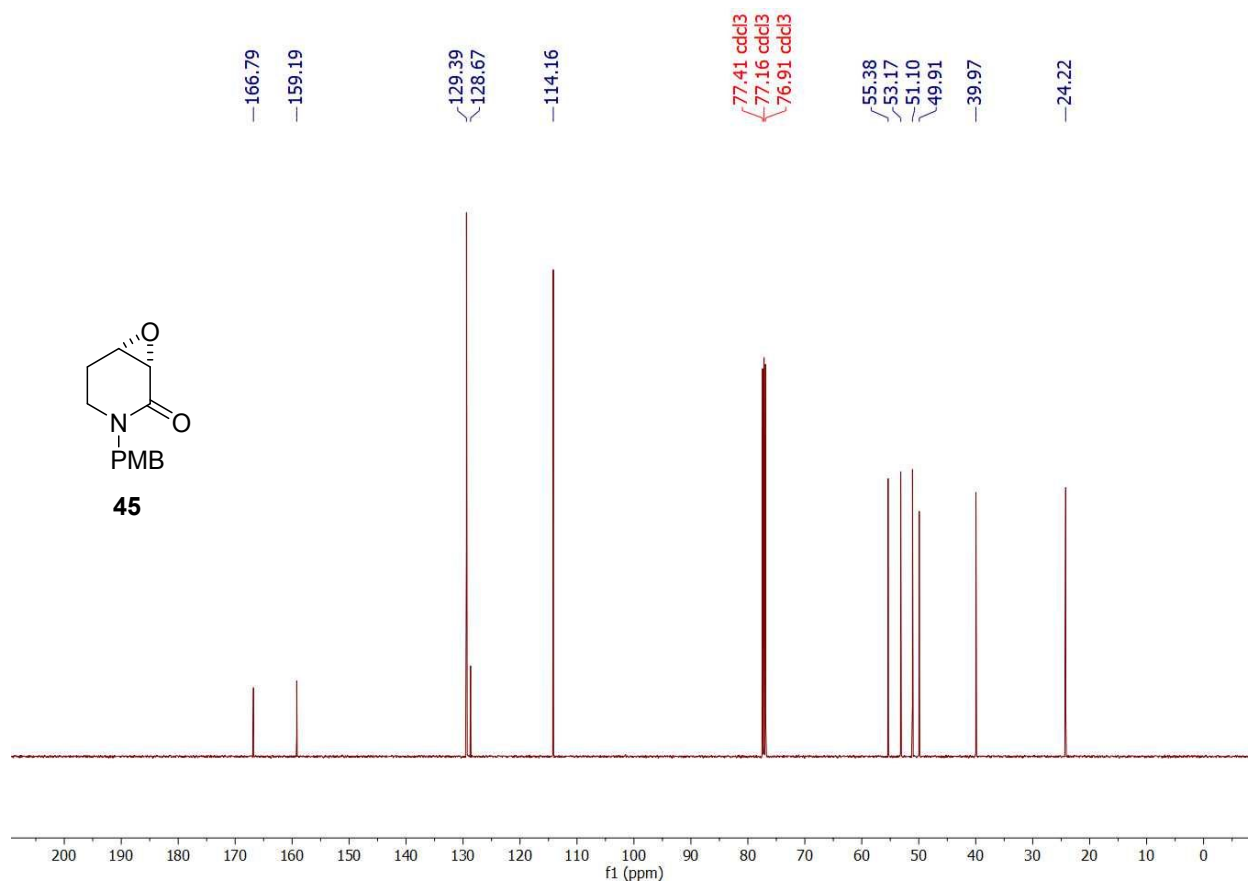

(2*S*,3*S*)-**5**-<sup>1</sup>H-NMR (500 MHz -CDCl<sub>3</sub>); <sup>13</sup>C{<sup>1</sup>H} (126 MHz, CDCl<sub>3</sub>)

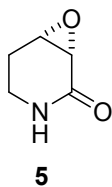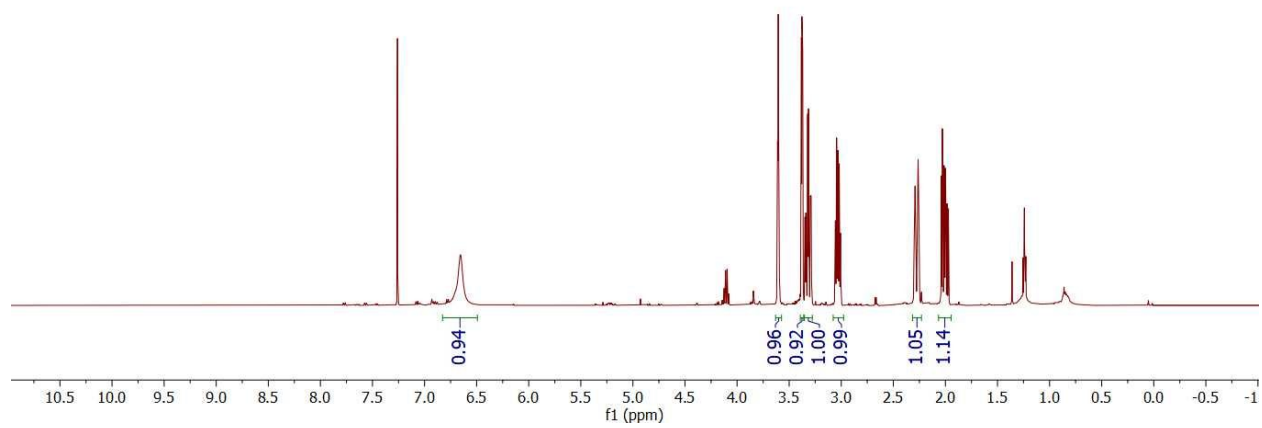

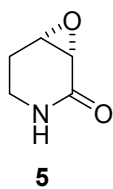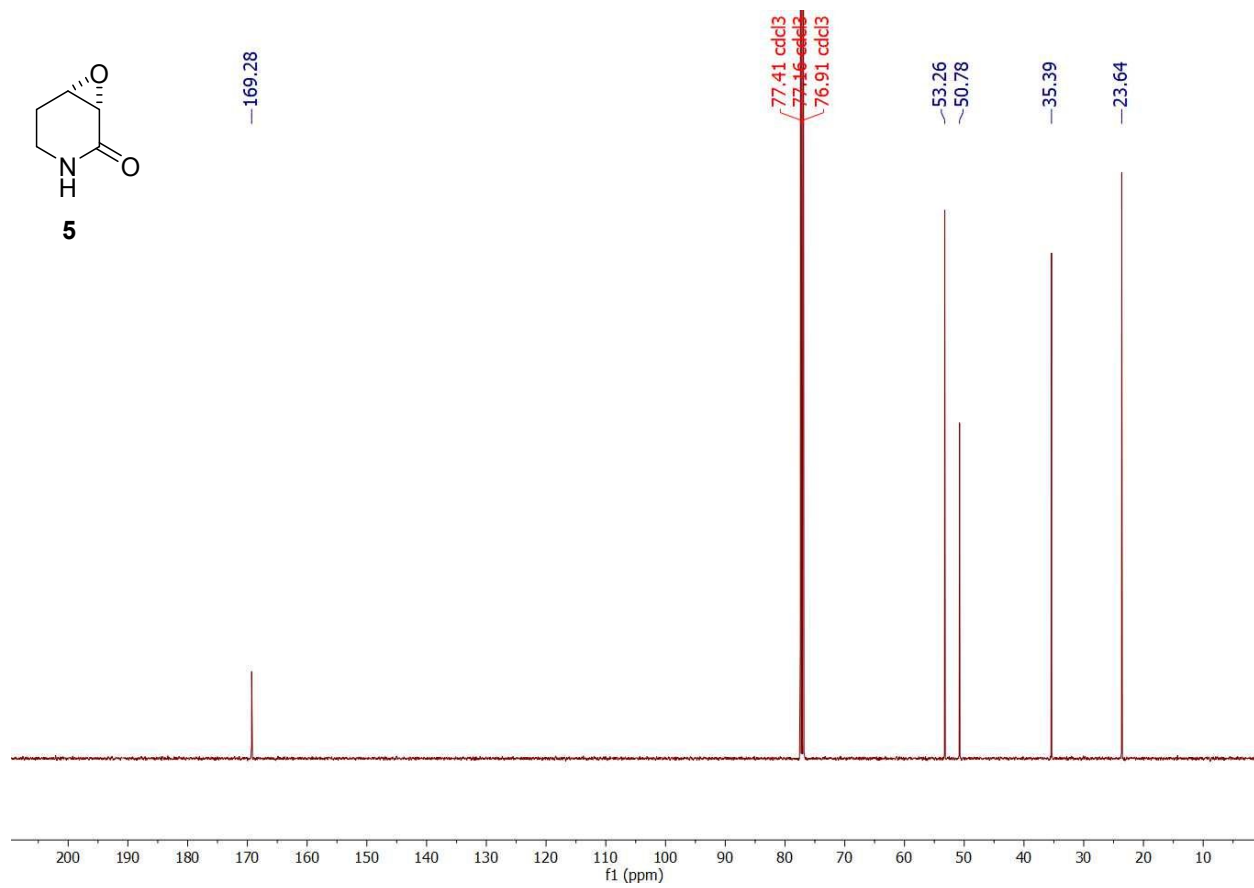



**1b**-<sup>1</sup>H-NMR (500 MHz -CDCl<sub>3</sub>); <sup>13</sup>C{<sup>1</sup>H} (126 MHz, CDCl<sub>3</sub>)

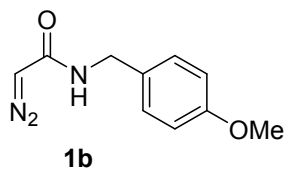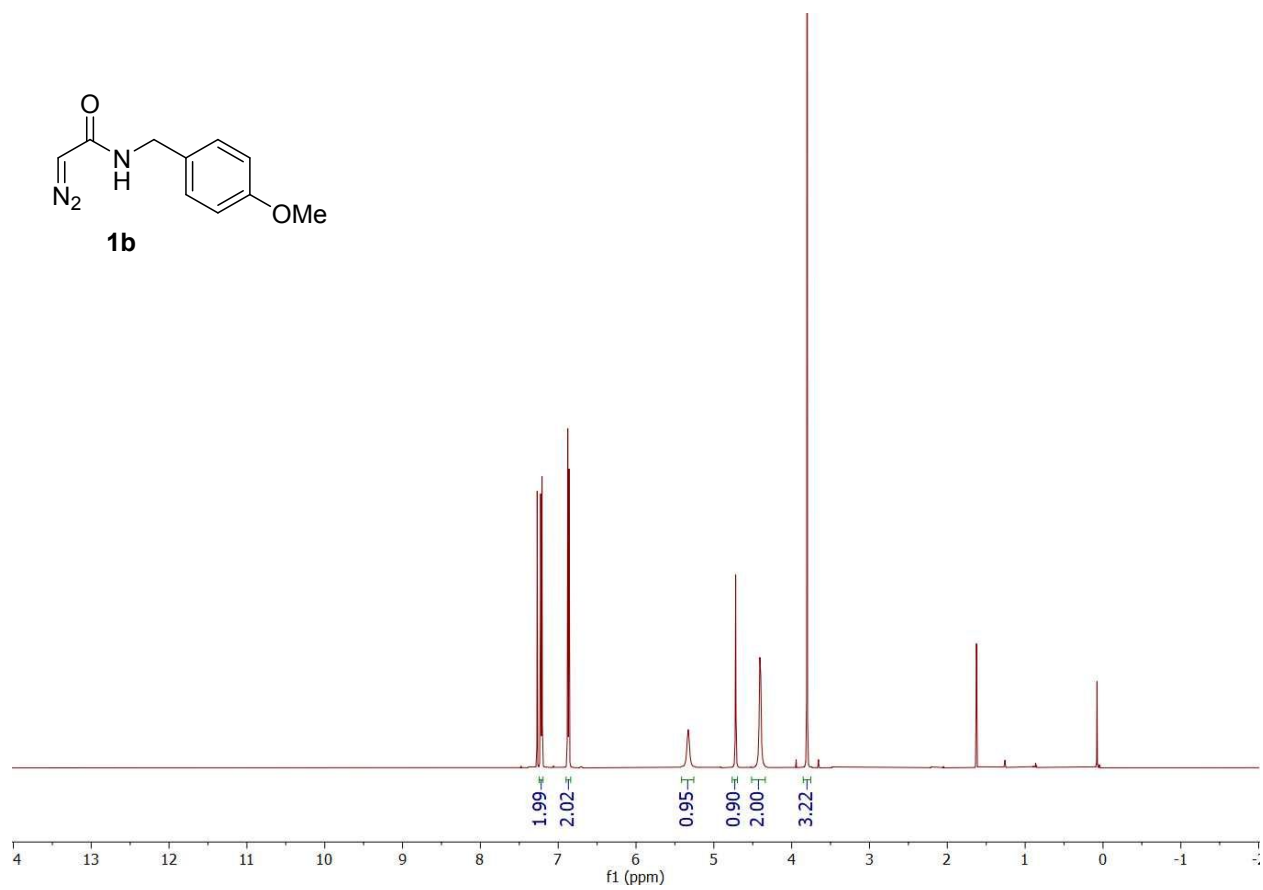

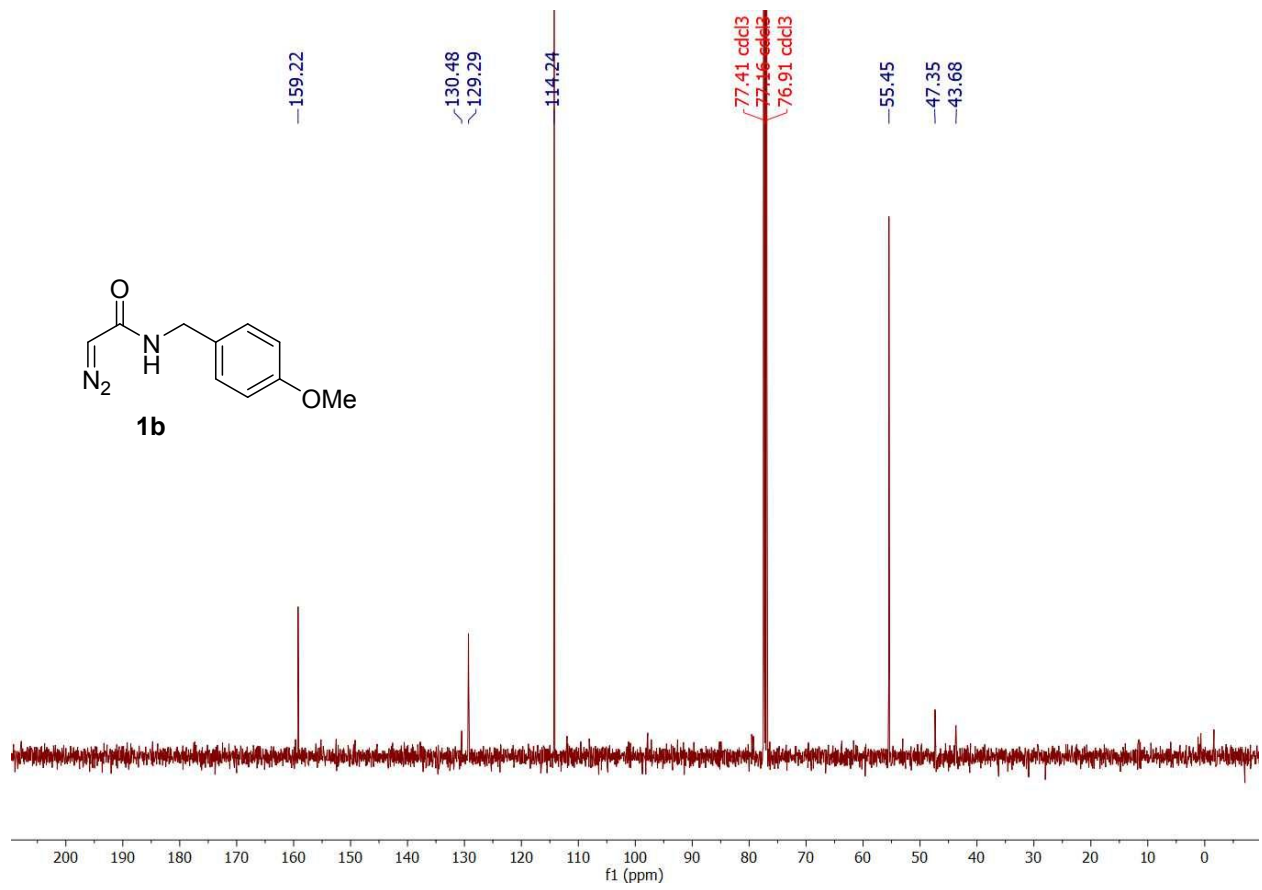

Supplement: NIHMS1973084-supplement-Supporting_Information_1.pdf [file NIHMS1973084-supplement-Supporting_Information_1.pdf]
